# Supplementary material for: Microsecond kinetics in model single- and double-stranded amylose polymers
Source: Royal Society of Chemistry journal article supplement (doi:10.1039/c4cp00570h), 2014-01-01
Supplement: c4cp00570h1.pdf [file c4cp00570h1.pdf]

|                |                                                                                                                                 |
|----------------|---------------------------------------------------------------------------------------------------------------------------------|
| <b>S1</b>      | Structural definitions used in the manuscript                                                                                   |
| <b>S2</b>      | Structures of model amyloses and constituent fragments <b>1-6</b>                                                               |
| <b>S3-9</b>    | Glycosidic linkage histograms and time series ( $\mu$ s simulations of <b>1-5</b> )                                             |
| <b>S10-13</b>  | Glycosidic linkage free energy surfaces ( $\mu$ s simulations of <b>1-5</b> )                                                   |
| <b>S14-18</b>  | Puckering convergence, time series and sinusoidal projections ( $\mu$ s simulations of <b>1-6</b> )                             |
| <b>S19-S23</b> | Ring puckering populations and free energies ( $\mu$ s simulations of <b>1-6</b> )                                              |
| <b>S24</b>     | Time series of first hydration shell water occupancy and $R_g$ in <b>1</b>                                                      |
| <b>S25-S30</b> | Experimental and calculated and $^1\text{H}$ - $^1\text{H}$ three-bond vicinal spin-couplings ( $^3J_{\text{HH}}$ ): <b>1-6</b> |
| <b>S31</b>     | Analysis of $\alpha$ -D-Glc puckers in 174 high-resolution Protein Data Bank entries ( $< 2\text{\AA}$ )                        |
| <b>S32</b>     | Radii of gyration: averages, means and standard deviations                                                                      |
| <b>S33</b>     | Occupancy of <i>anti</i> $\psi$ geometry in each glycosidic linkage: <b>1-5</b>                                                 |
| <b>S34</b>     | Classification of the 38 canonical pyranose ring puckers                                                                        |

Figure S1. Nomenclature and structural definitions employed in the manuscript

A: Atom naming convention and example pyranose ring conformations ( ${}^1C_4$  and  ${}^4C_1$  chair puckers)

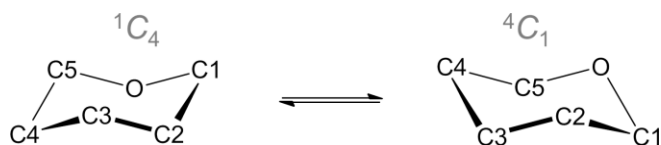

B: Oligosaccharide glycosidic linkage definitions,  $\phi = O_5-C_1-O-C_n$ ,  $\psi = C_1-O-C_n-C_{(n-1)}$

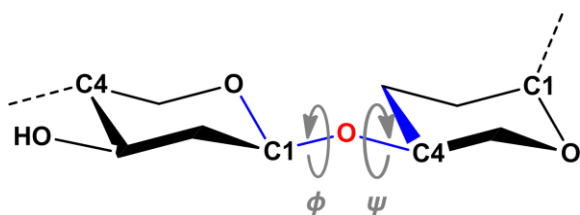

C: Example pyranose ring three bond proton-proton ( ${}^1H-{}^1H$ ) vicinal spin-coupling ( ${}^3J_{H,H}$ )

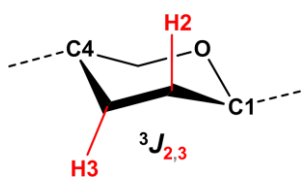

Figure S2. Structures of model amylose fragments 1-5

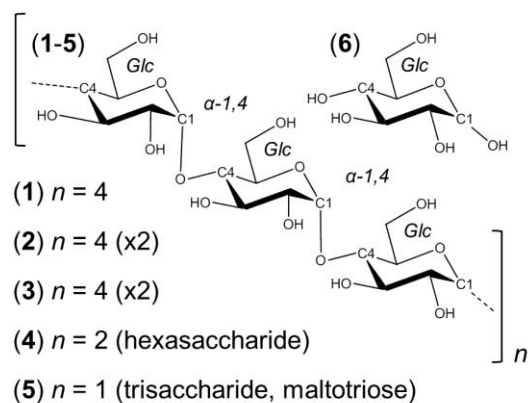

(2) Antiparallel double-helix, (3) parallel double helix

(1-5) Terminal Glc residues were (1- or -4 position) hydroxyl terminated

Figure S3. Linkage histograms & time series: 10  $\mu$ s simulation of **1** (dodecasaccharide)

Glycosidic linkages are numbered from the reducing end; the *anti* conformer is noted

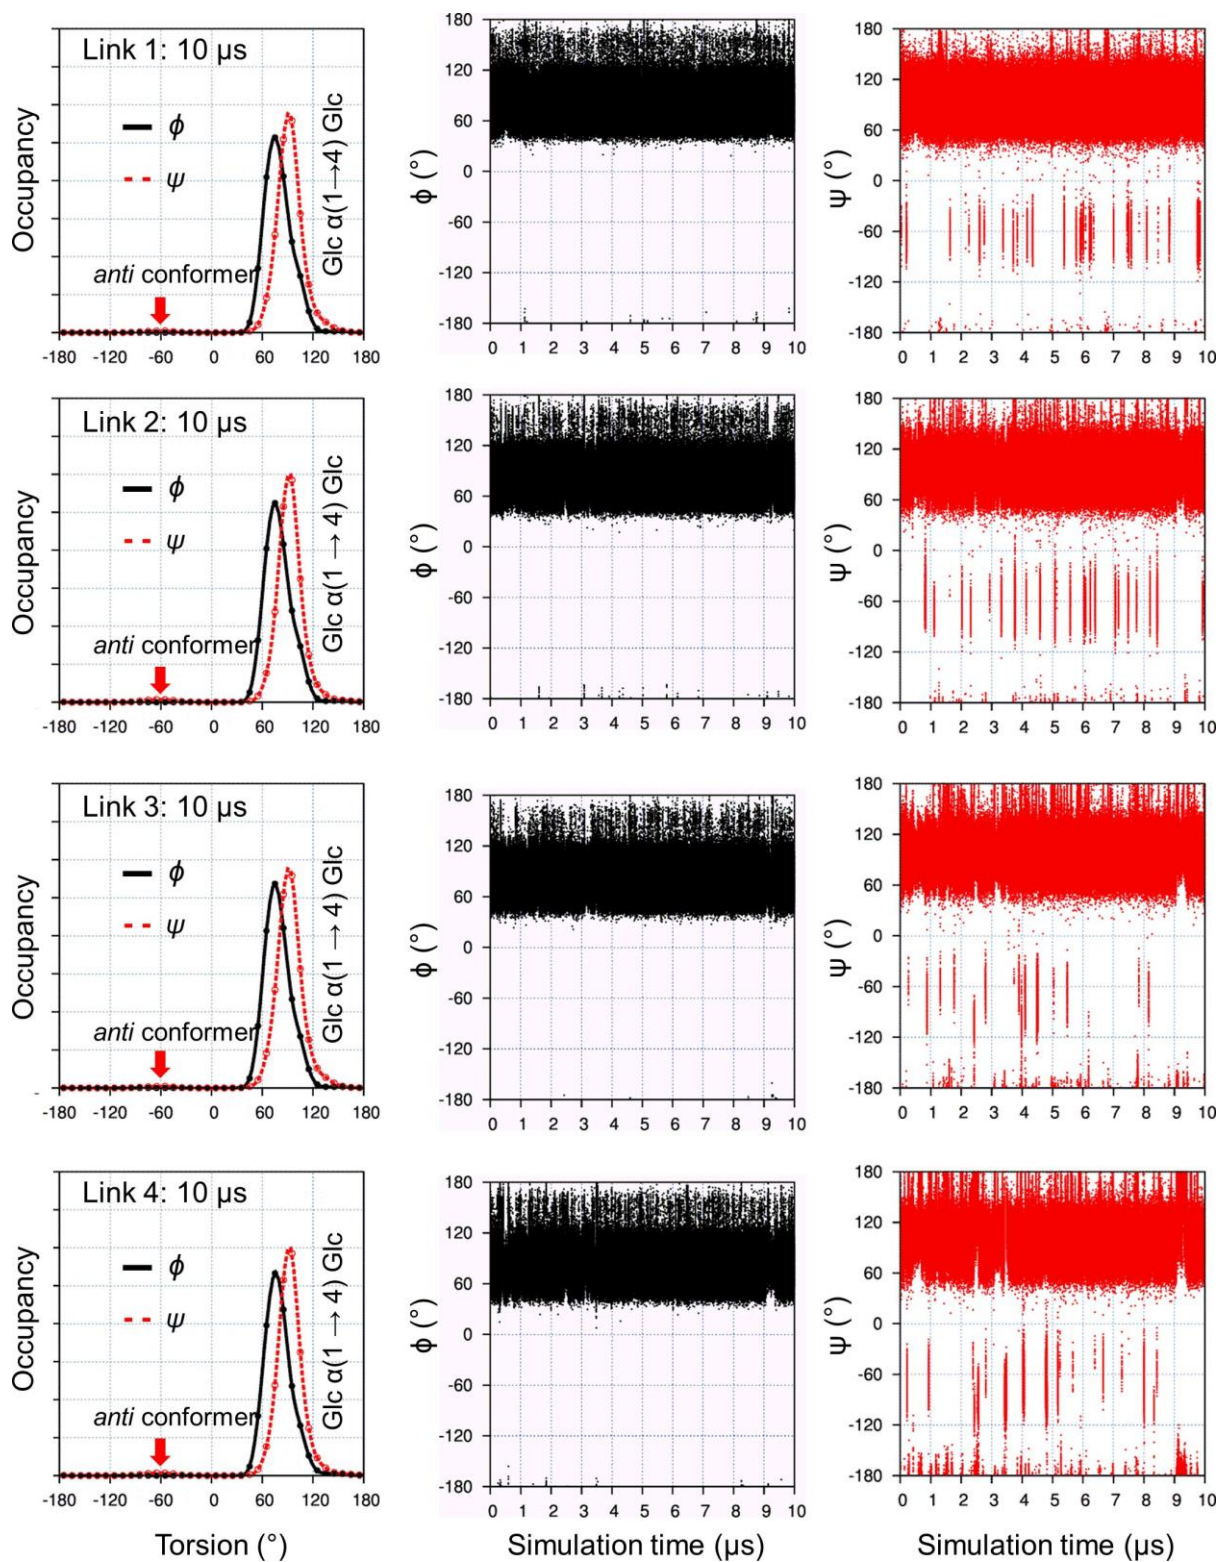

Figure S3. Linkage histograms & time series: 10  $\mu\text{s}$  simulation of **1** (dodecasaccharide)

Glycosidic linkages are numbered from the reducing end; the *anti* conformer is noted

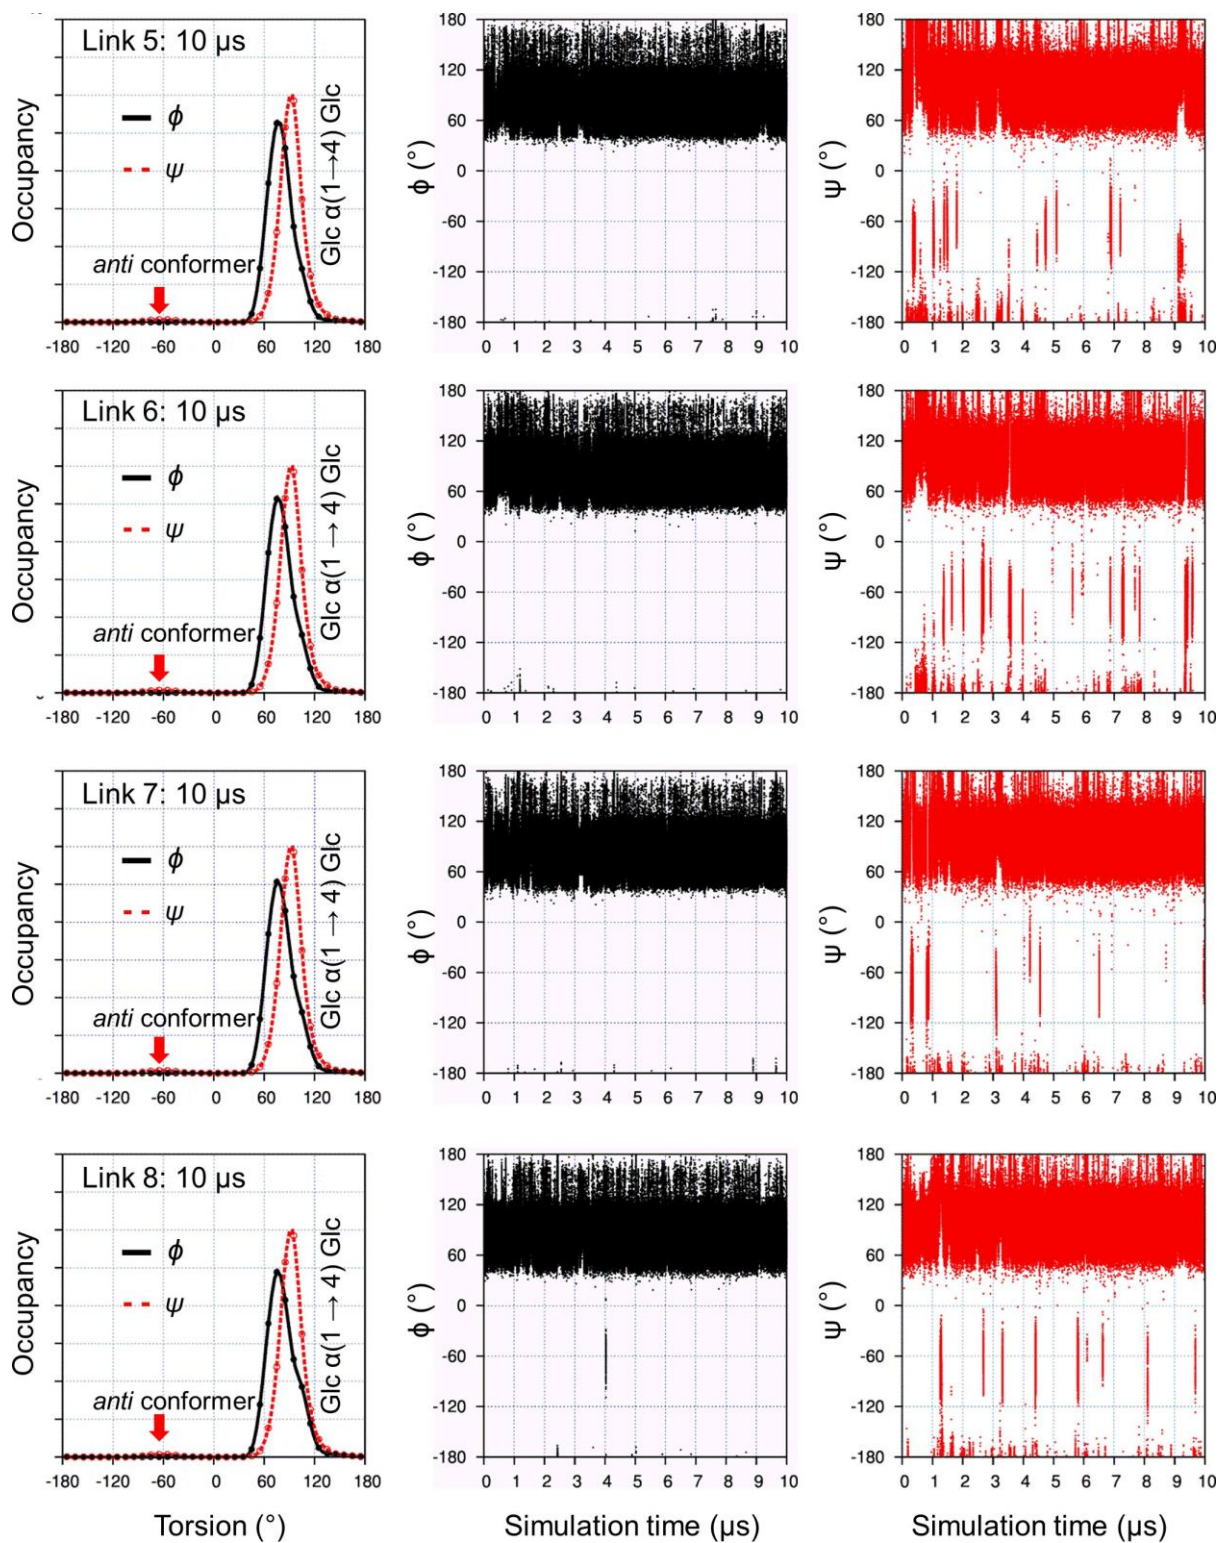

S3 continued

Figure S3. Linkage histograms & time series: 10  $\mu$ s simulation of **1** (dodecasaccharide)

Glycosidic linkages are numbered from the reducing end; the *anti* conformer is noted

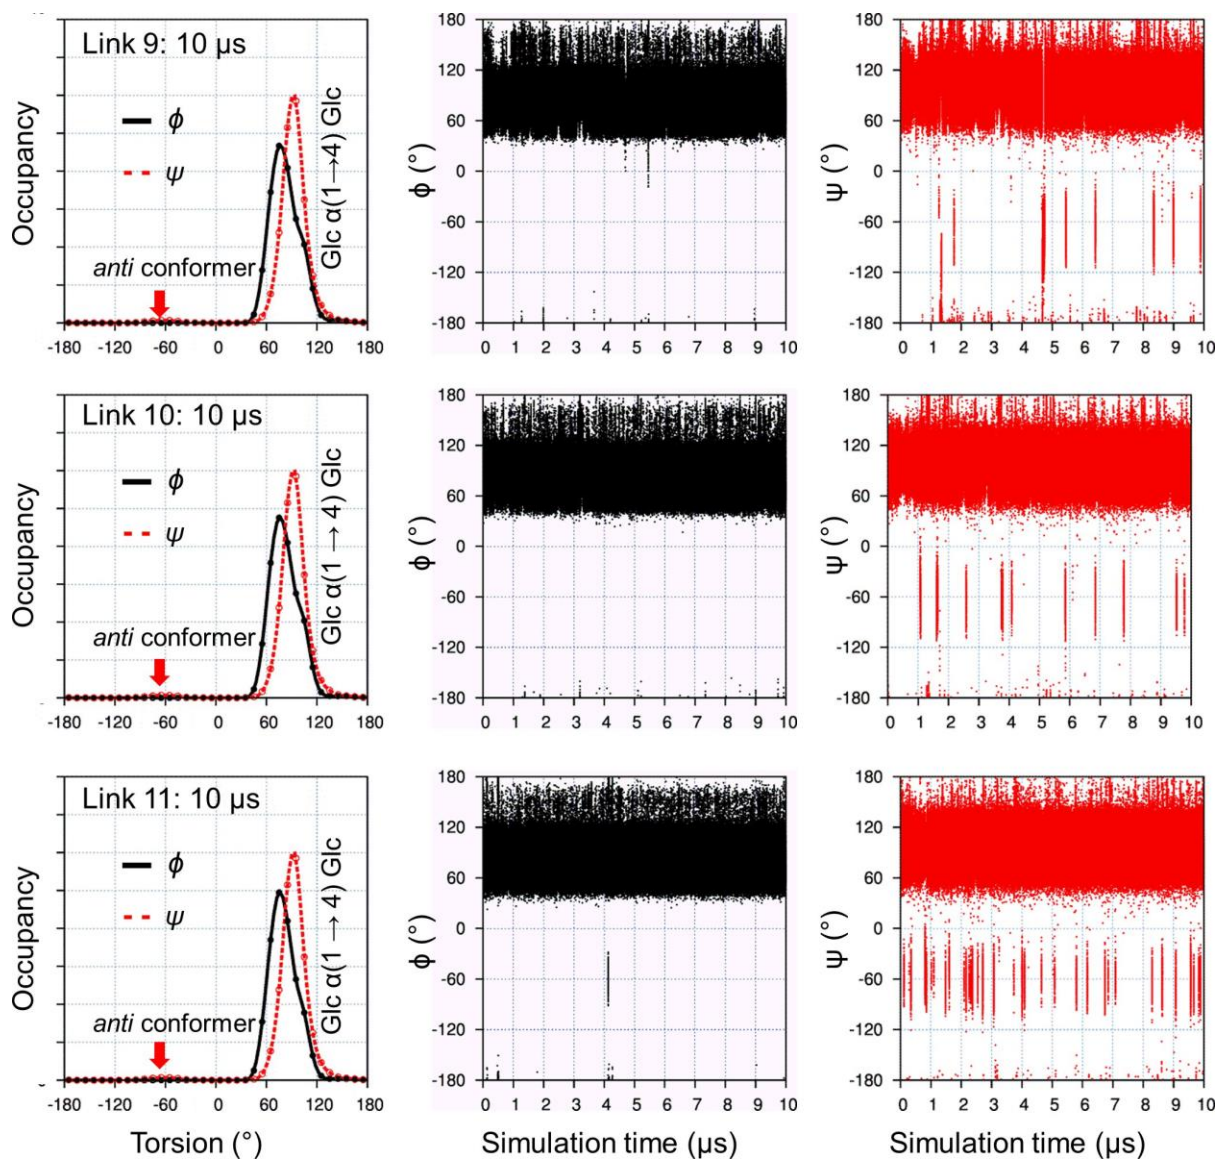

Figure S4. Linkage histograms & time series: 10  $\mu$ s simulation of **2** (antiparallel double-helix: strand A)

Glycosidic linkages are numbered from the reducing end; the *anti* conformer is noted

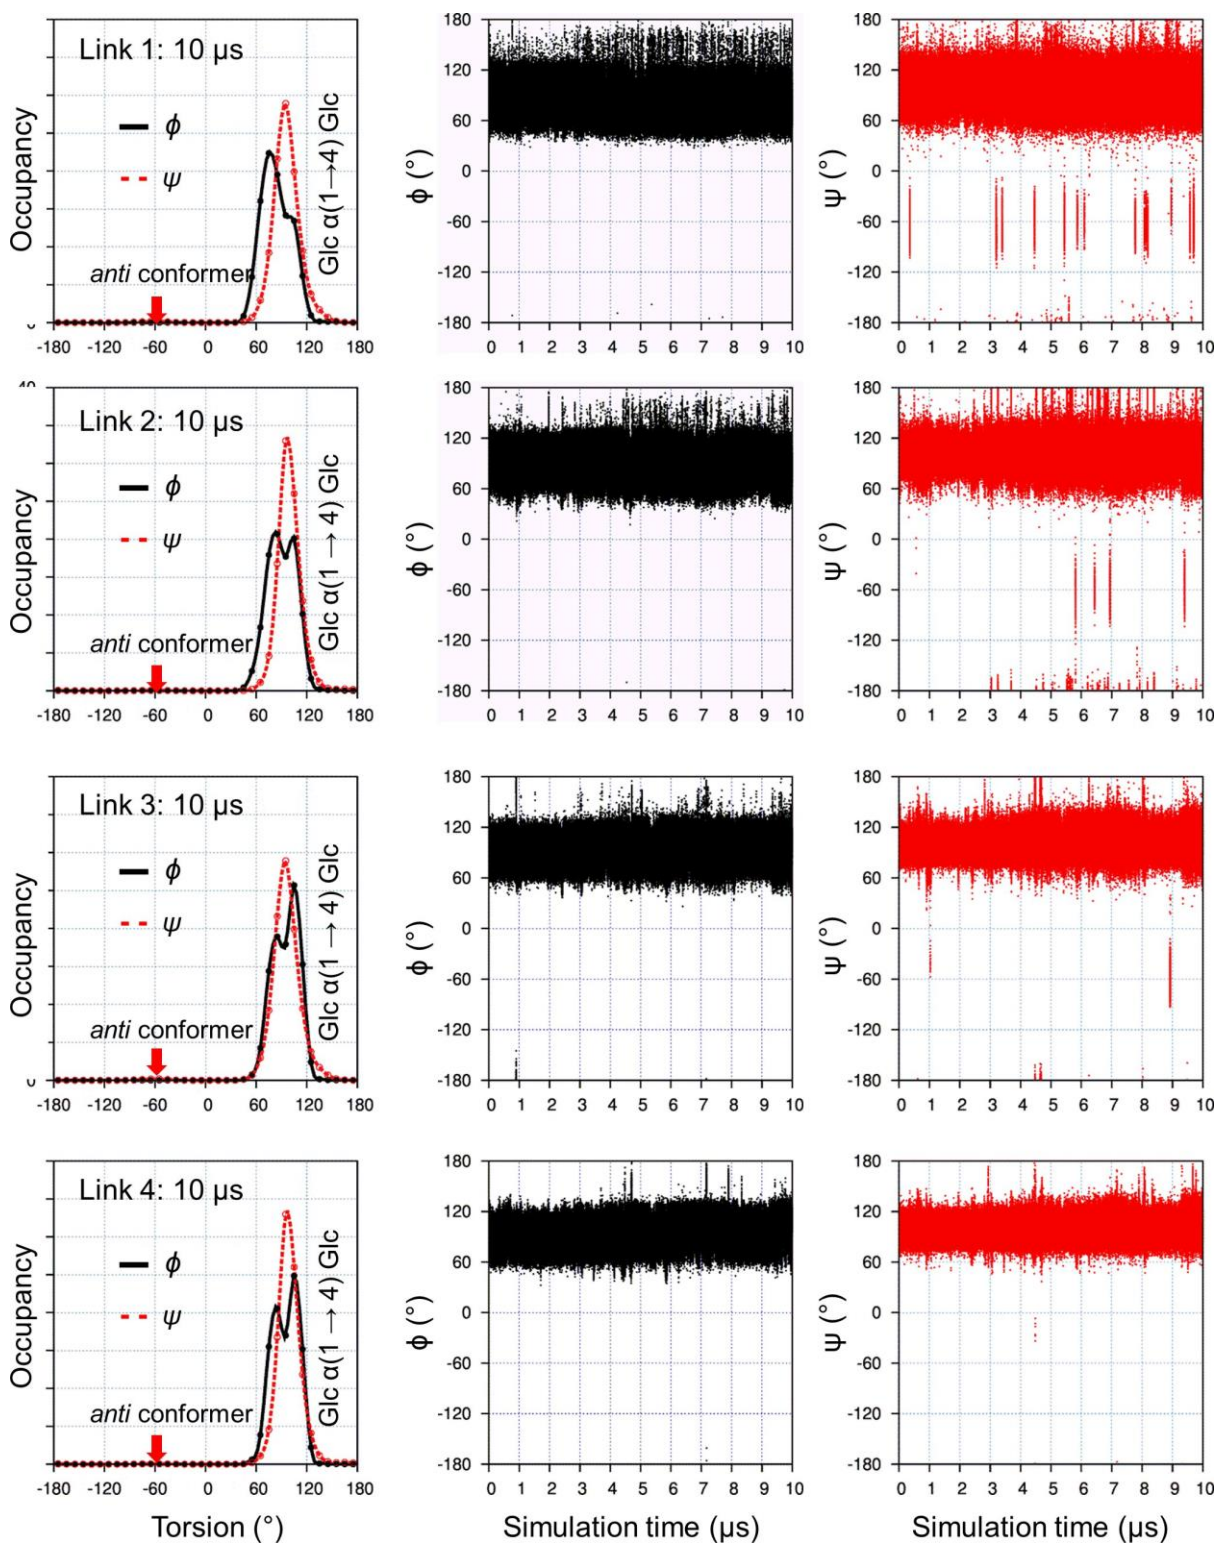

Figure S4. Linkage histograms & time series: 10  $\mu$ s simulation of **2** (antiparallel double-helix: strand A)

Glycosidic linkages are numbered from the reducing end; the *anti* conformer is noted

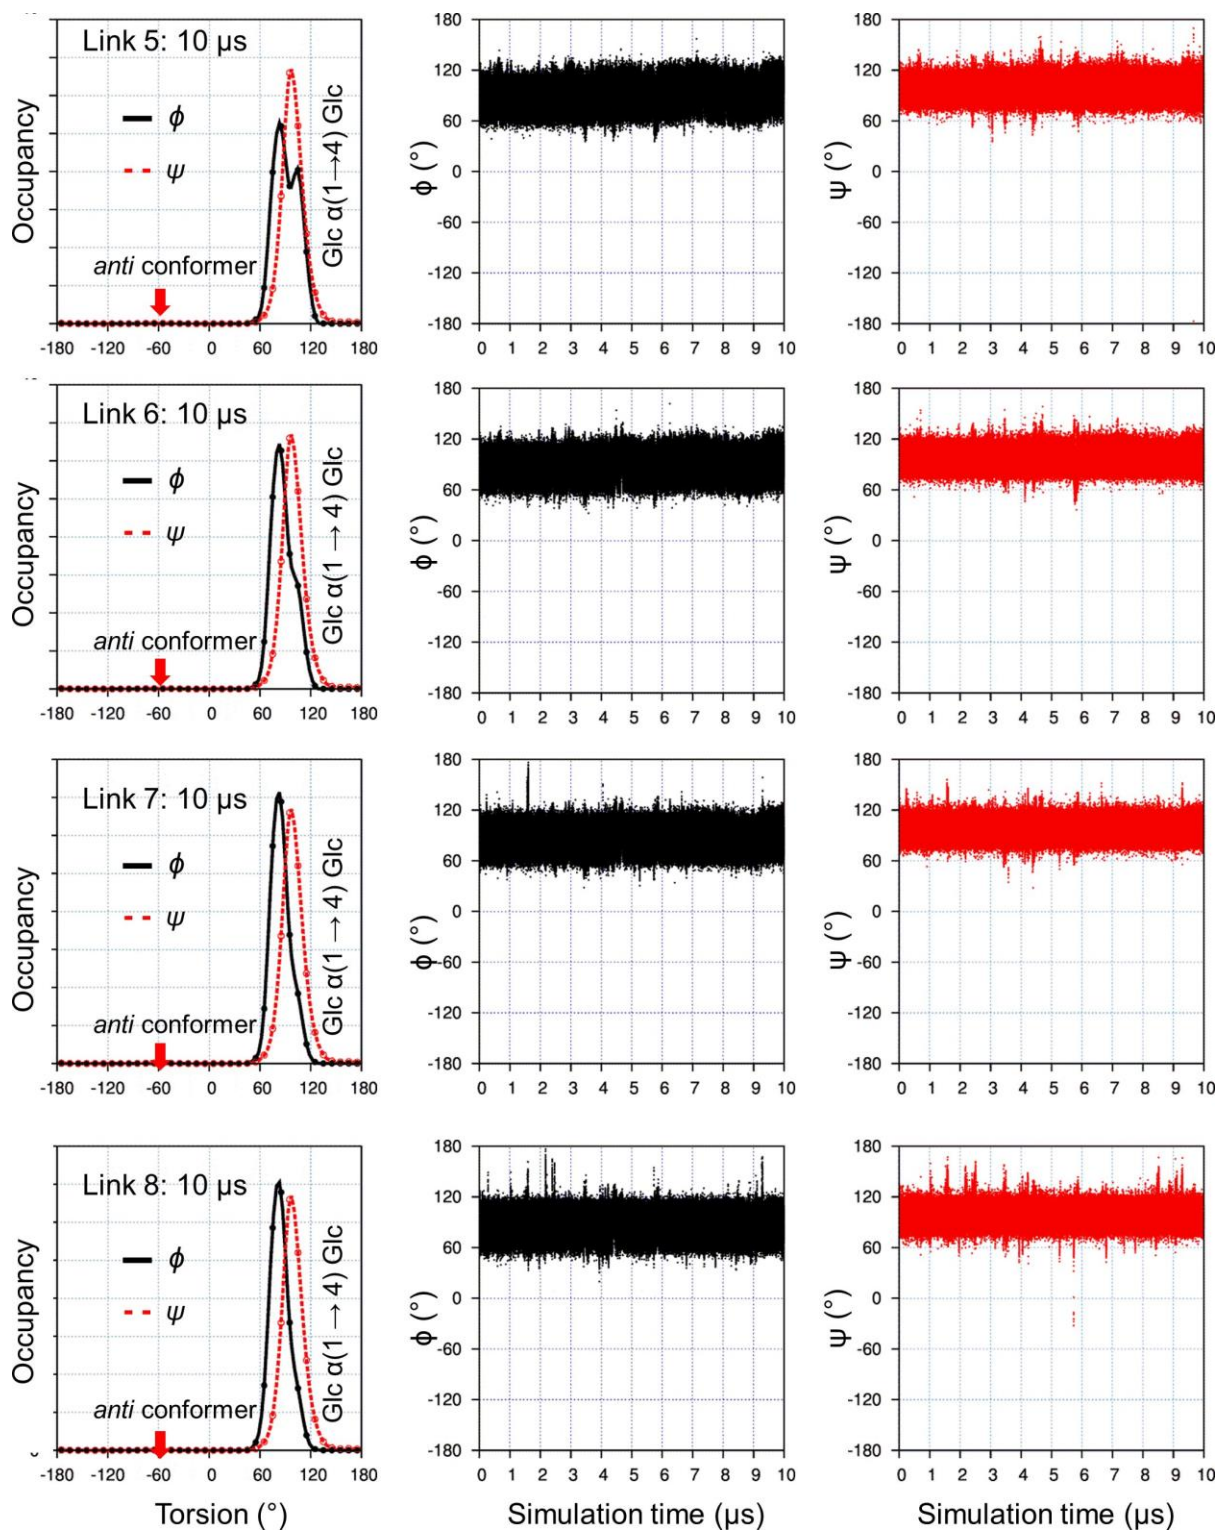

S4 continued

Figure S4. Linkage histograms & time series: 10  $\mu\text{s}$  simulation of **2** (antiparallel double-helix: strand A)

Glycosidic linkages are numbered from the reducing end; the *anti* conformer is noted

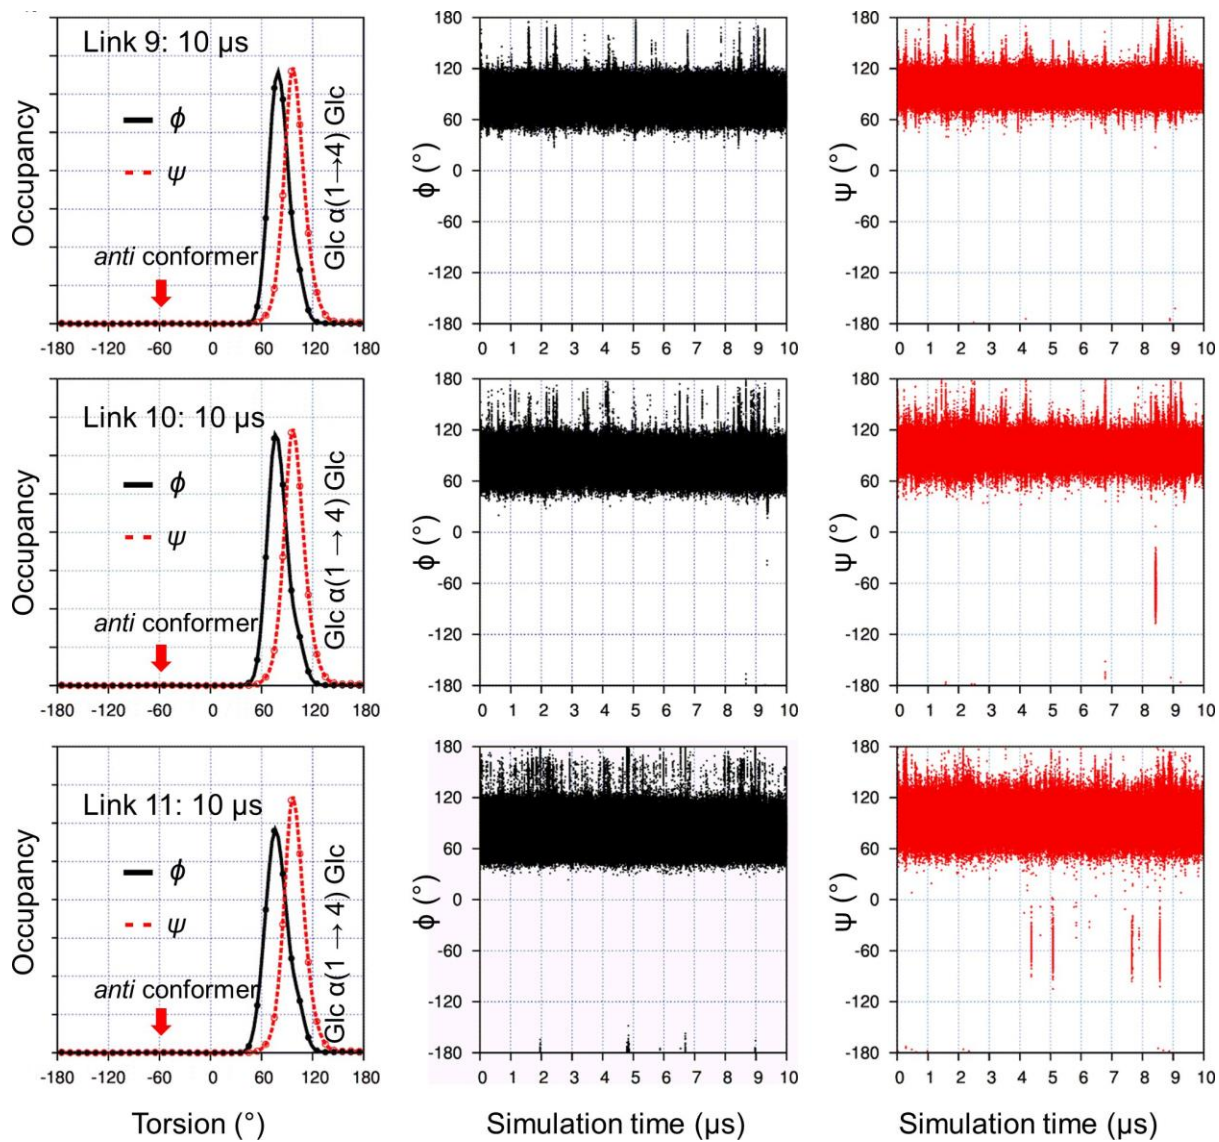

S4 continued



Figure S5. Linkage histograms & time series: 10  $\mu$ s simulation of **2** (antiparallel double-helix: strand B)

Glycosidic linkages are numbered from the reducing end; the *anti conformer* is noted

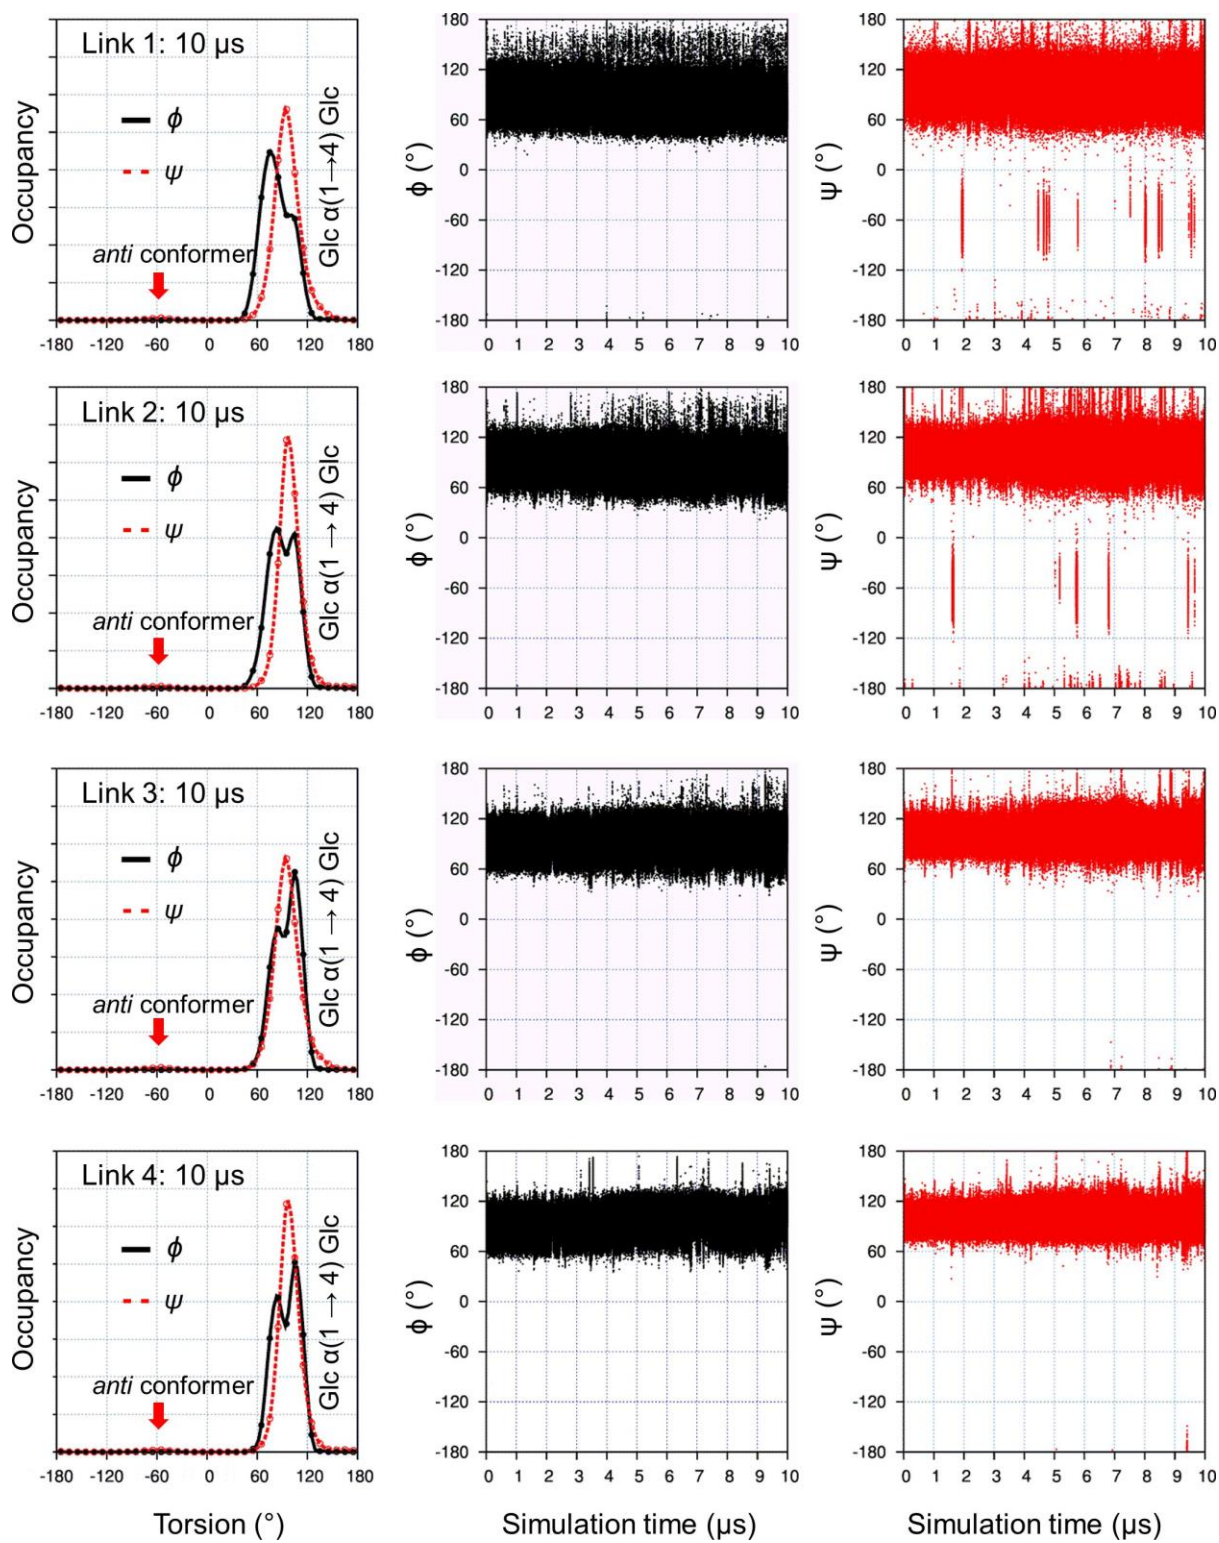

Figure S5. Linkage histograms & time series: 10  $\mu\text{s}$  simulation of **2** (antiparallel double-helix: strand B)

Glycosidic linkages are numbered from the reducing end; the *anti conformer* is noted

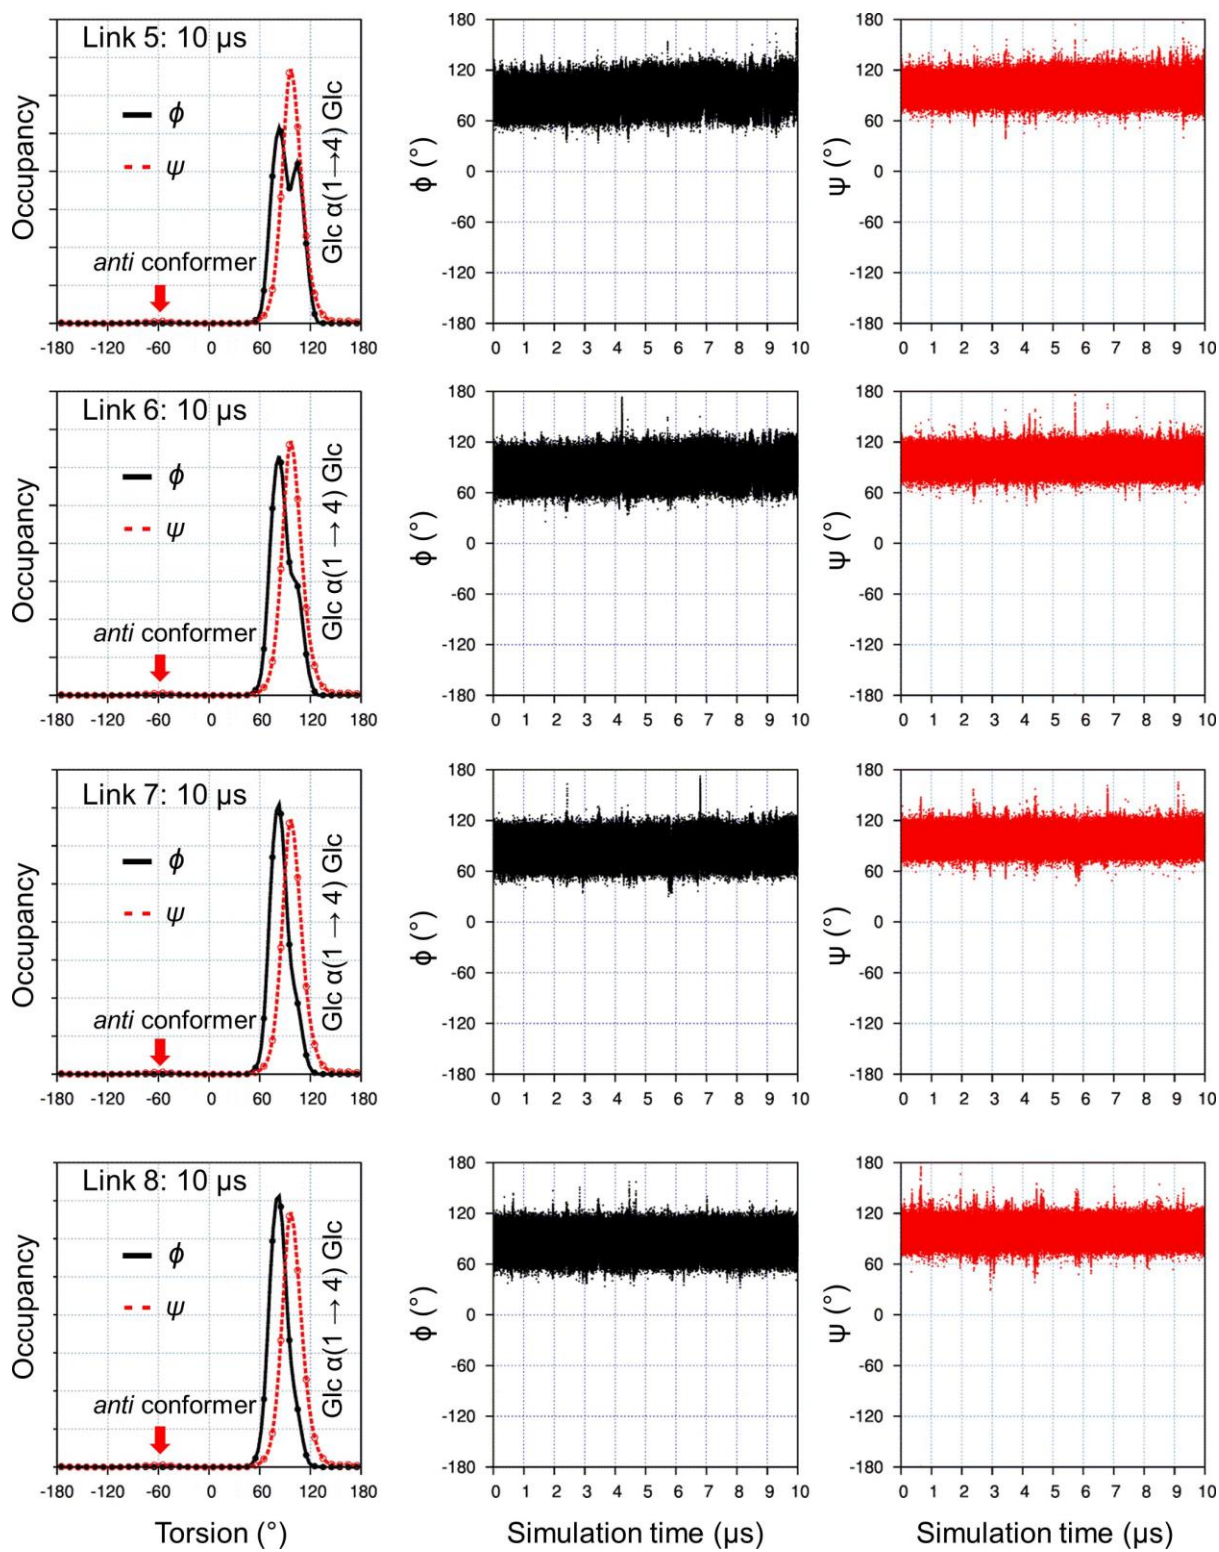

S5 continued

Figure S5. Linkage histograms & time series: 10  $\mu$ s simulation of **2** (antiparallel double-helix: strand B)

Glycosidic linkages are numbered from the reducing end; the *anti conformer* is noted

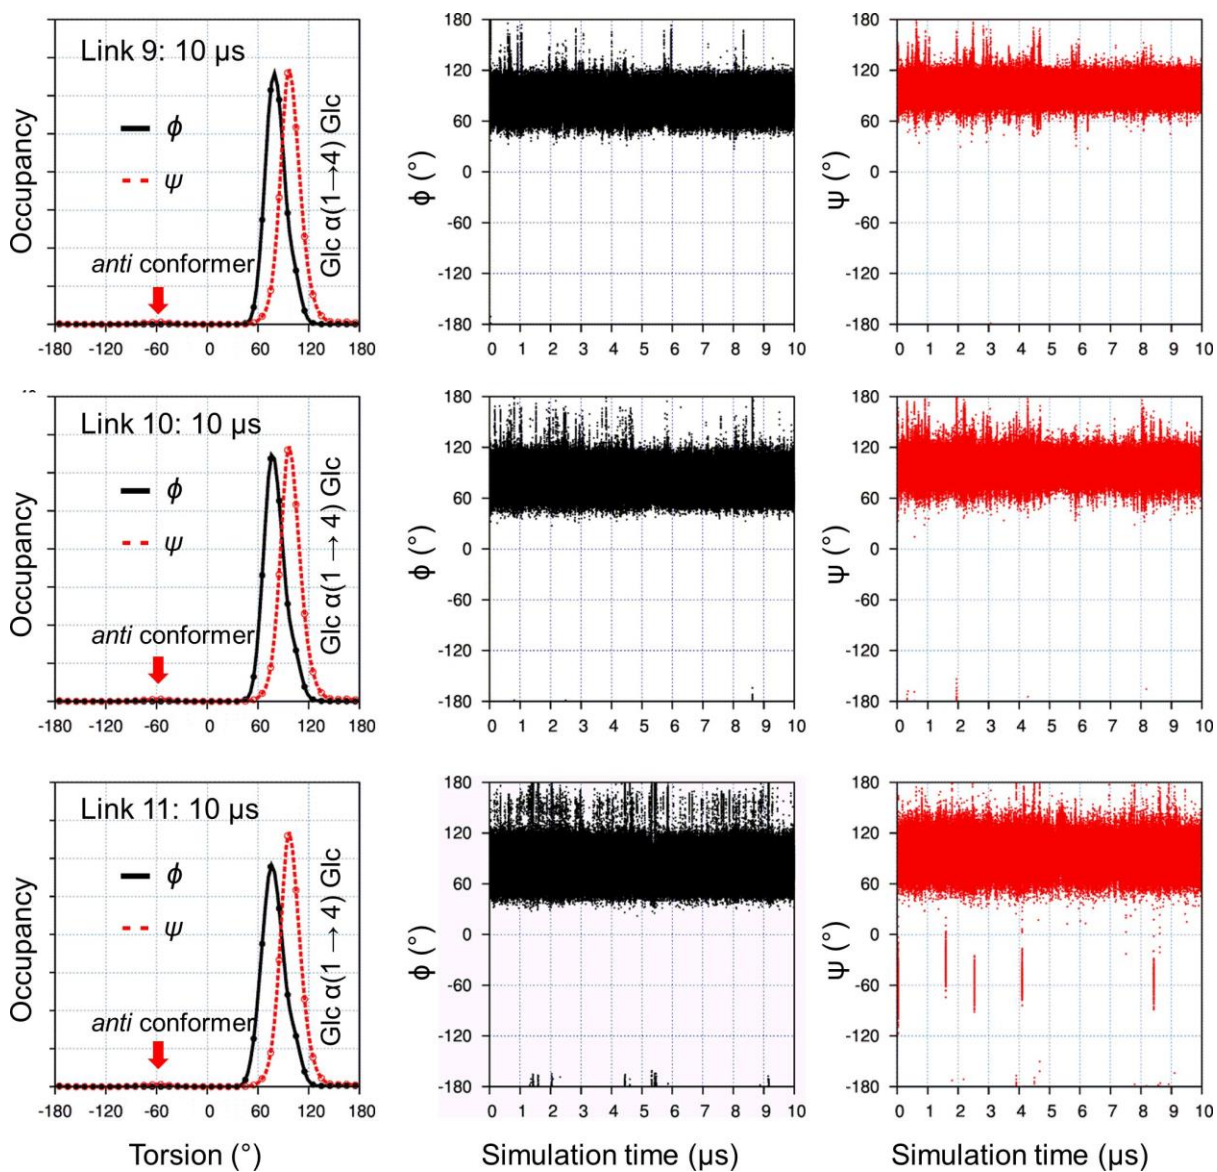

Figure S6. Linkage histograms & time series: 10  $\mu$ s simulation of **3** (parallel double-helix: strand A)

Glycosidic linkages are numbered from the reducing end; the *anti* conformer is noted

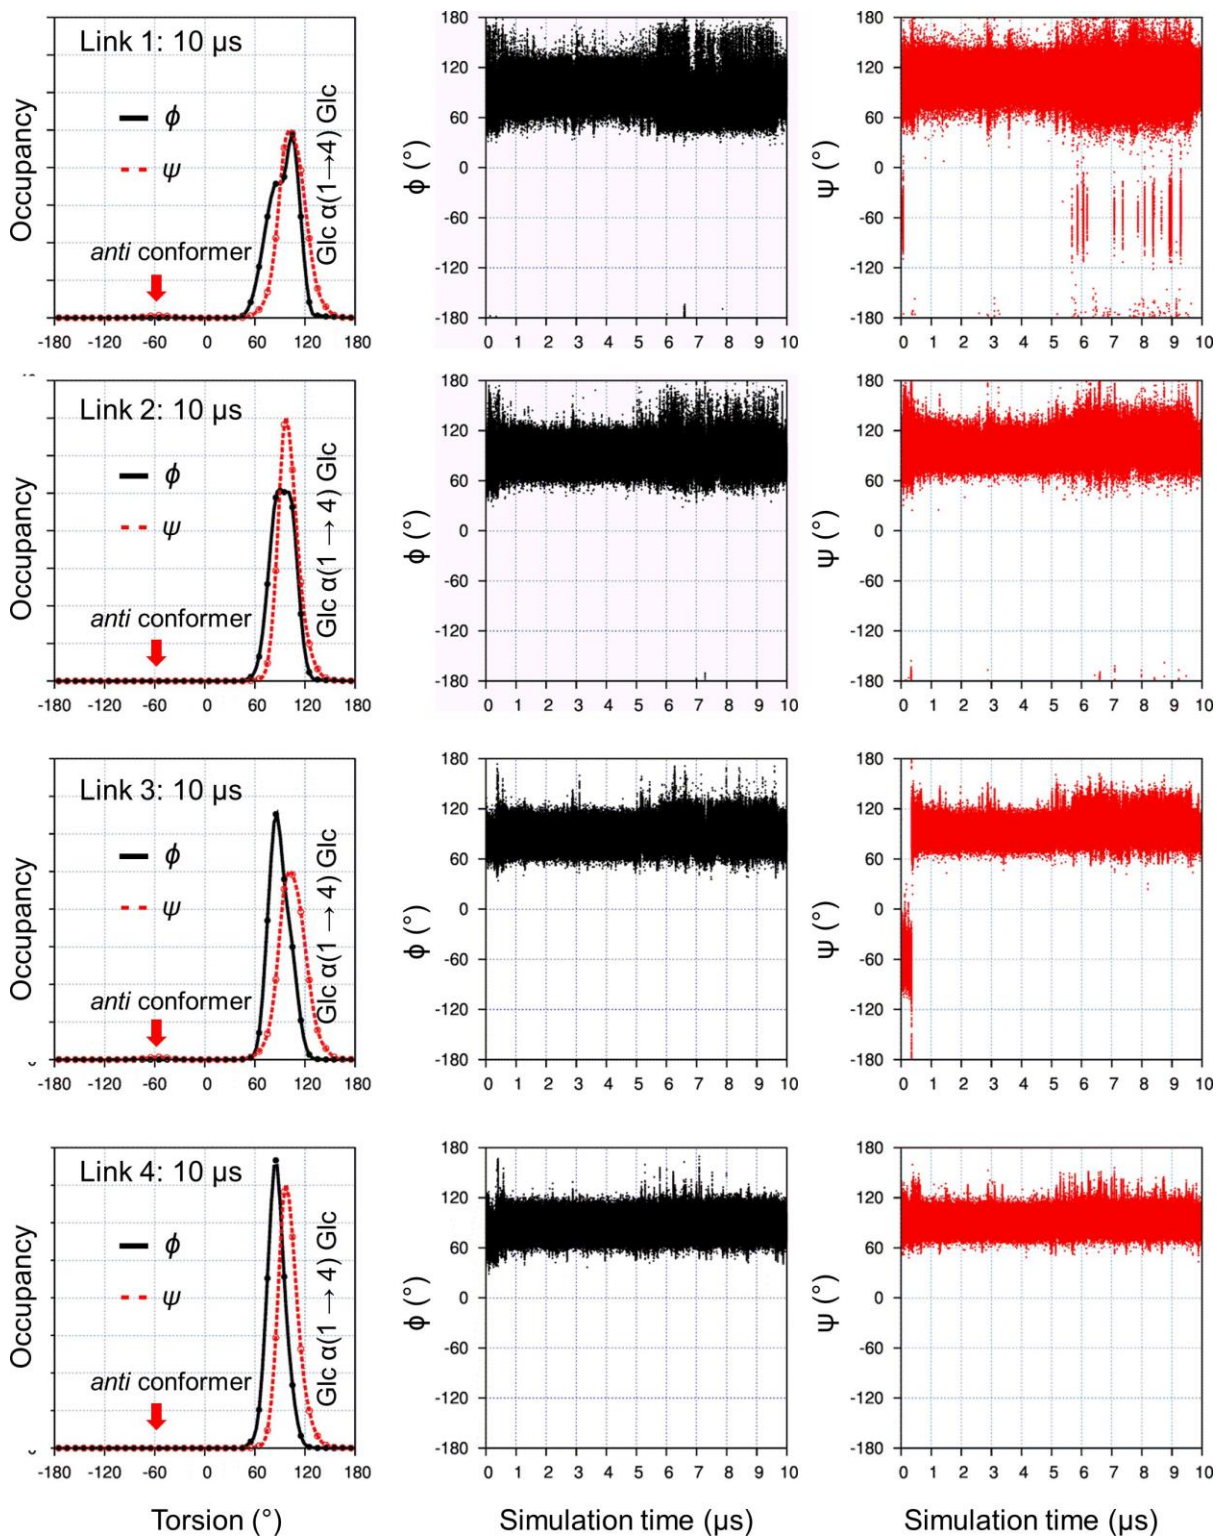

Figure S6. Linkage histograms & time series: 10  $\mu$ s simulation of **3** (parallel double-helix: strand A)

Glycosidic linkages are numbered from the reducing end; the *anti conformer* is noted

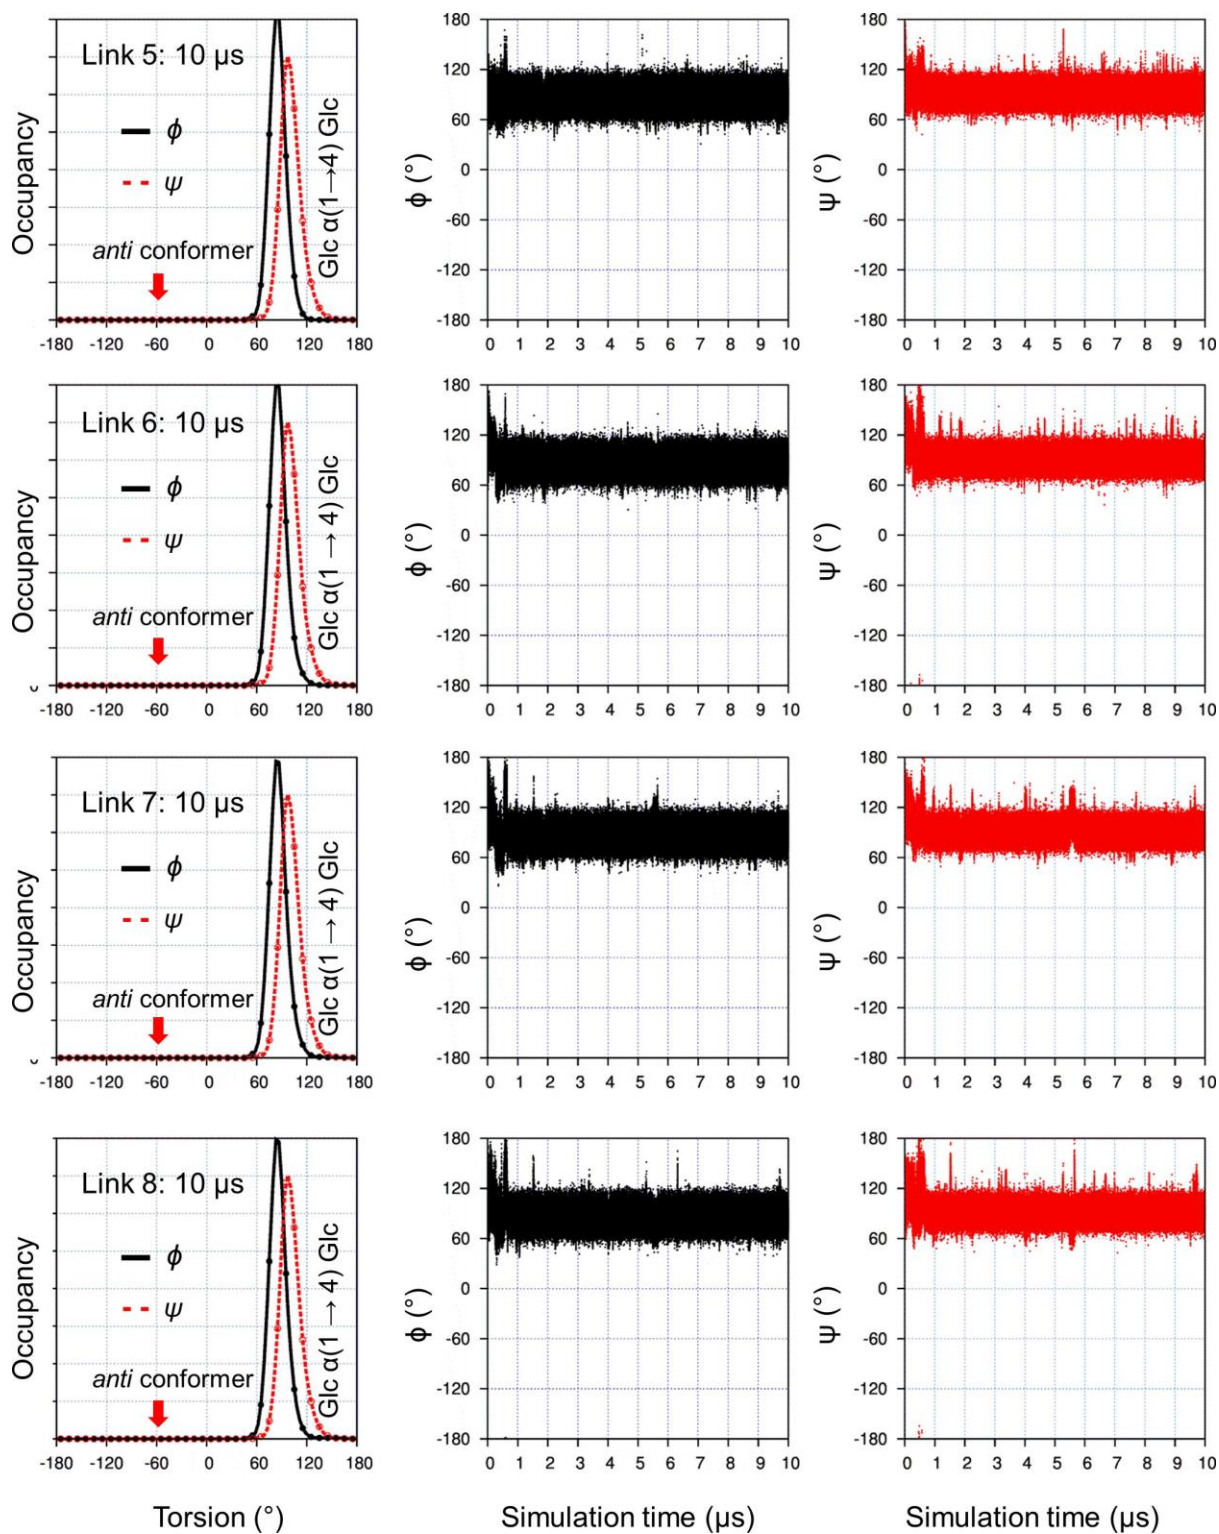

S6 continued

Figure S6. Linkage histograms & time series: 10  $\mu$ s simulation of **3** (parallel double-helix: strand A)

Glycosidic linkages are numbered from the reducing end; the *anti conformer* is noted

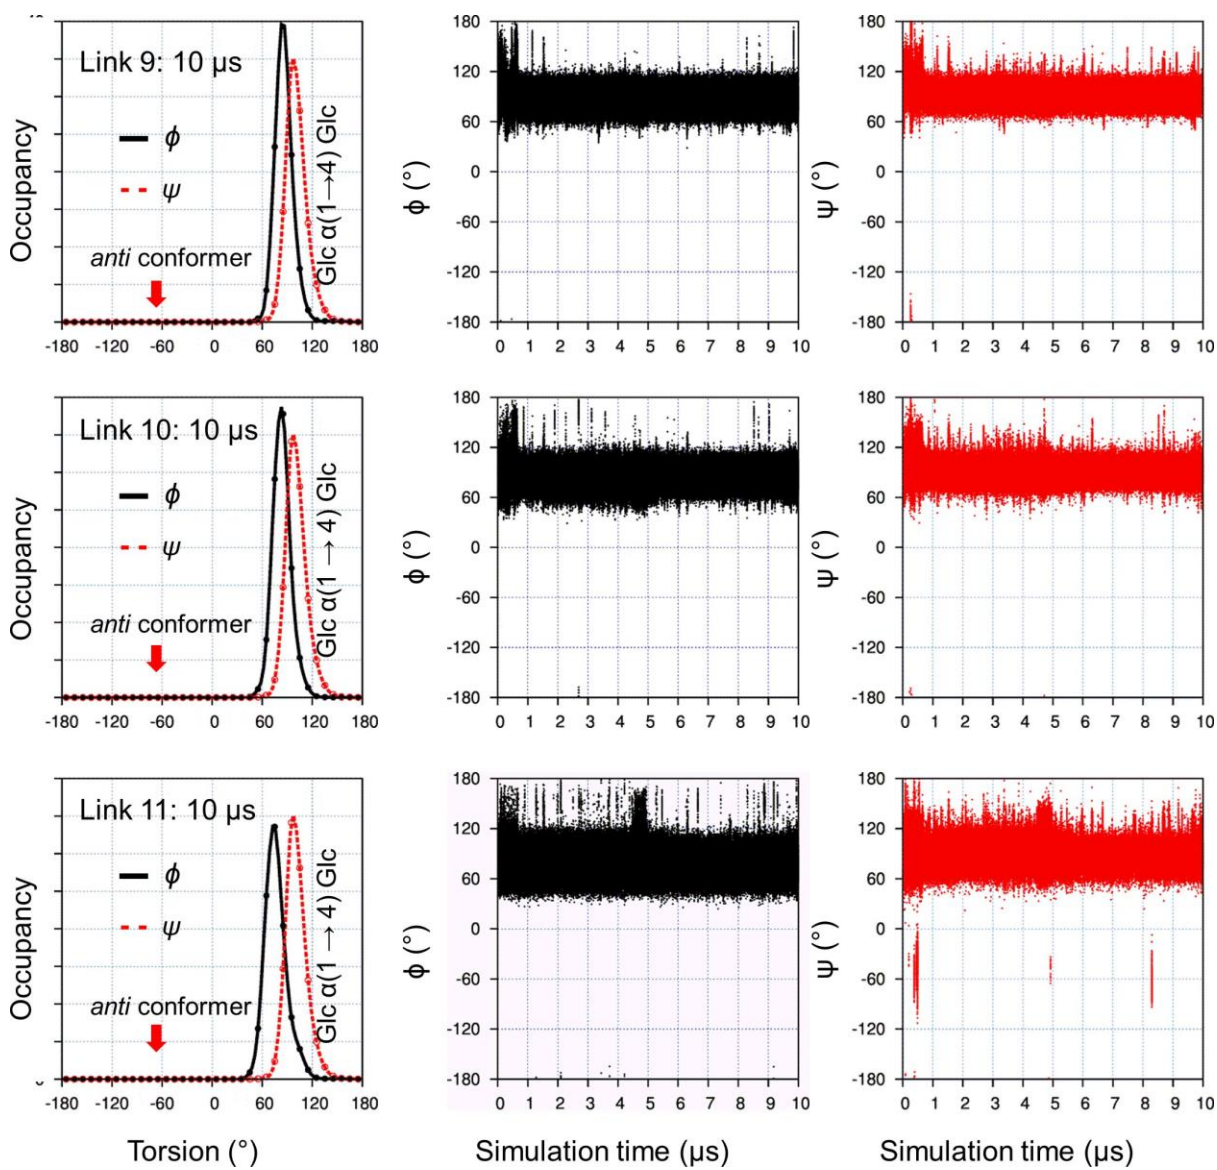

Figure S7. Linkage histograms & time series: 10  $\mu$ s simulation of **3** (parallel double-helix: strand B)

Glycosidic linkages are numbered from the reducing end; the *anti conformer* is noted

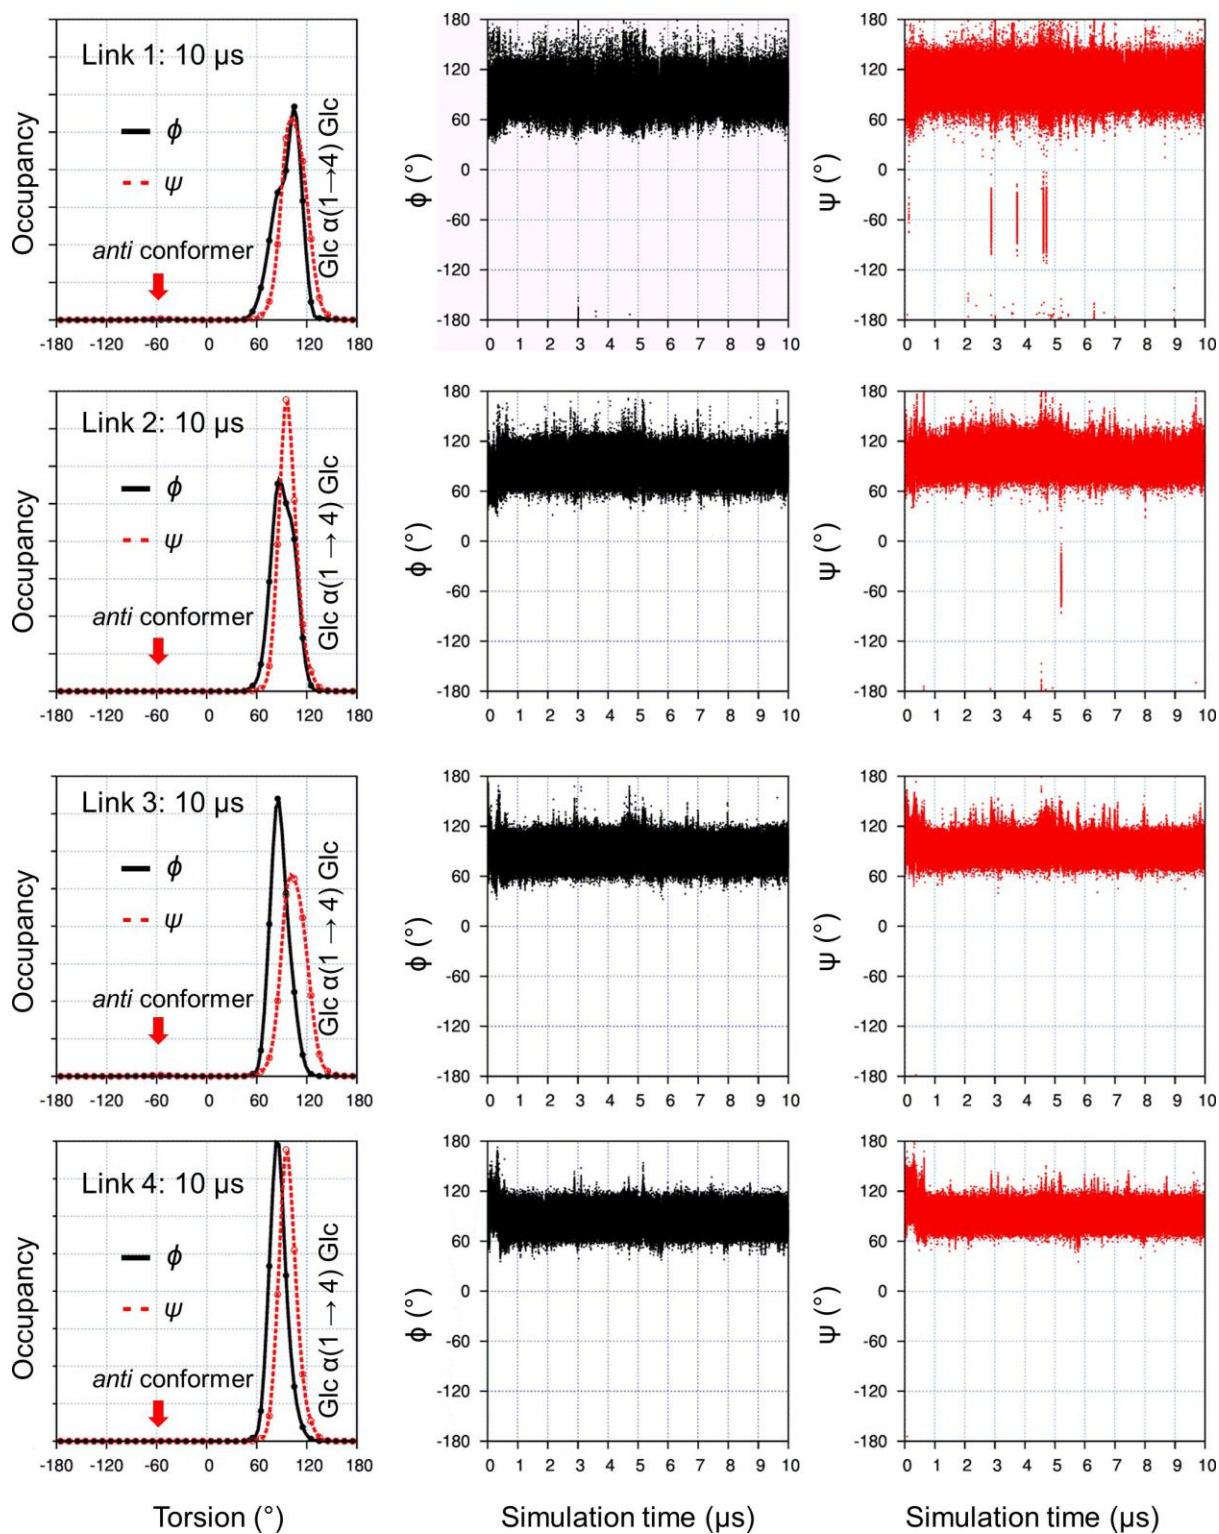

Figure S7. Linkage histograms & time series: 10  $\mu$ s simulation of **3** (parallel double-helix: strand B)

Glycosidic linkages are numbered from the reducing end; the *anti conformer* is noted

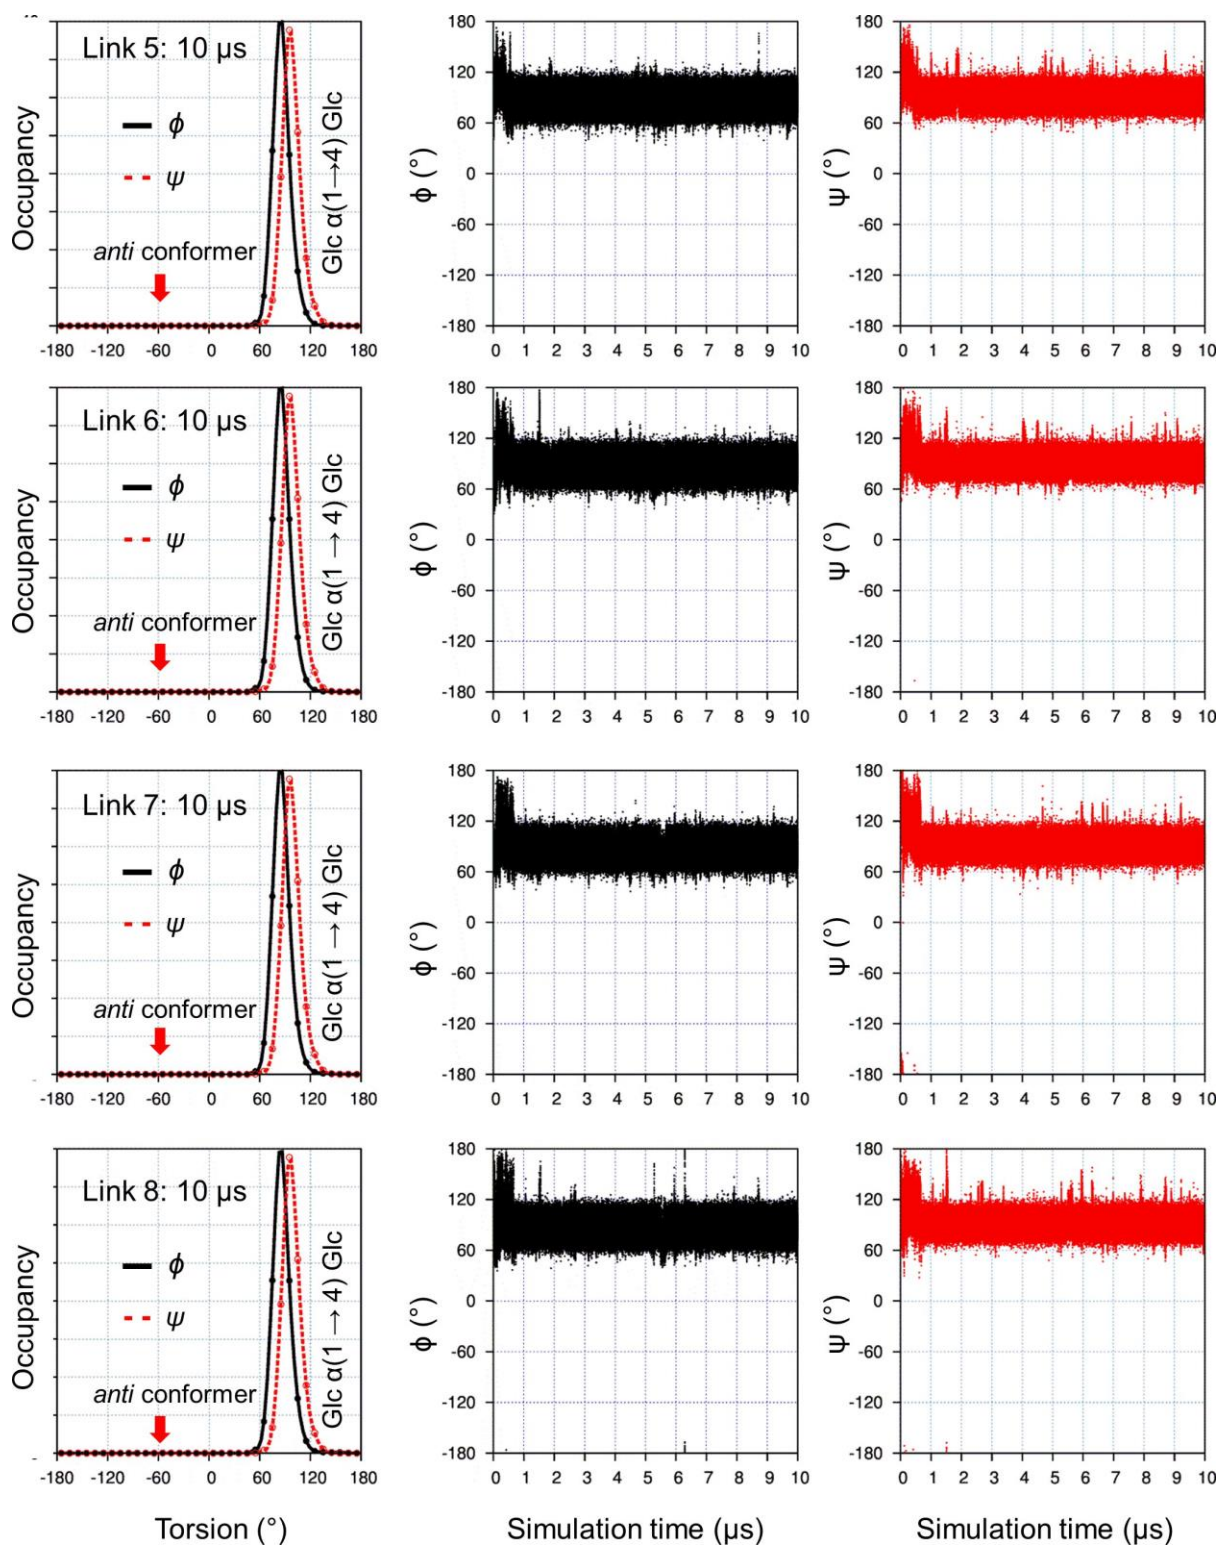

S7 continued



Figure S7. Linkage histograms & time series: 10  $\mu\text{s}$  simulation of **3** (parallel double-helix: strand B)

Glycosidic linkages are numbered from the reducing end; the *anti conformer* is noted

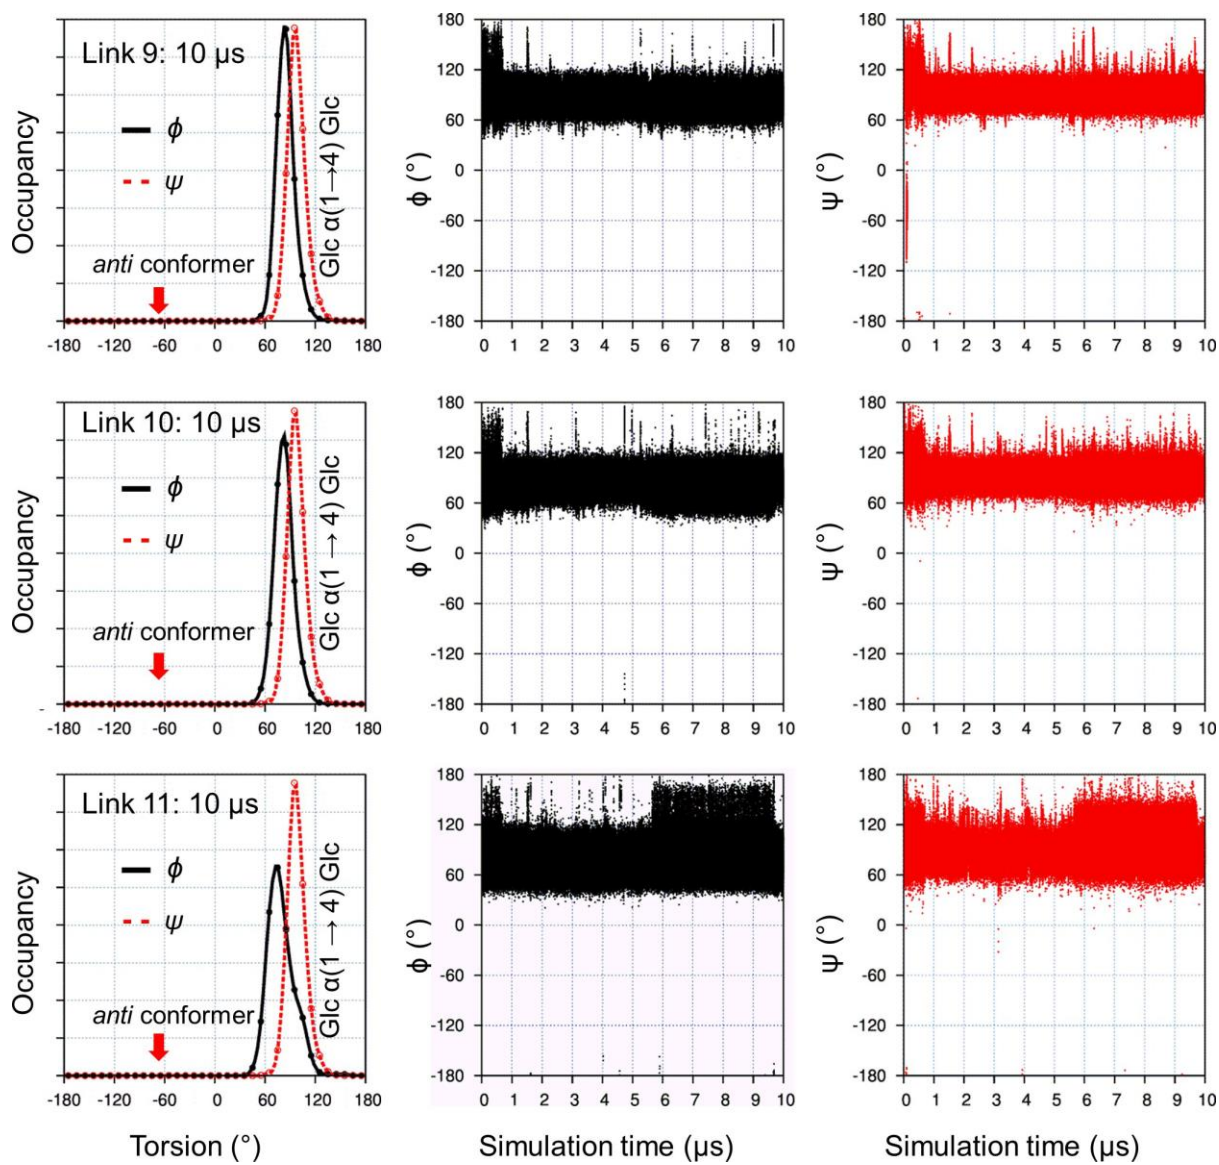

Figure S8. Linkage histograms & time series: 10  $\mu$ s simulation of 4 (hexasaccharide)

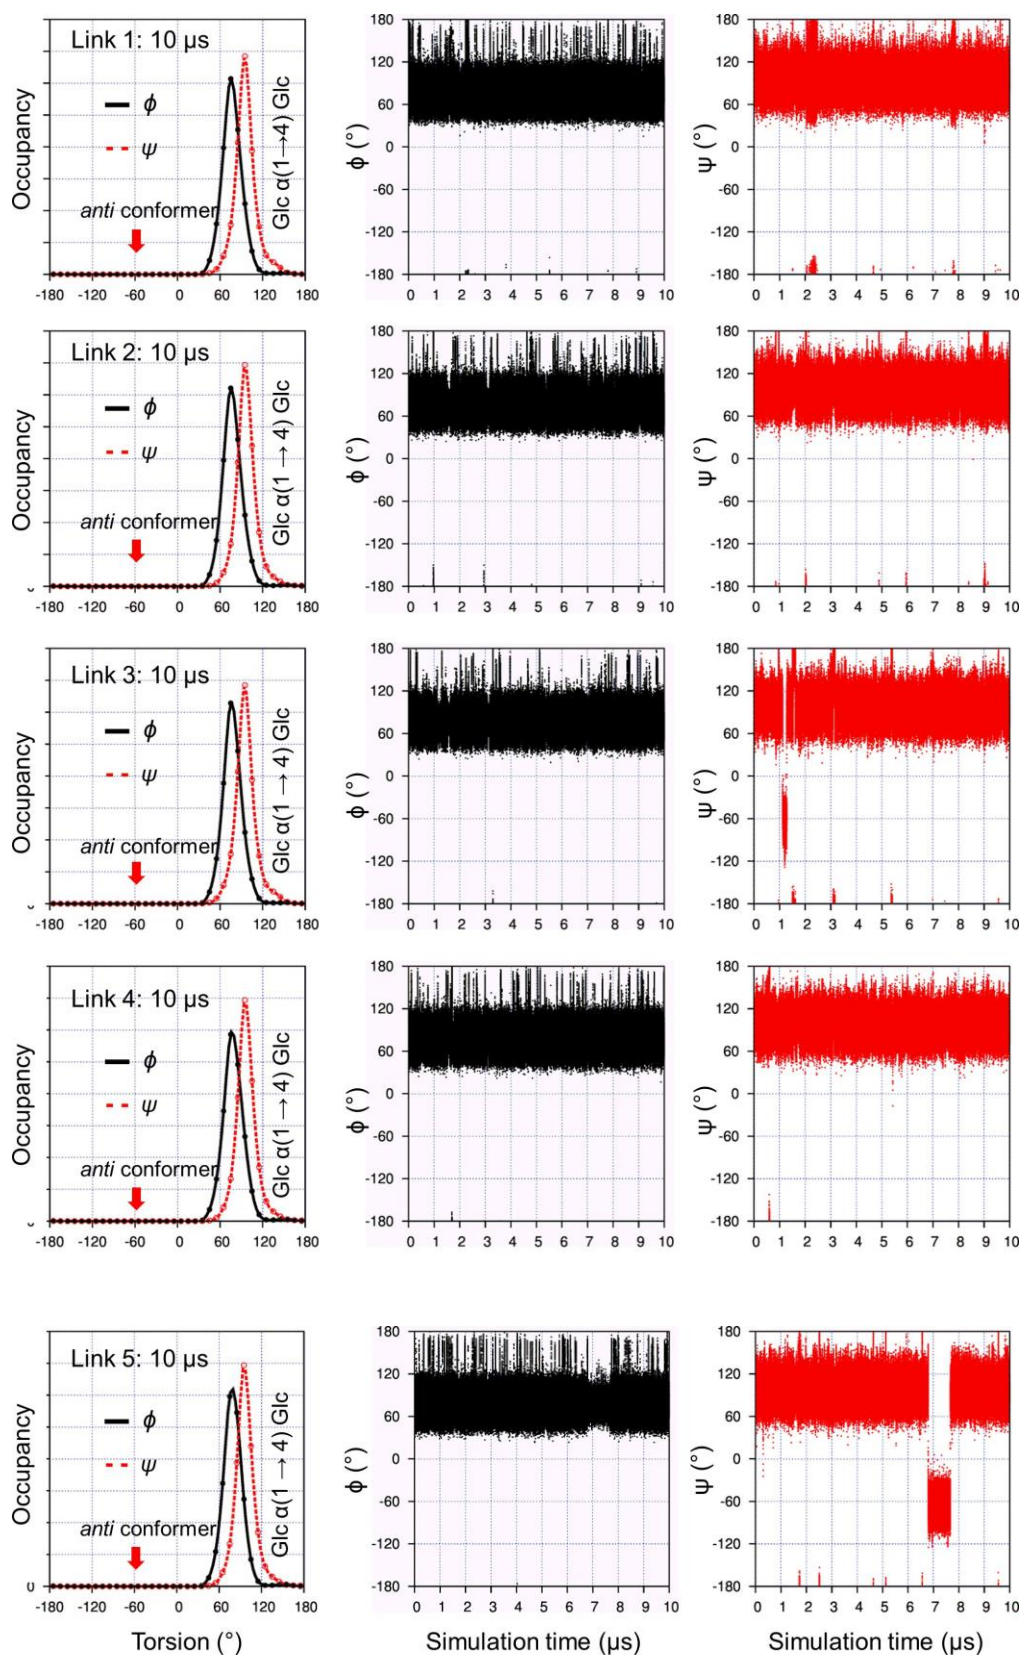

Figure S9. Linkage histograms & time series: 20  $\mu\text{s}$  simulation of **5** (trisaccharide)

Glycosidic linkages are numbered from the reducing end; the *anti* conformer is noted

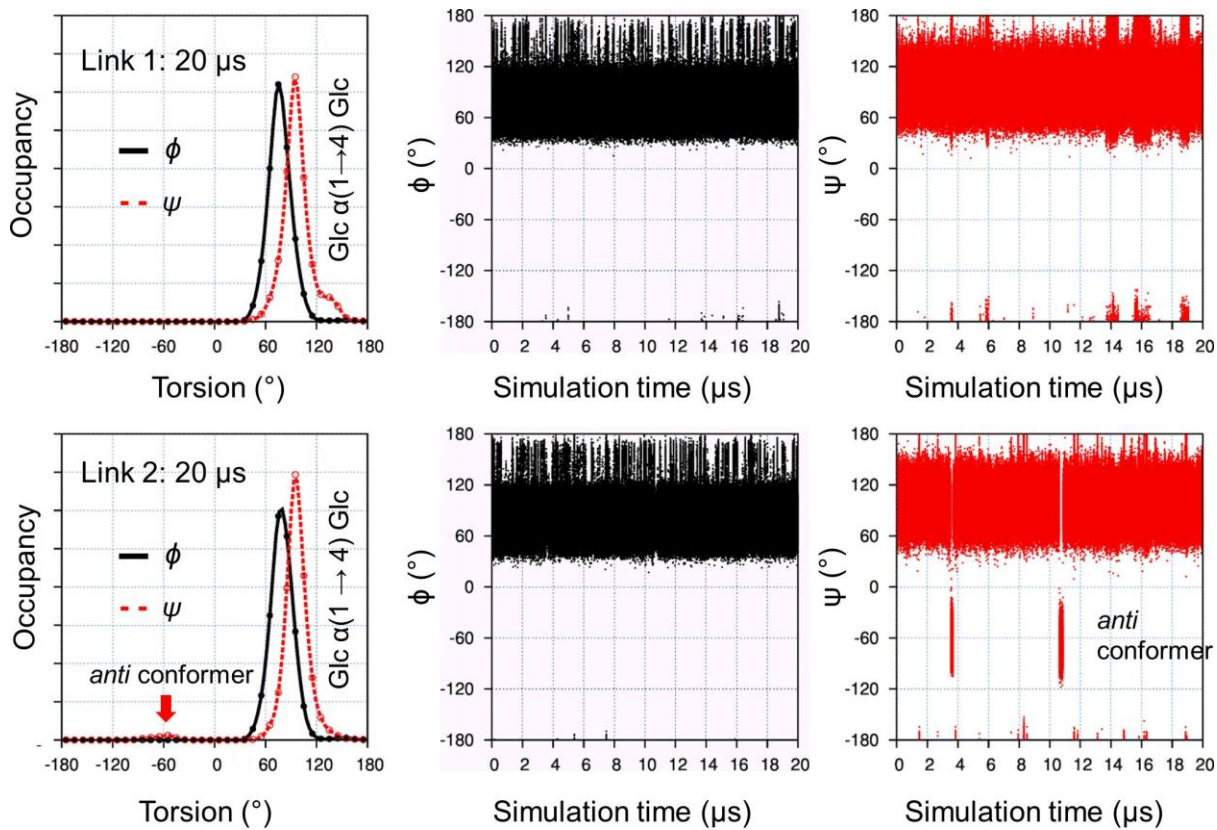

Figure S10. Linkage free energy surfaces: 10  $\mu$ s simulation of **1** (dodecasaccharide)

Glycosidic linkages are numbered from the reducing end; contours at 2, 4 and 6 kcal mol<sup>-1</sup>

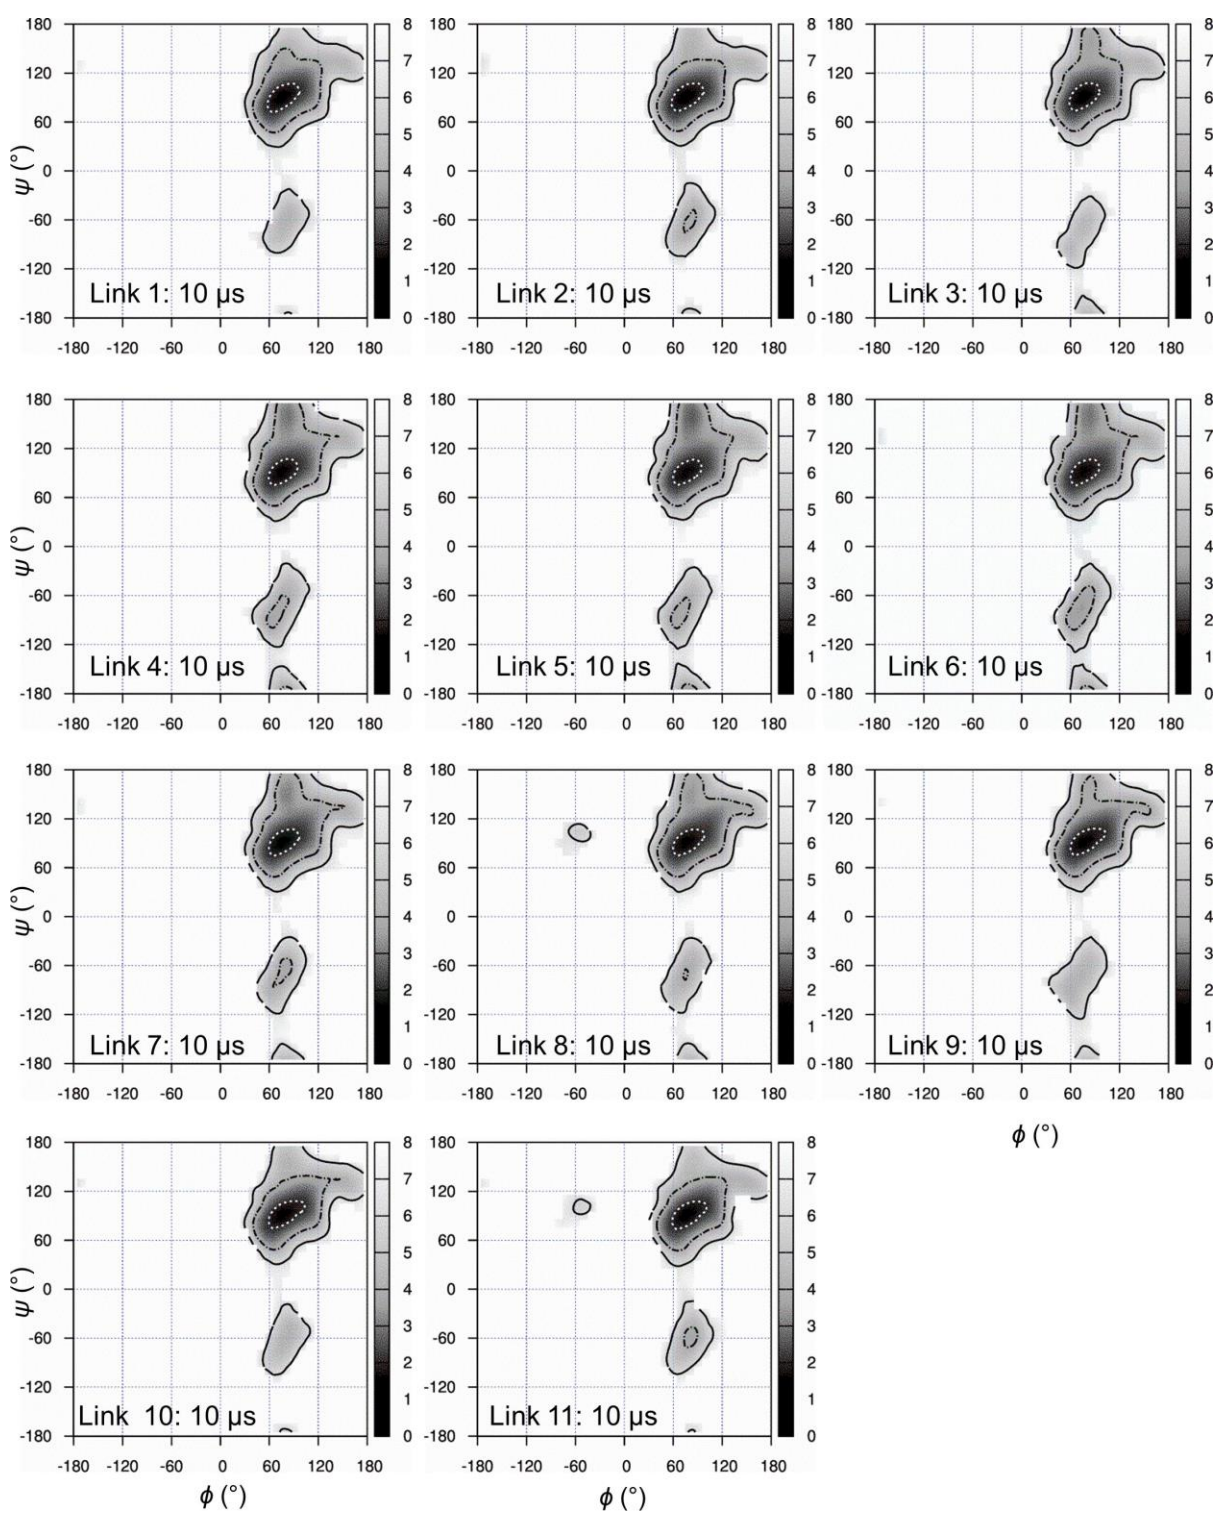

Figure S11. Linkage free energy surfaces: 10  $\mu$ s simulation of **2** (antiparallel double-helix: strand A)

Glycosidic linkages are numbered from the reducing end; contours at 2, 4 and 6 kcal mol<sup>-1</sup>

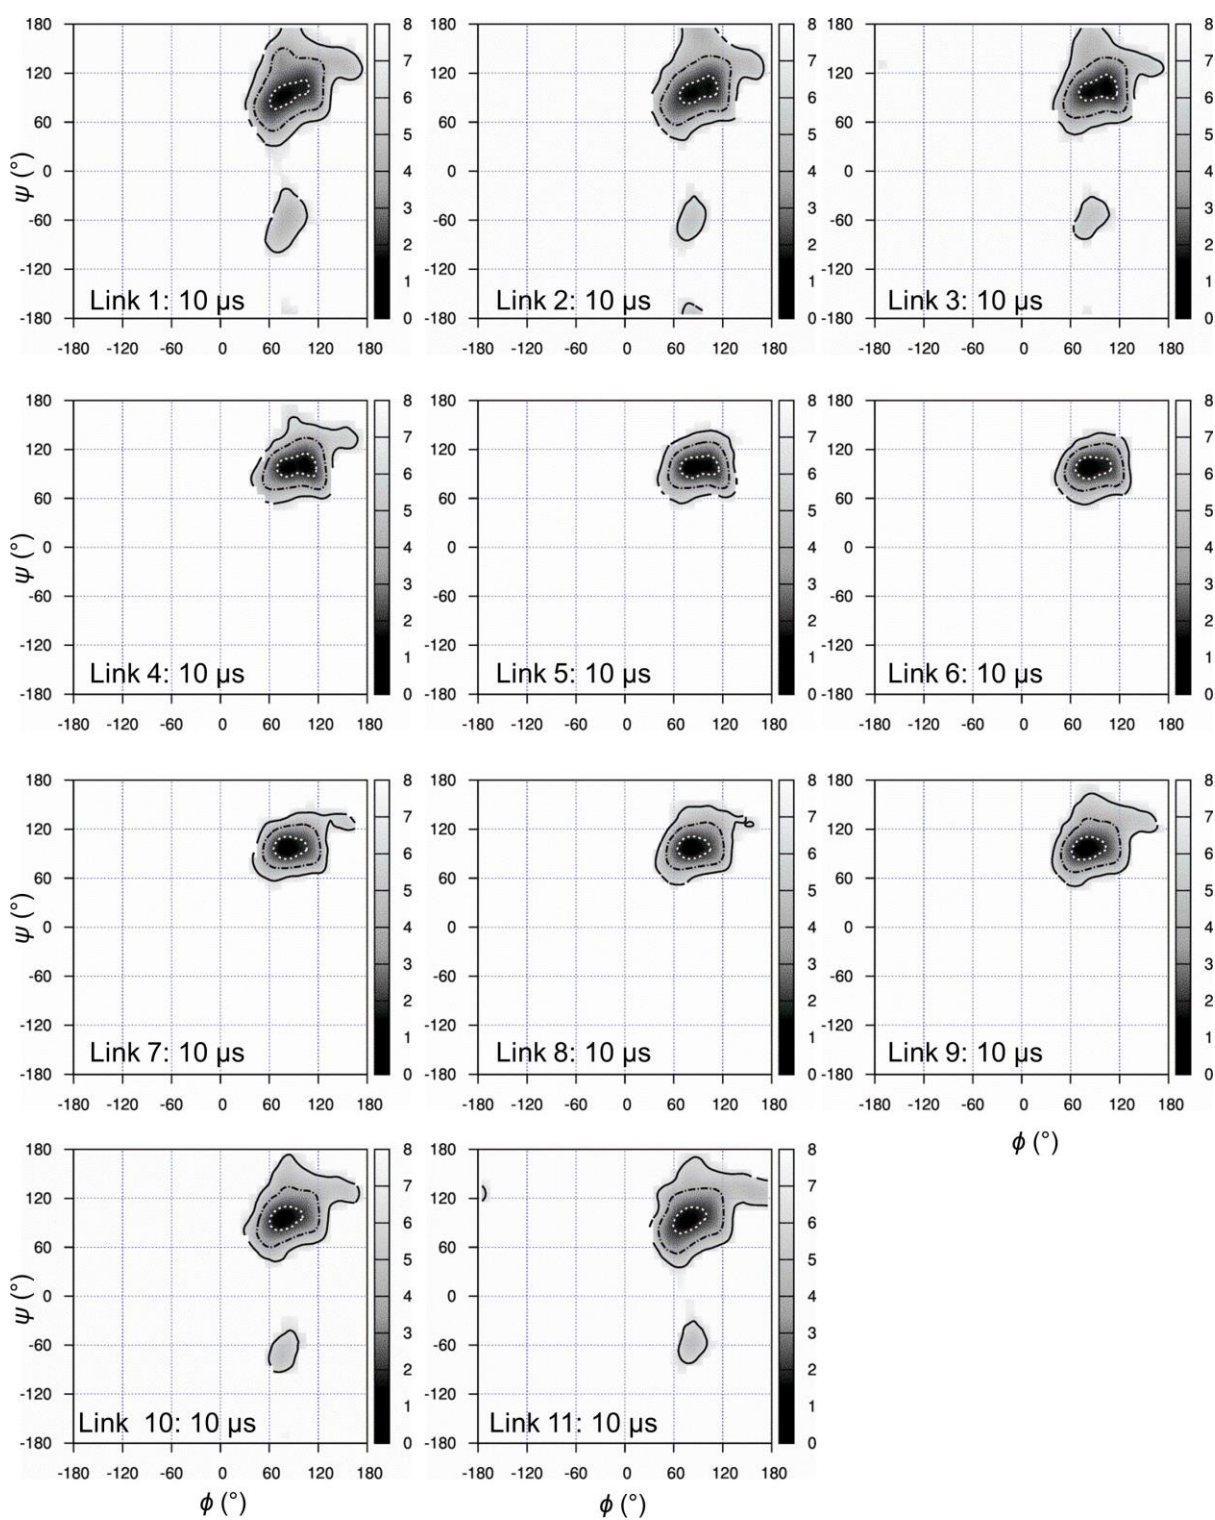

Figure S11. Linkage free energy surfaces: 10  $\mu$ s simulation of **2** (antiparallel double-helix: strand B)

Glycosidic linkages are numbered from the reducing end; contours at 2, 4 and 6 kcal mol<sup>-1</sup>

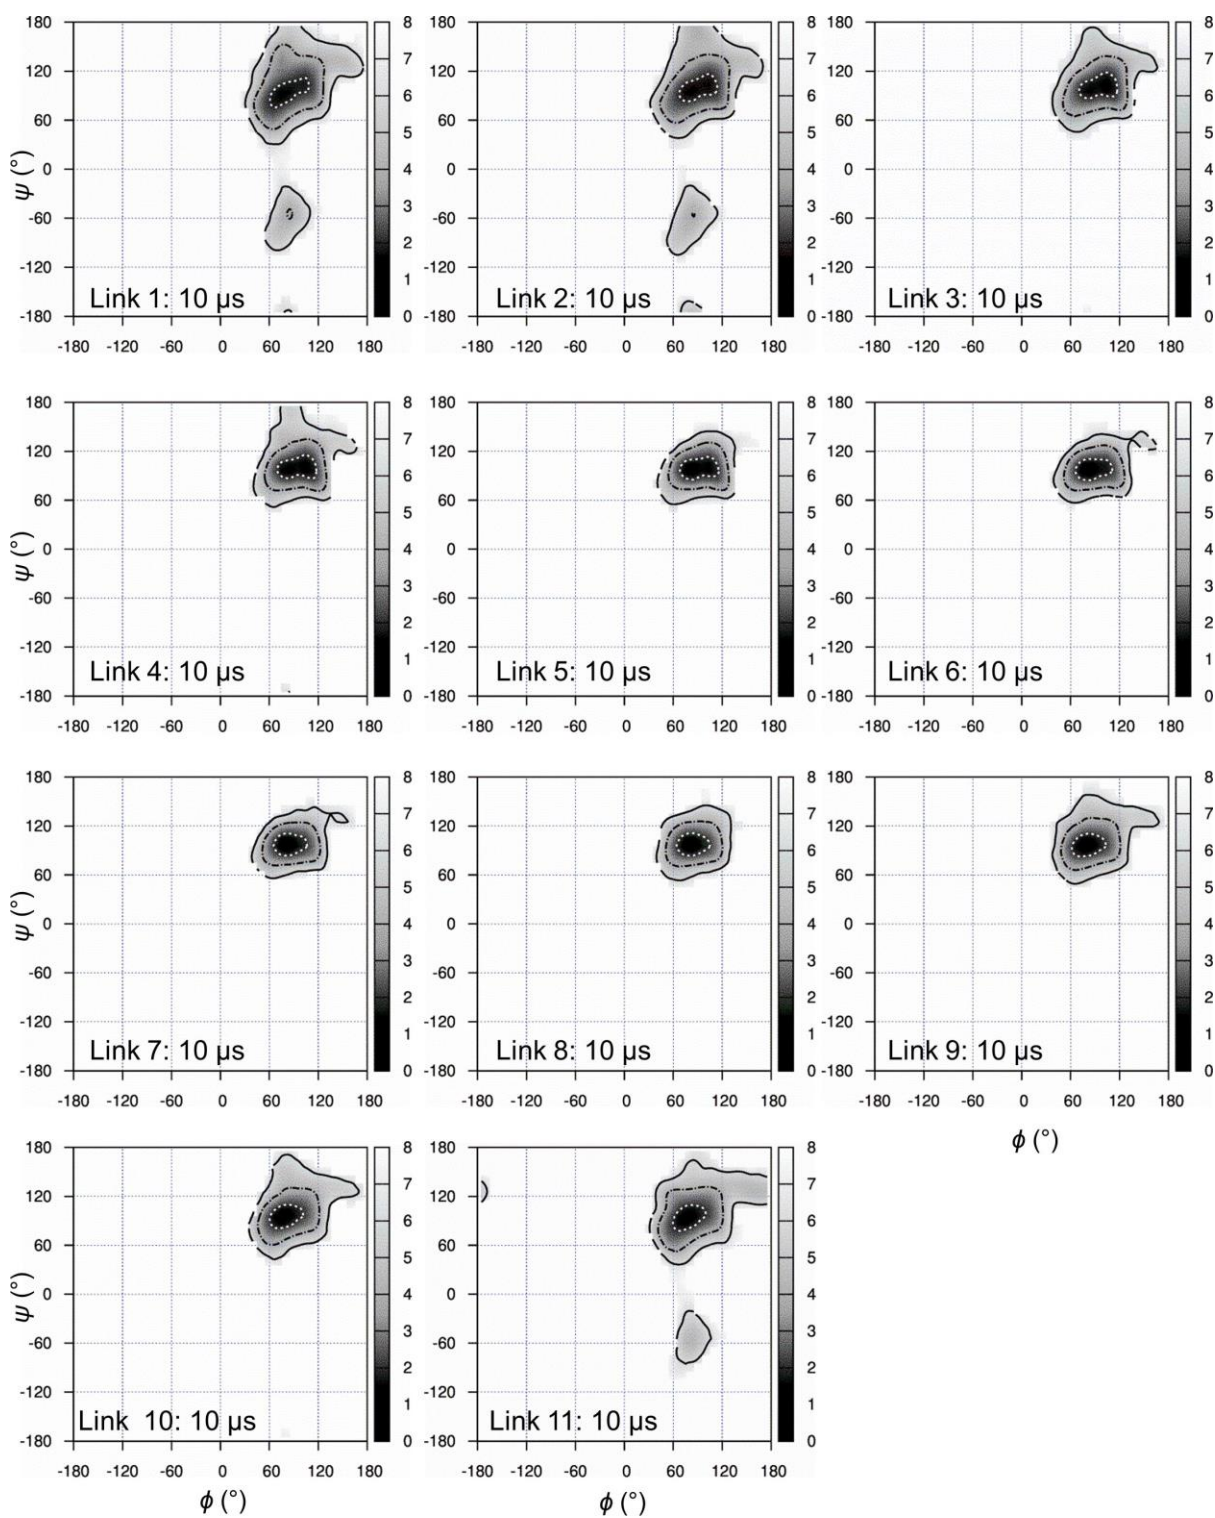

S11 continued

Figure S12. Linkage free energy surfaces: 10  $\mu$ s simulation of **3** (parallel double-helix: strand A)

Glycosidic linkages are numbered from the reducing end; contours at 2, 4 and 6 kcal mol<sup>-1</sup>

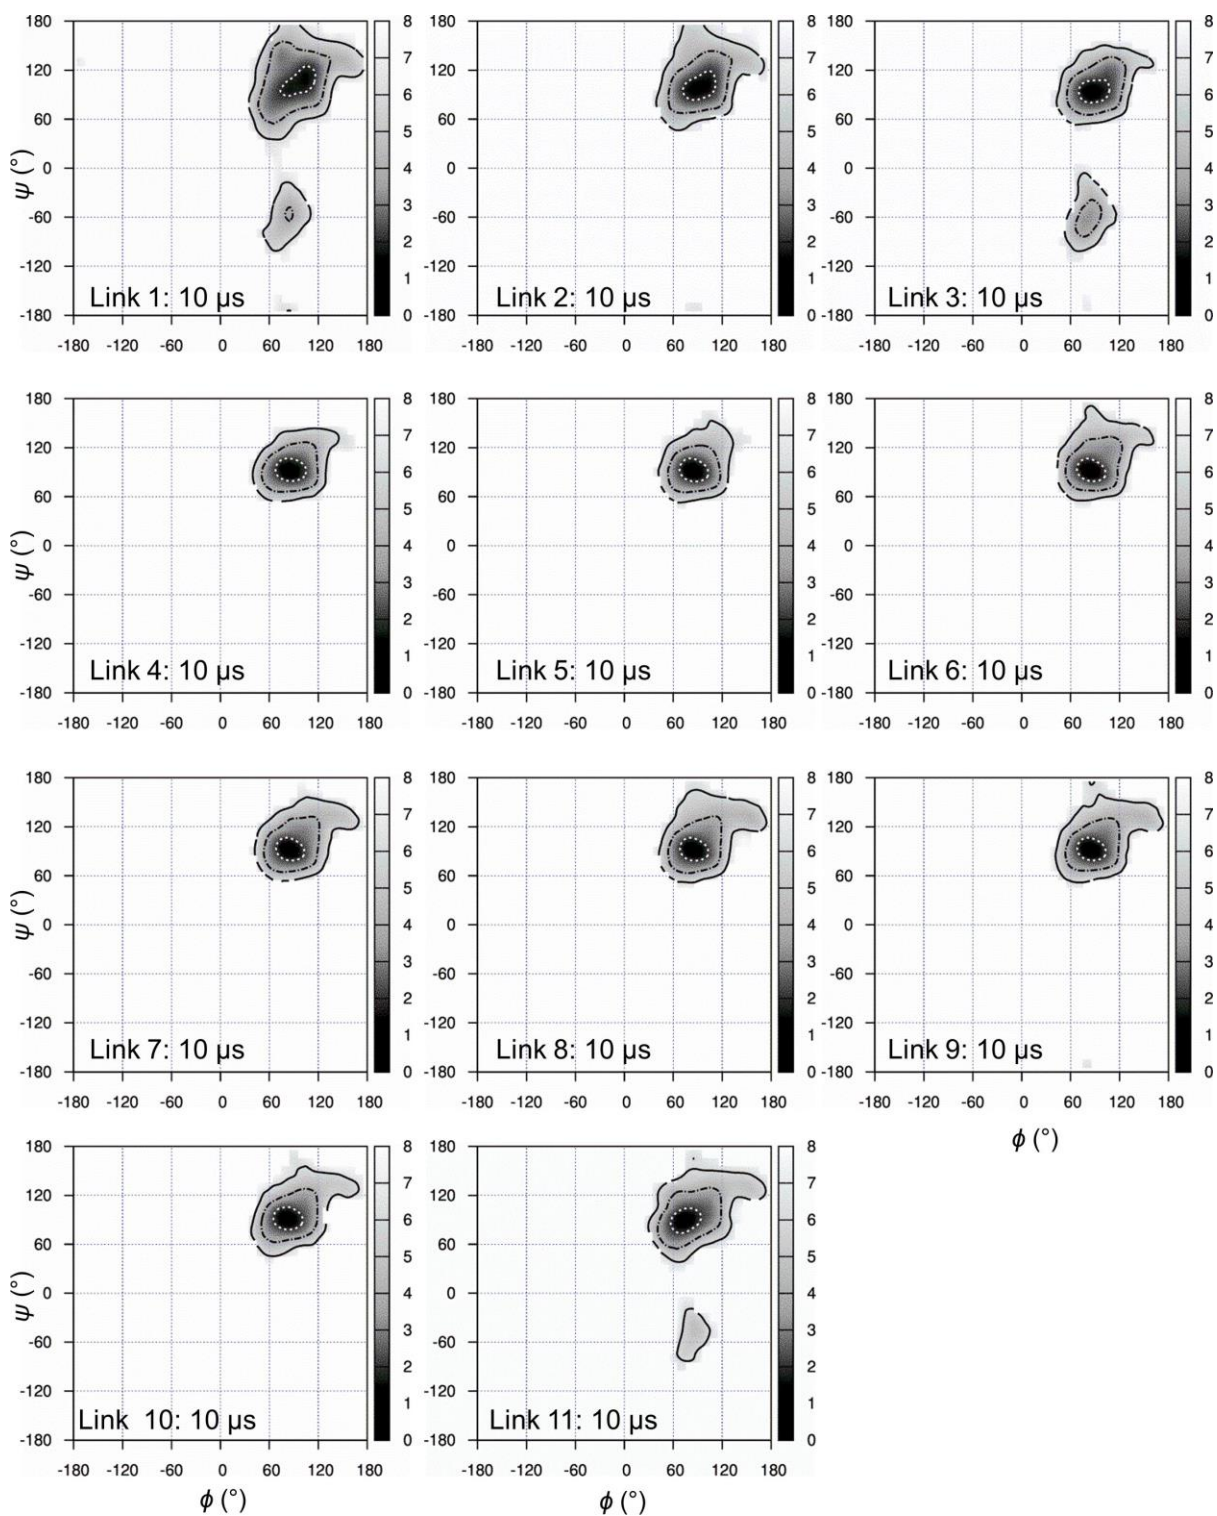

Figure S12. Linkage free energy surfaces: 10  $\mu$ s simulation of **3** (parallel double-helix: strand B)

Glycosidic linkages are numbered from the reducing end; contours at 2, 4 and 6 kcal mol<sup>-1</sup>

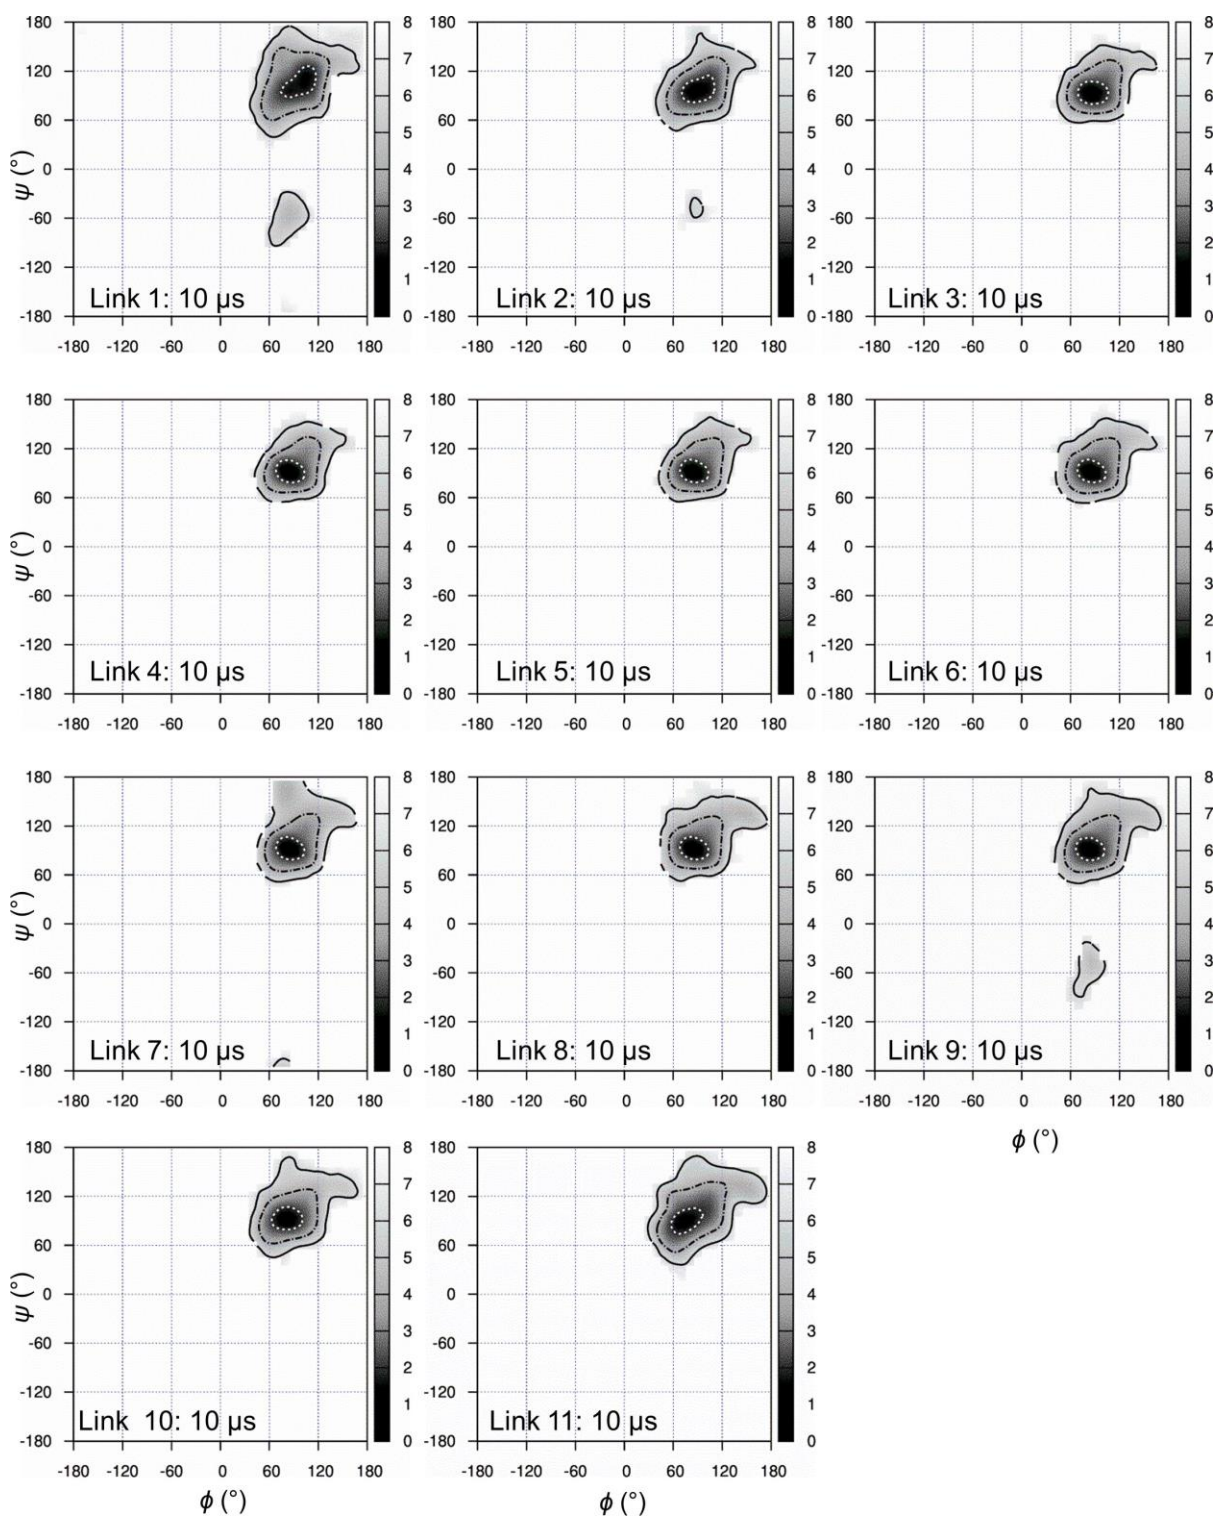

S12 continued



Figure S13. Linkage free energy surfaces:  $\mu$ s simulations of **4** (hexasaccharide) and **5** (trisaccharide)

Glycosidic linkages are numbered from the reducing end; contours at 2, 4 and 6 kcal mol<sup>-1</sup>

(4)

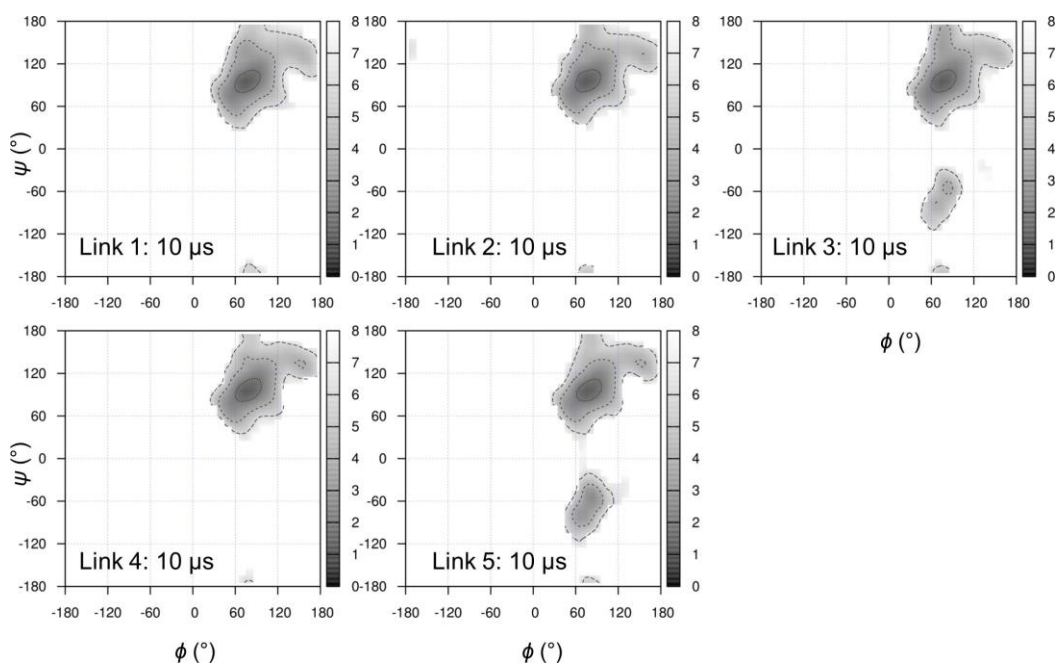

(5)

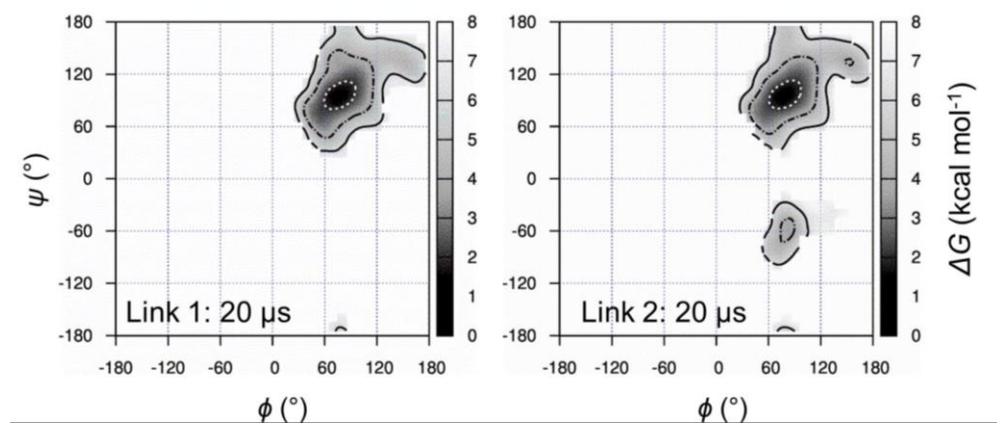

Figure S14. Puckering convergence, time series and sinusoidal projections: 10  $\mu\text{s}$  simulation of **1**

Red line denotes simulation average; Glc pyranose rings are numbered from the reducing end

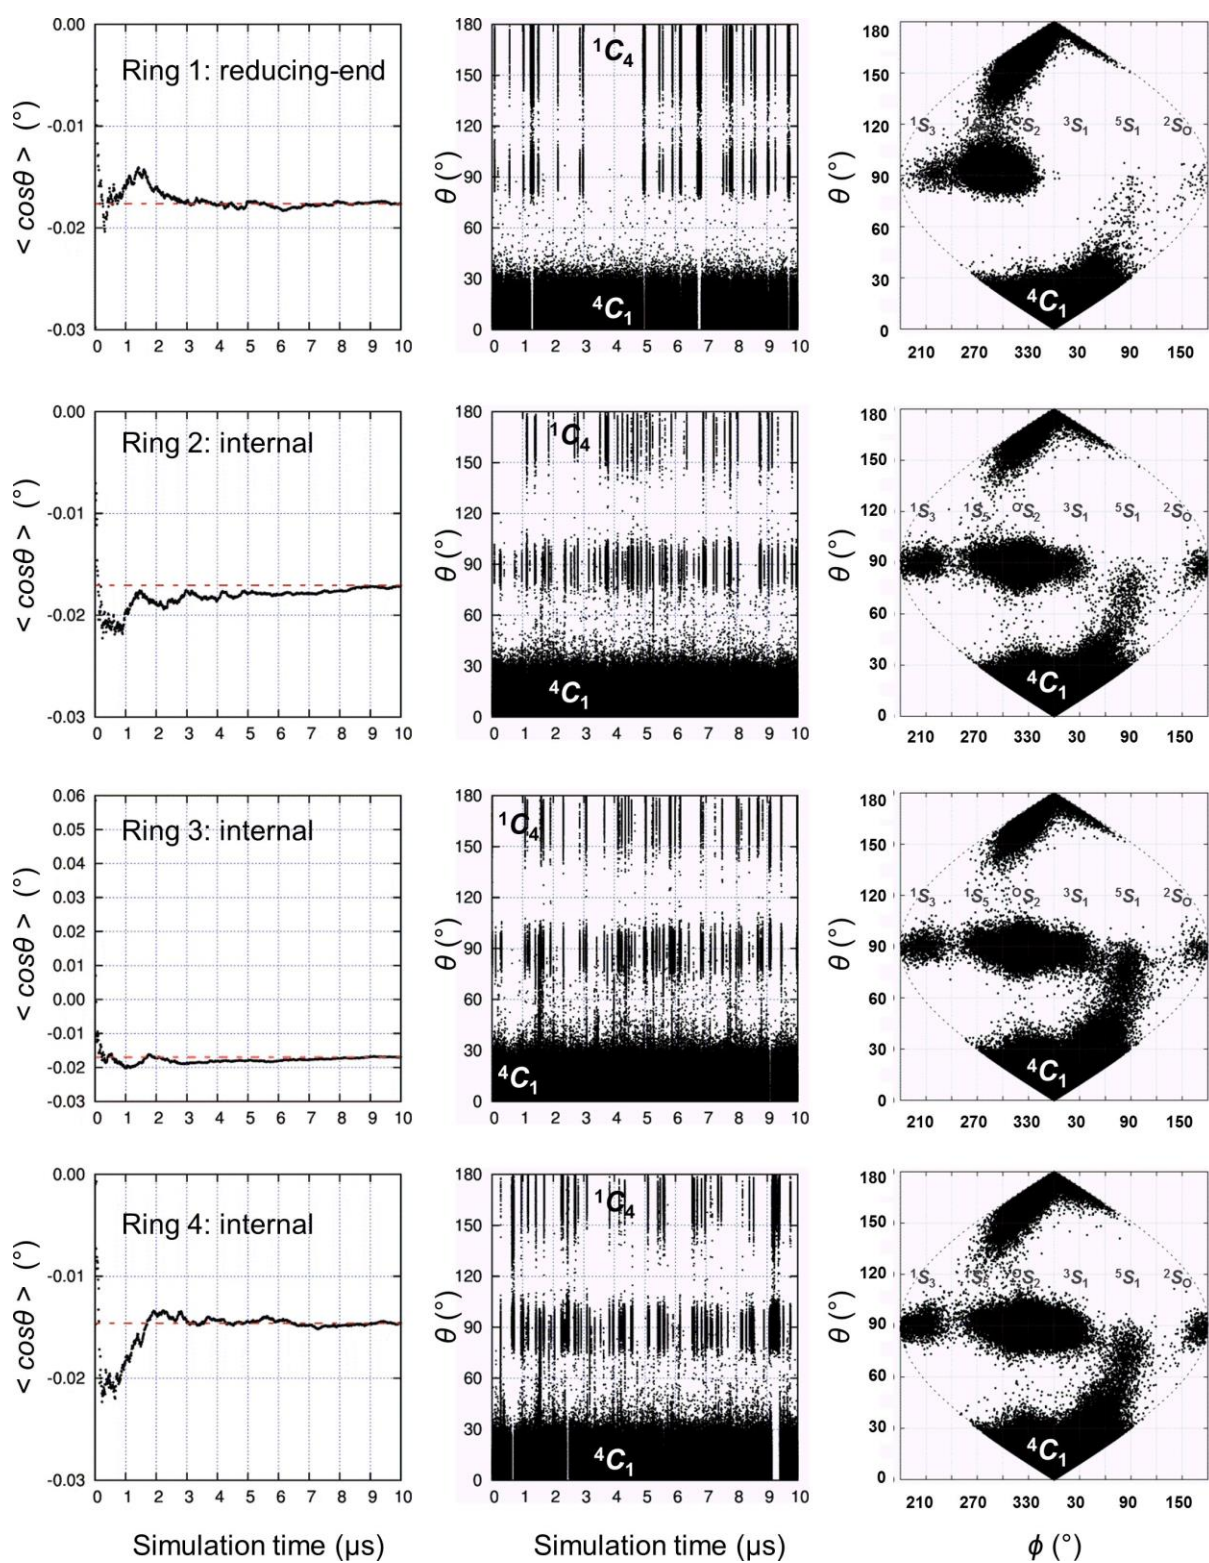

Figure S14. Puckering convergence, time series and sinusoidal projections: 10  $\mu\text{s}$  simulation of **1**

Red line denotes simulation average; Glc pyranose rings are numbered from the reducing end

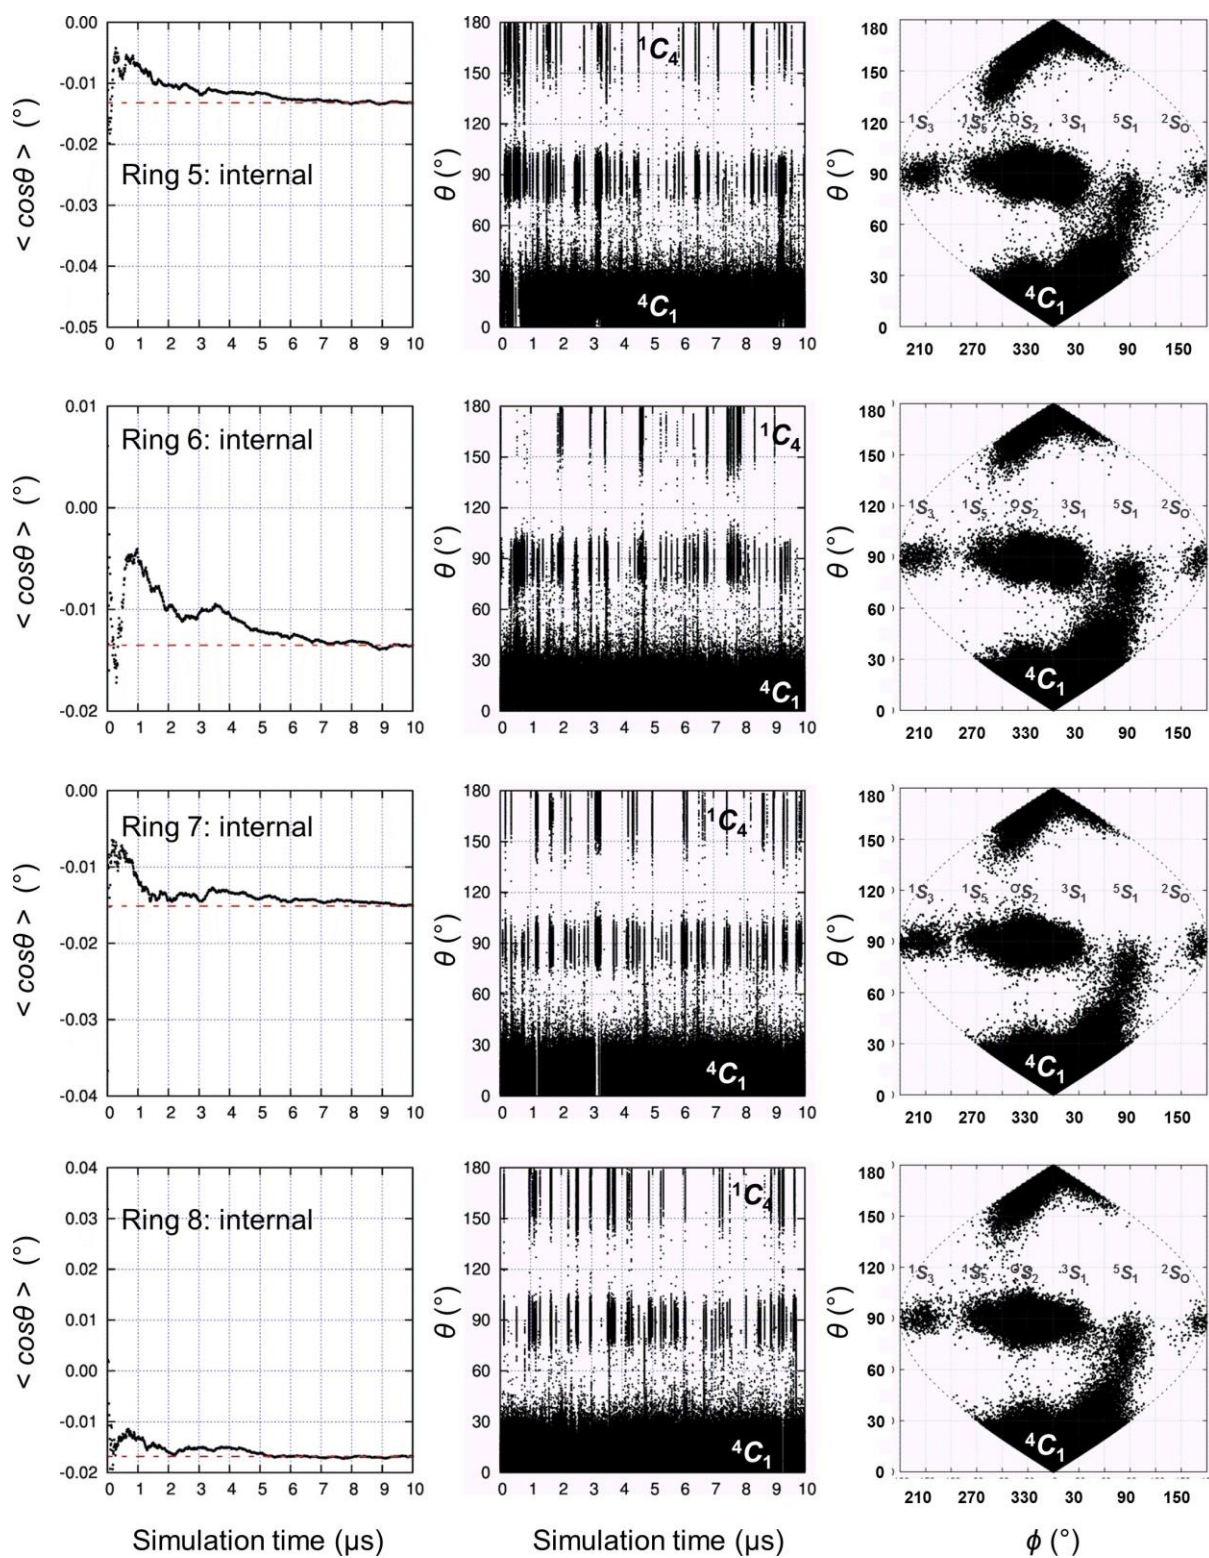

S14 continued

Figure S14. Puckering convergence, time series and sinusoidal projections: 10  $\mu\text{s}$  simulation of **1**

Red line denotes simulation average; Glc pyranose rings are numbered from the reducing end

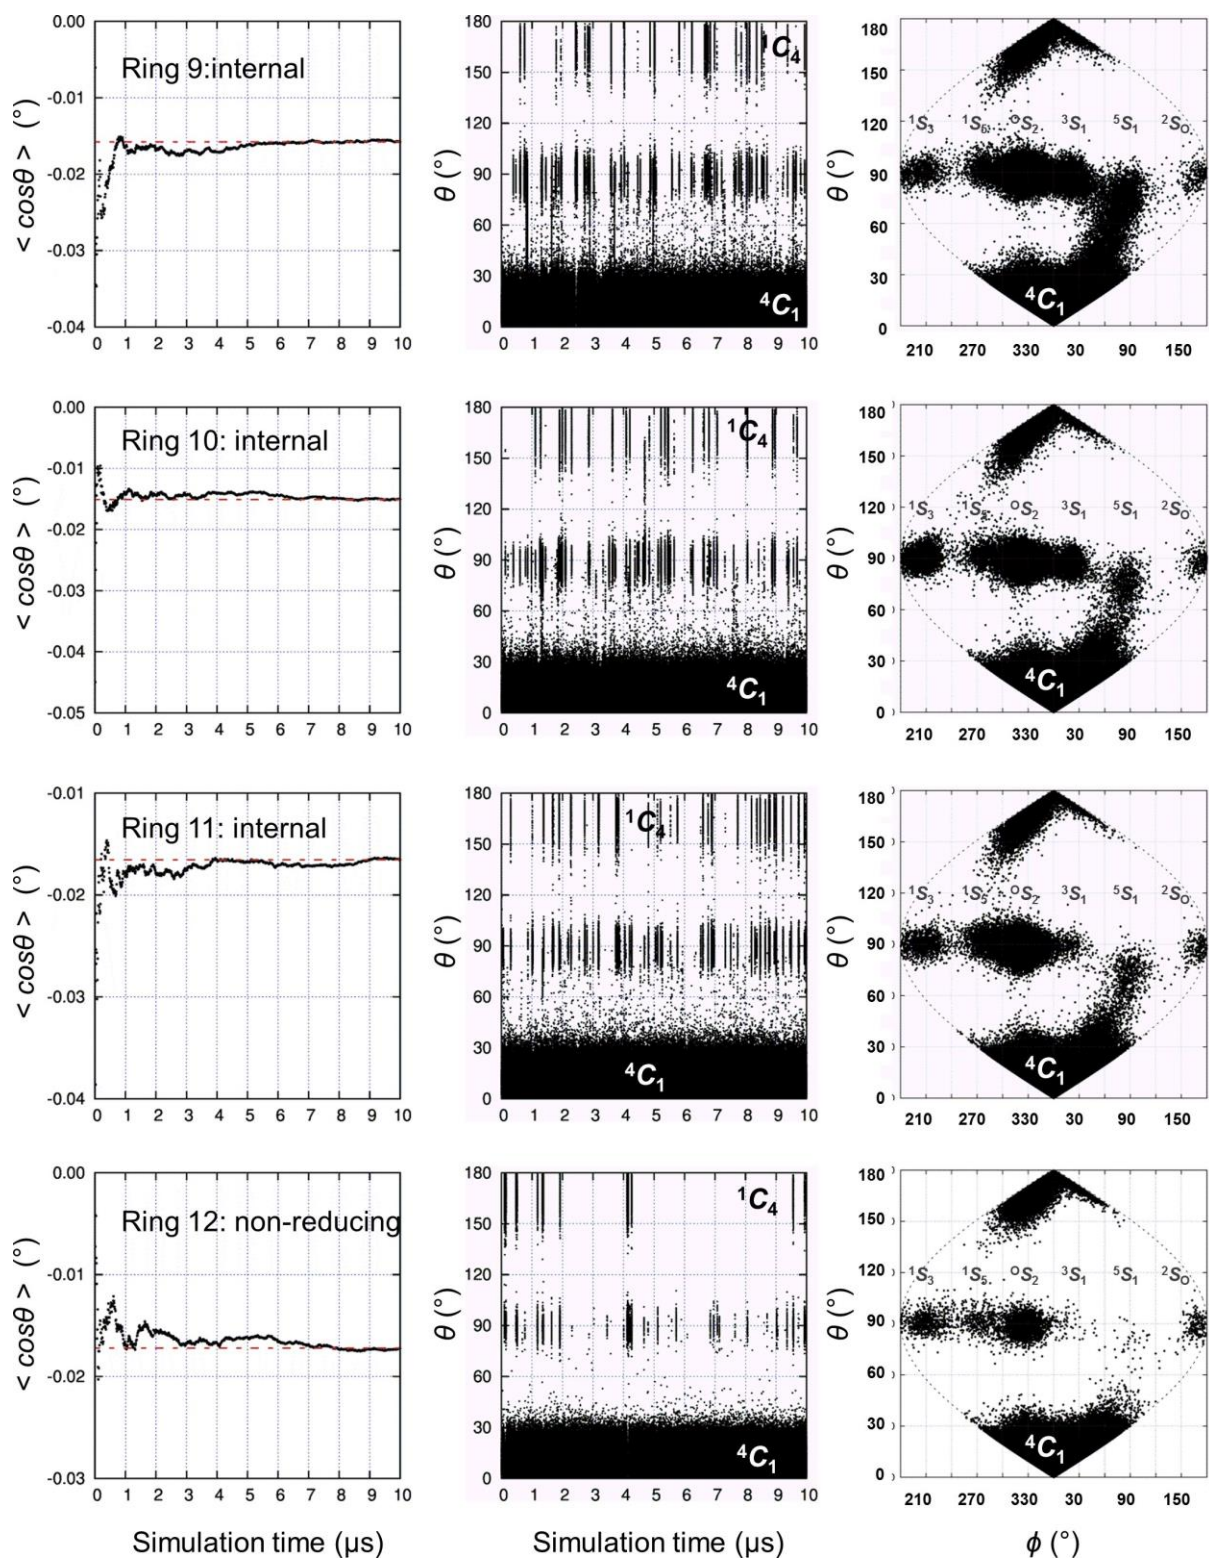

S14 continued

Figure S15. Puckering convergence, time series and sinusoidal projections: **2** (strand A)

Red line denotes simulation average; Glc pyranose rings are numbered from the reducing end

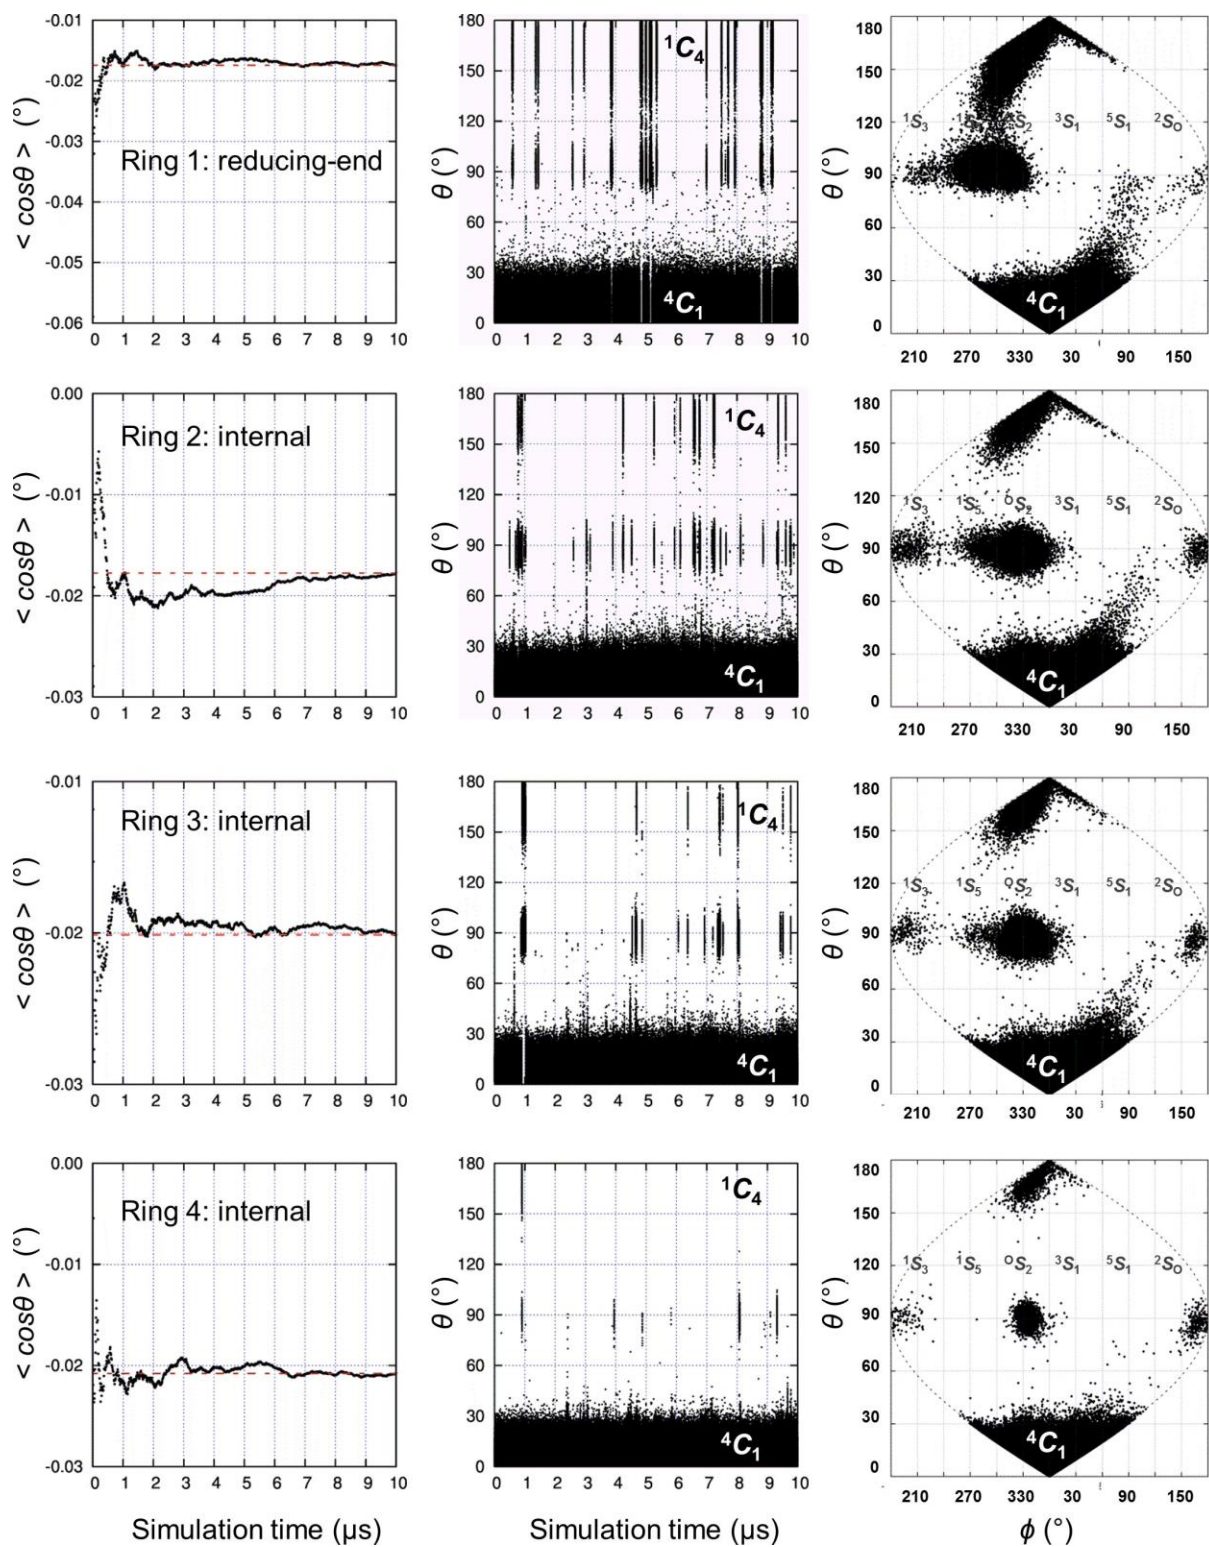

Figure S15. Puckering convergence, time series and sinusoidal projections: **2** (strand A)

Red line denotes simulation average; Glc pyranose rings are numbered from the reducing end

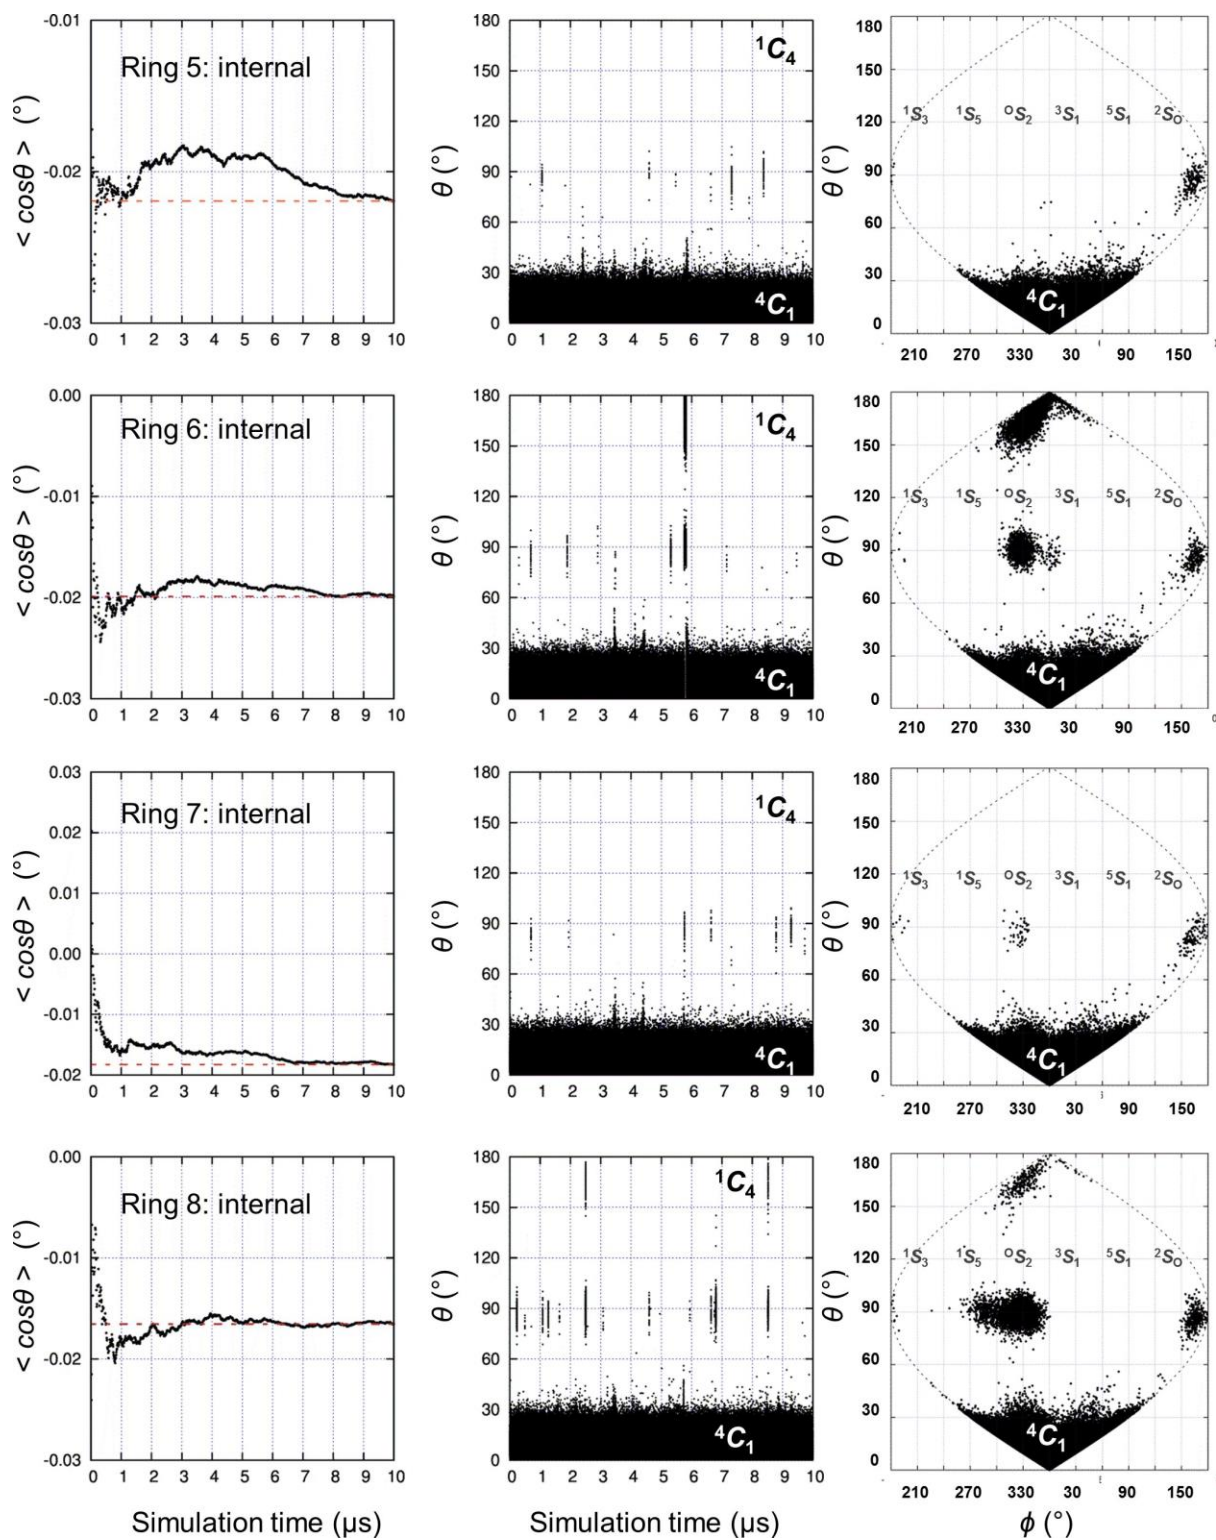

S15 continued

Figure S15. Puckering convergence, time series and sinusoidal projections: **2** (strand A)

Red line denotes simulation average; Glc pyranose rings are numbered from the reducing end

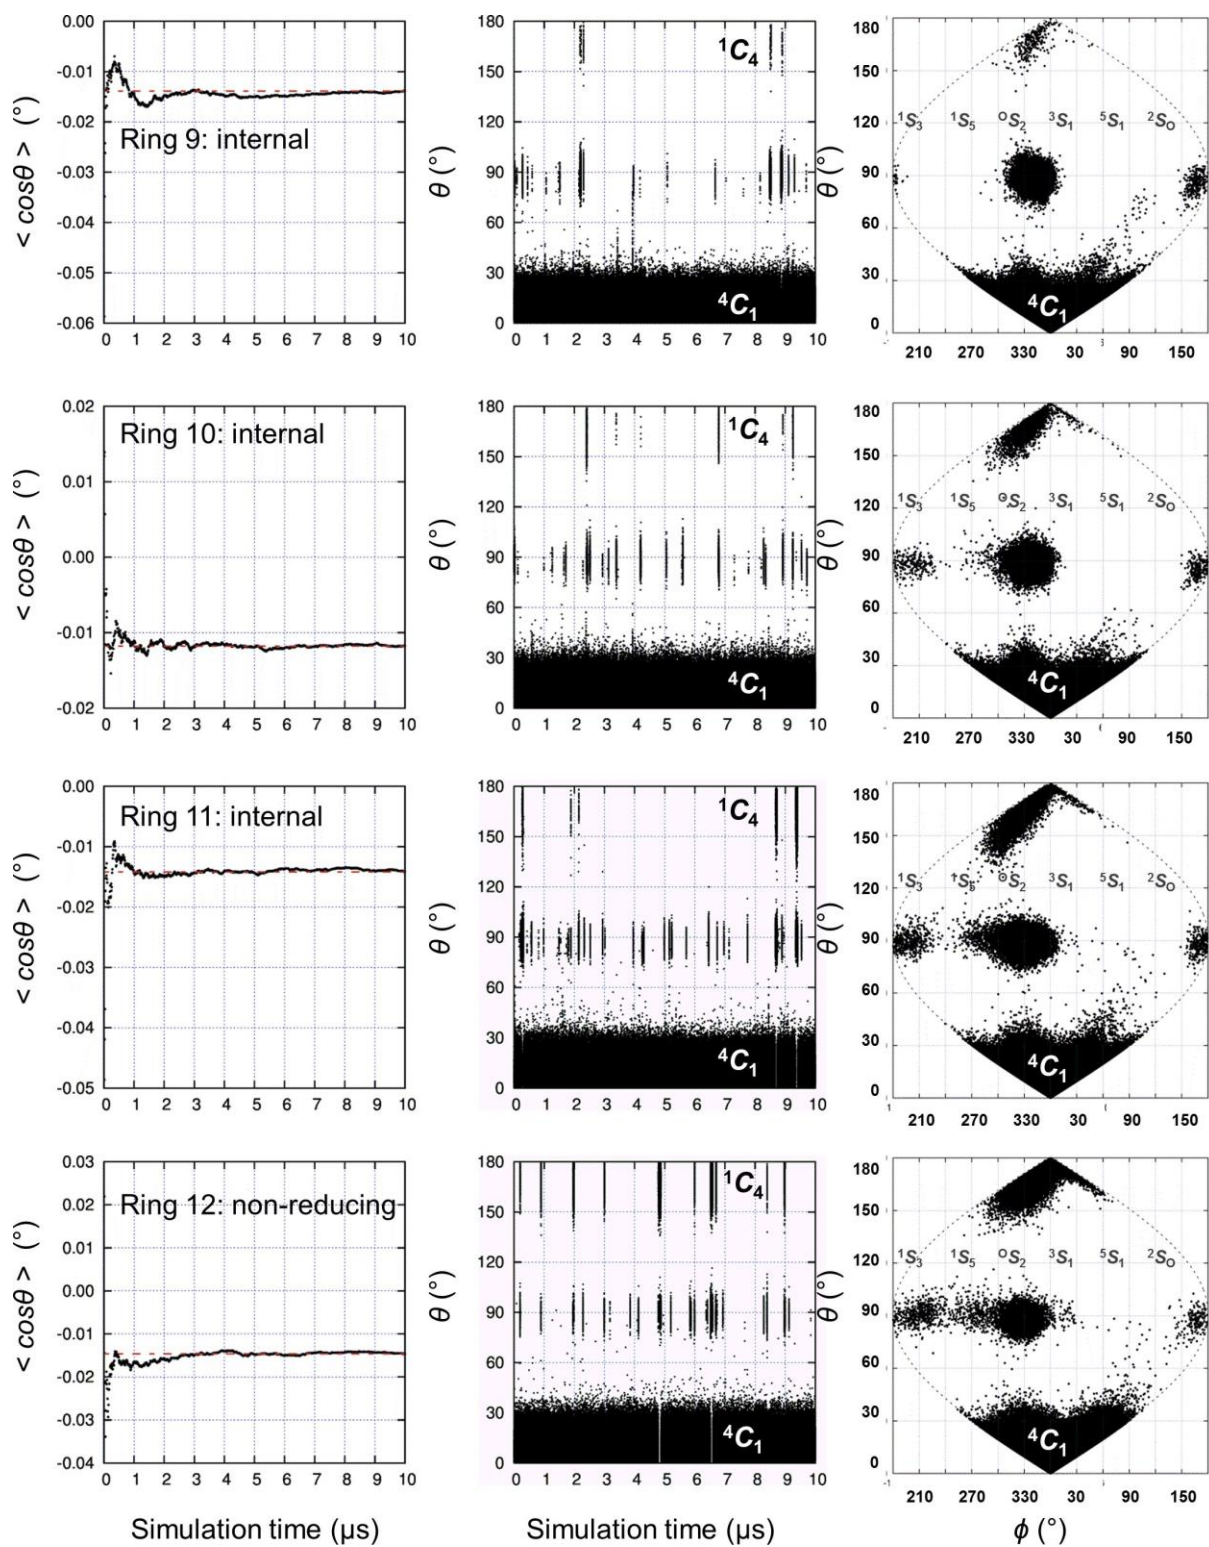

S15 continued

Figure S15. Puckering convergence, time series and sinusoidal projections: **2** (strand B)

Red line denotes simulation average; Glc pyranose rings are numbered from the reducing end

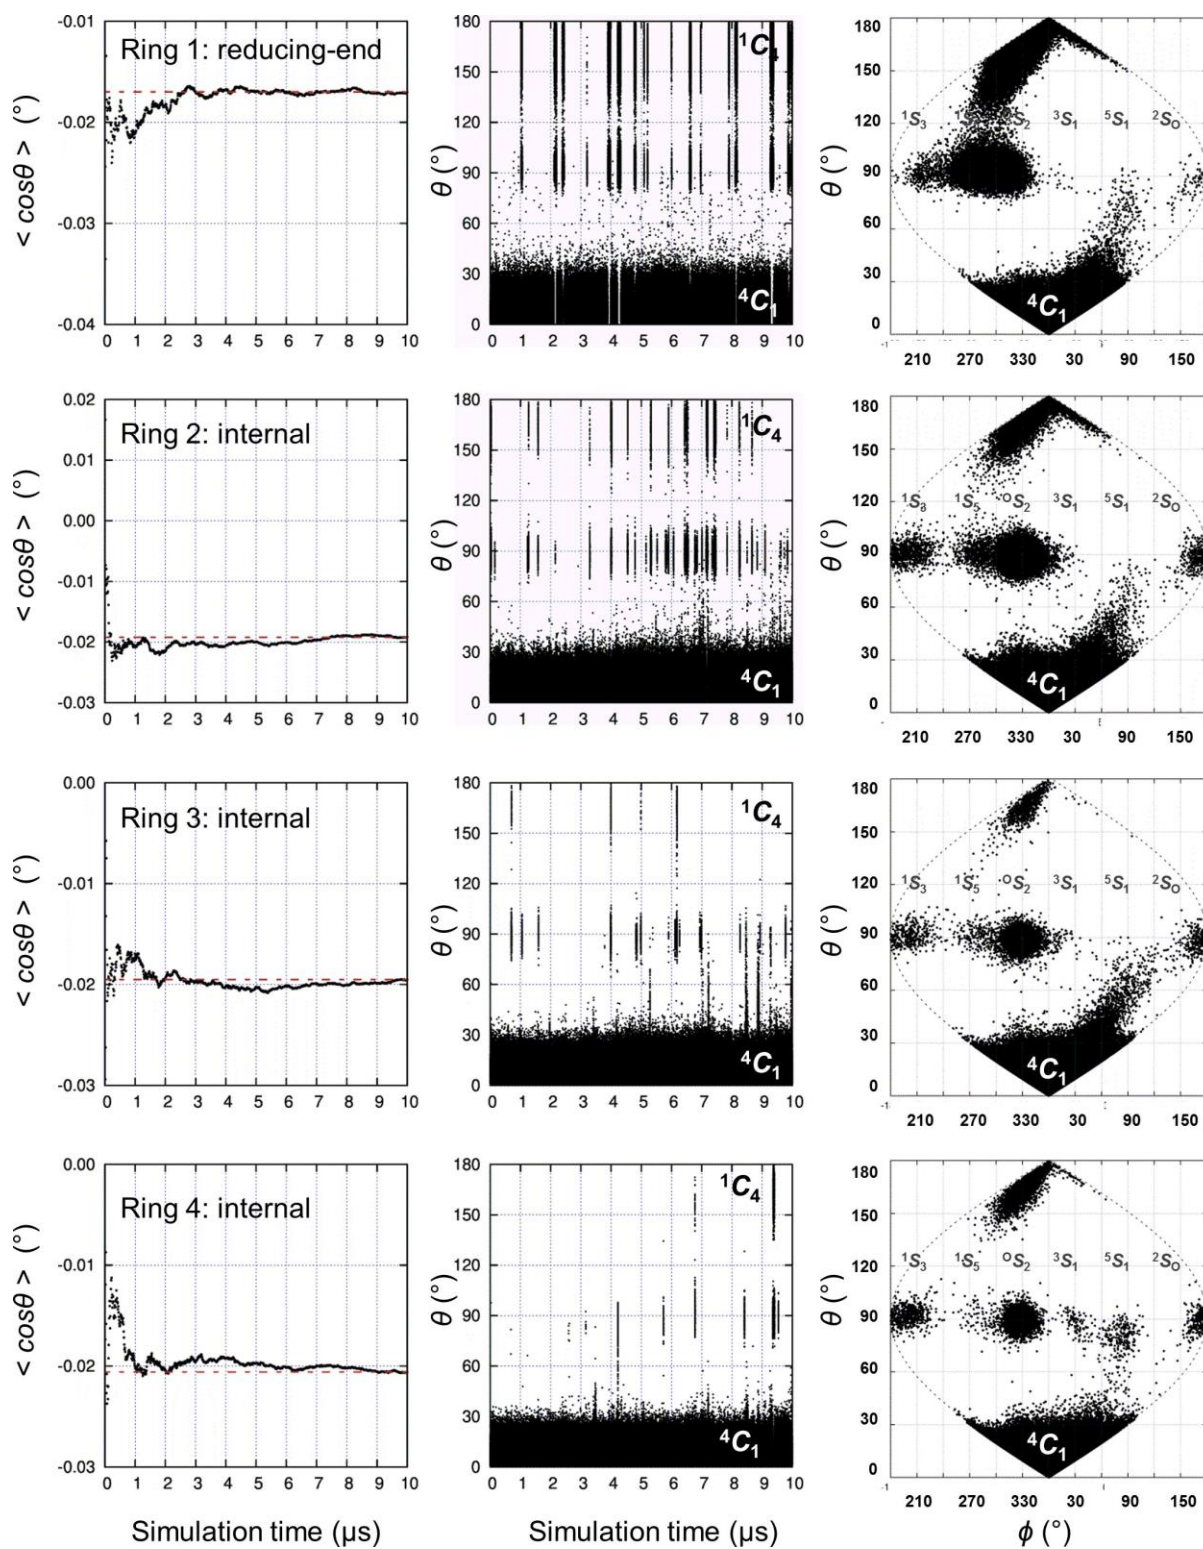



Figure S15. Puckering convergence, time series and sinusoidal projections: **2** (strand B)

Red line denotes simulation average; Glc pyranose rings are numbered from the reducing end

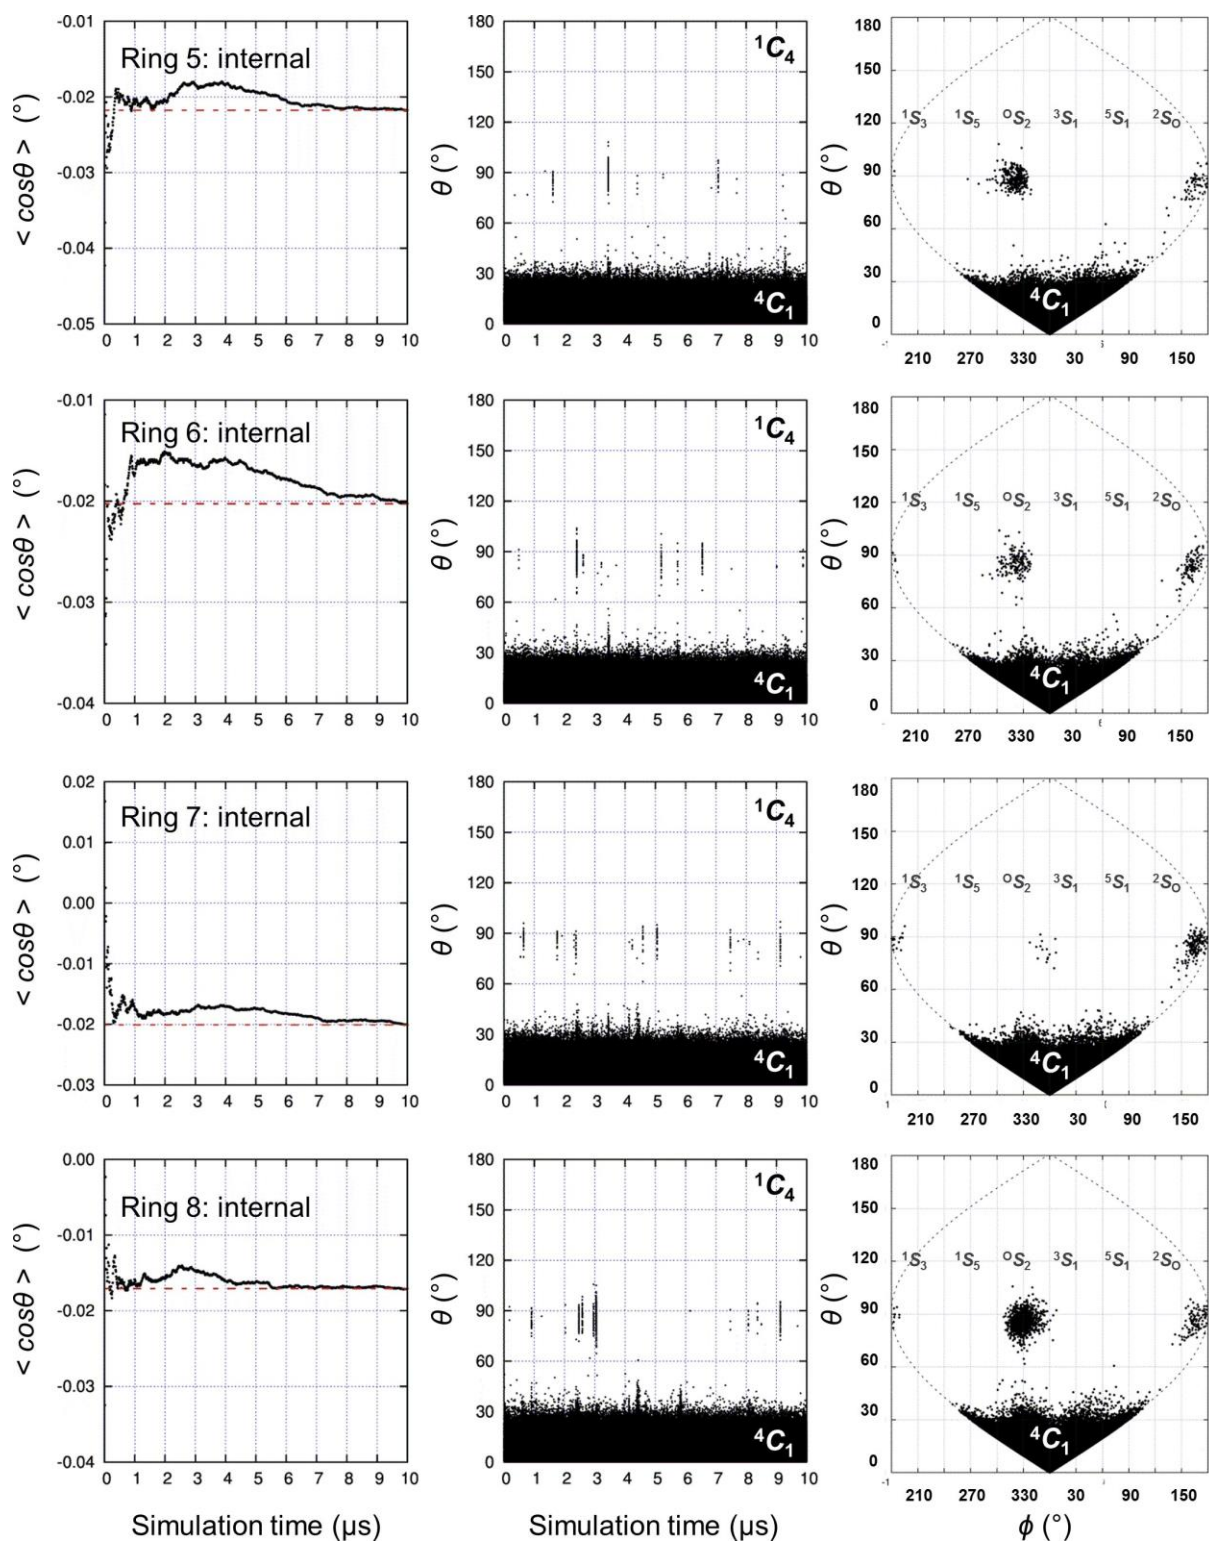

S15 continued

Figure S15. Puckering convergence, time series and sinusoidal projections: **2** (strand B)

Red line denotes simulation average; Glc pyranose rings are numbered from the reducing end

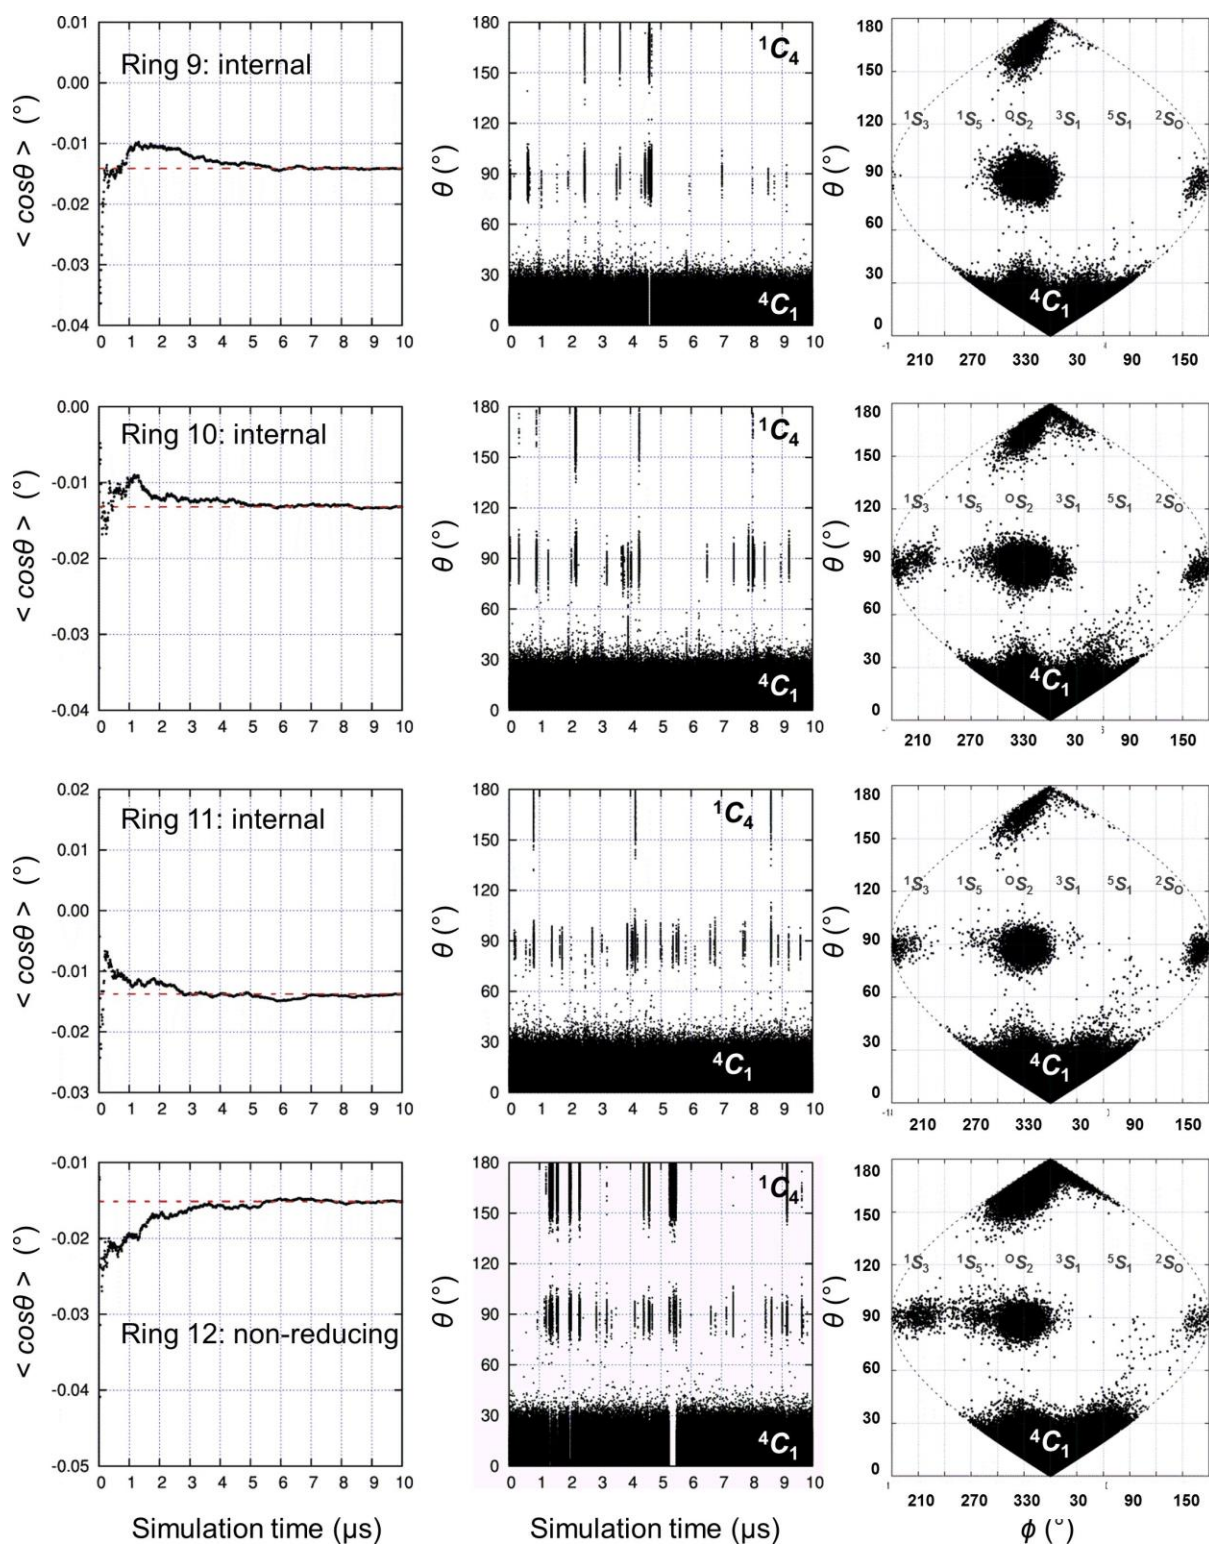

S15 continued

Figure S16. Puckering convergence, time series and sinusoidal projections: **3** (strand A)

Red line denotes simulation average; Glc pyranose rings are numbered from the reducing end

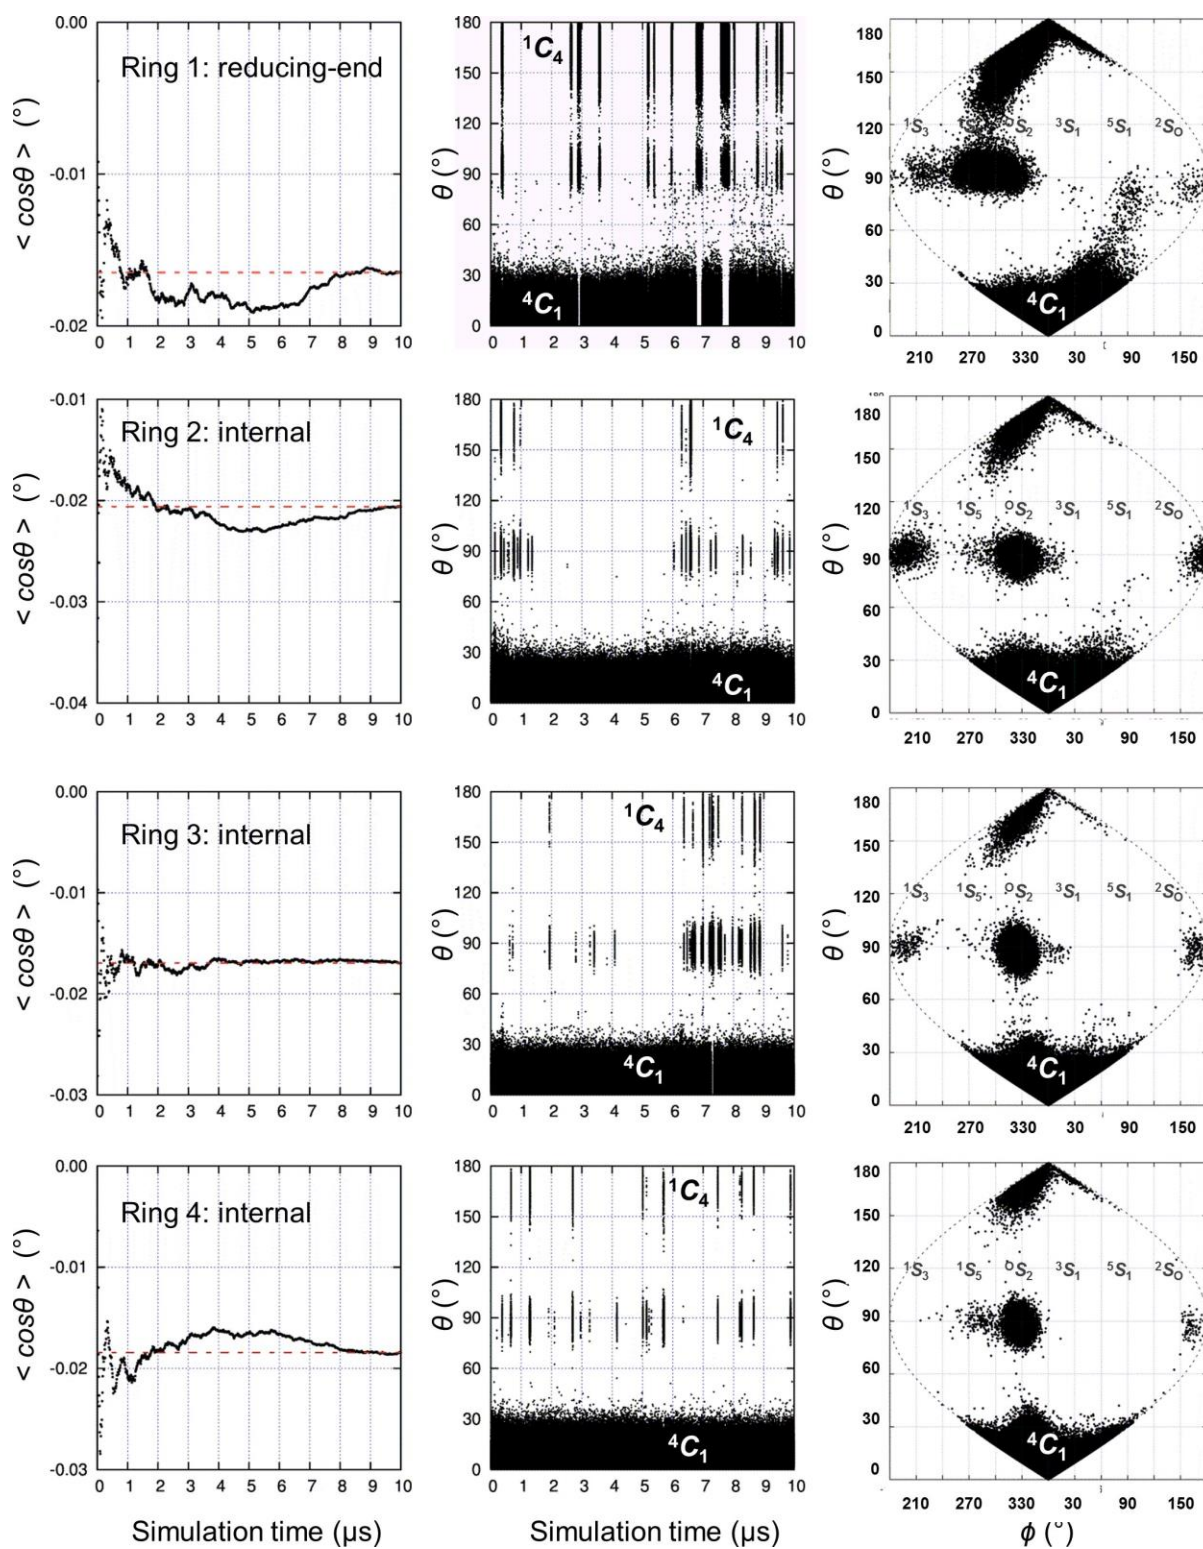

Figure S16. Puckering convergence, time series and sinusoidal projections: **3** (strand A)

Red line denotes simulation average; Glc pyranose rings are numbered from the reducing end

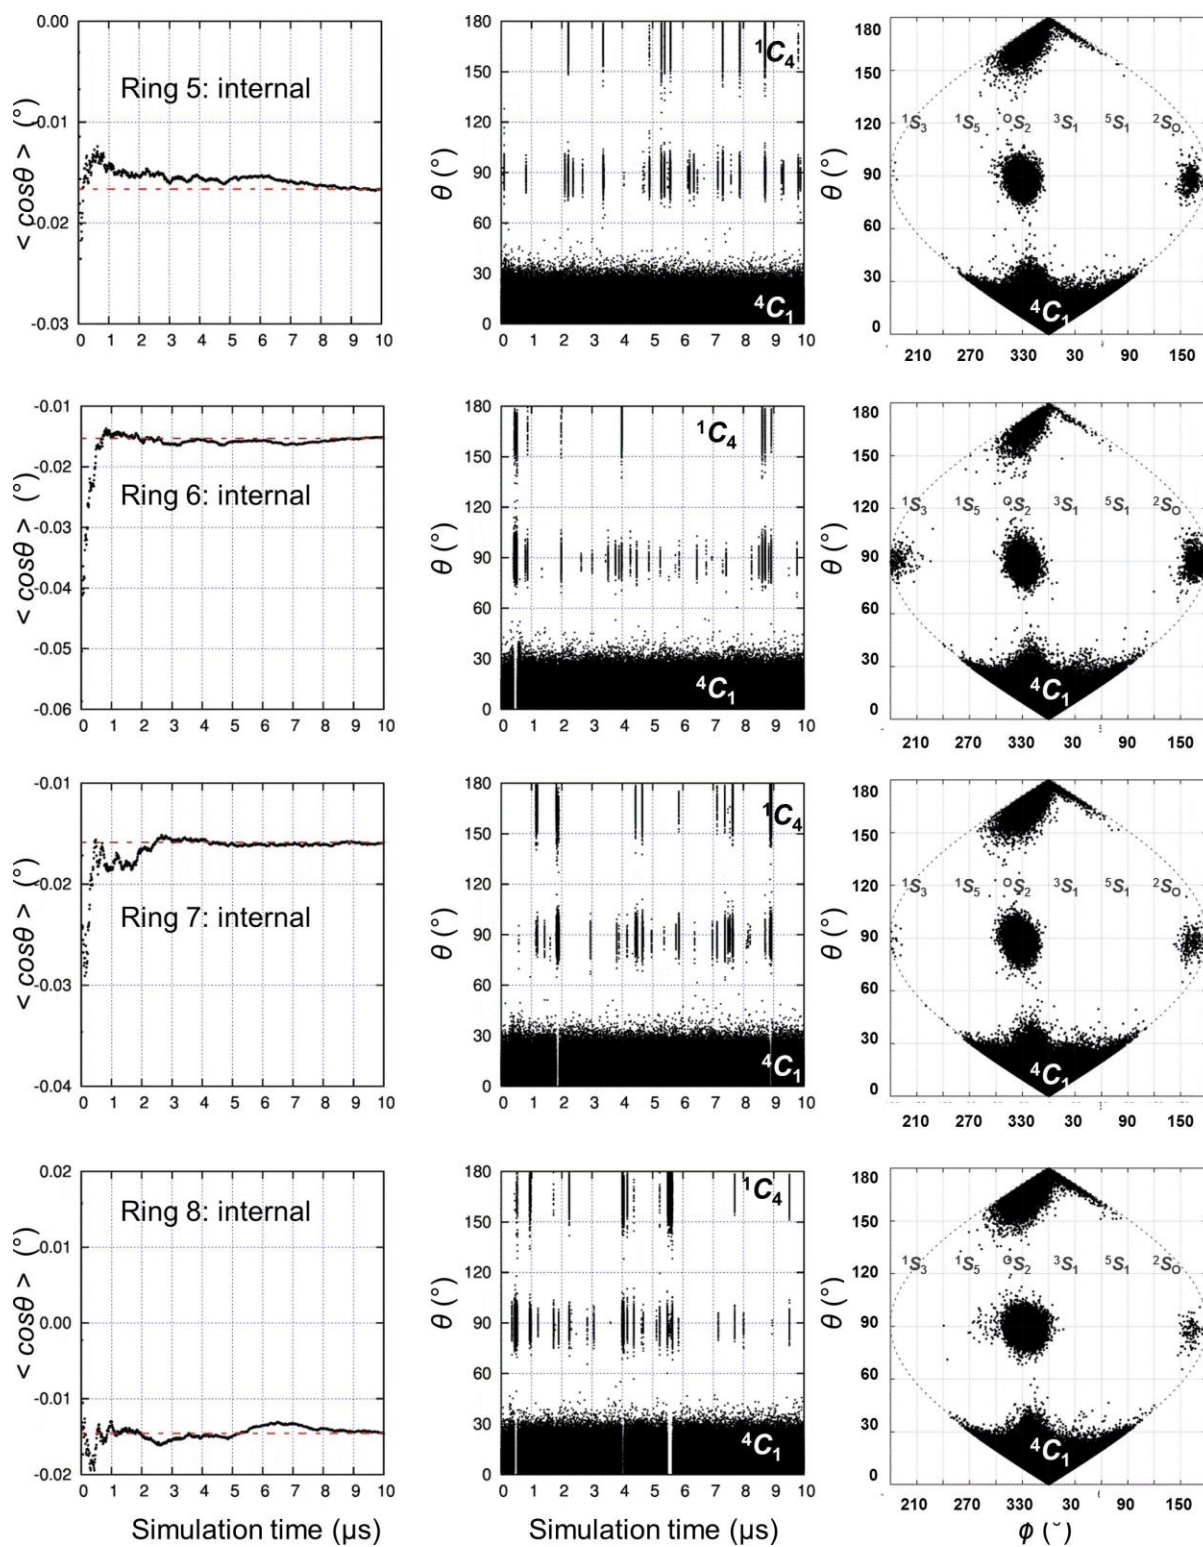

S16 continued

Figure S16. Puckering convergence, time series and sinusoidal projections: **3** (strand A)

Red line denotes simulation average; Glc pyranose rings are numbered from the reducing end

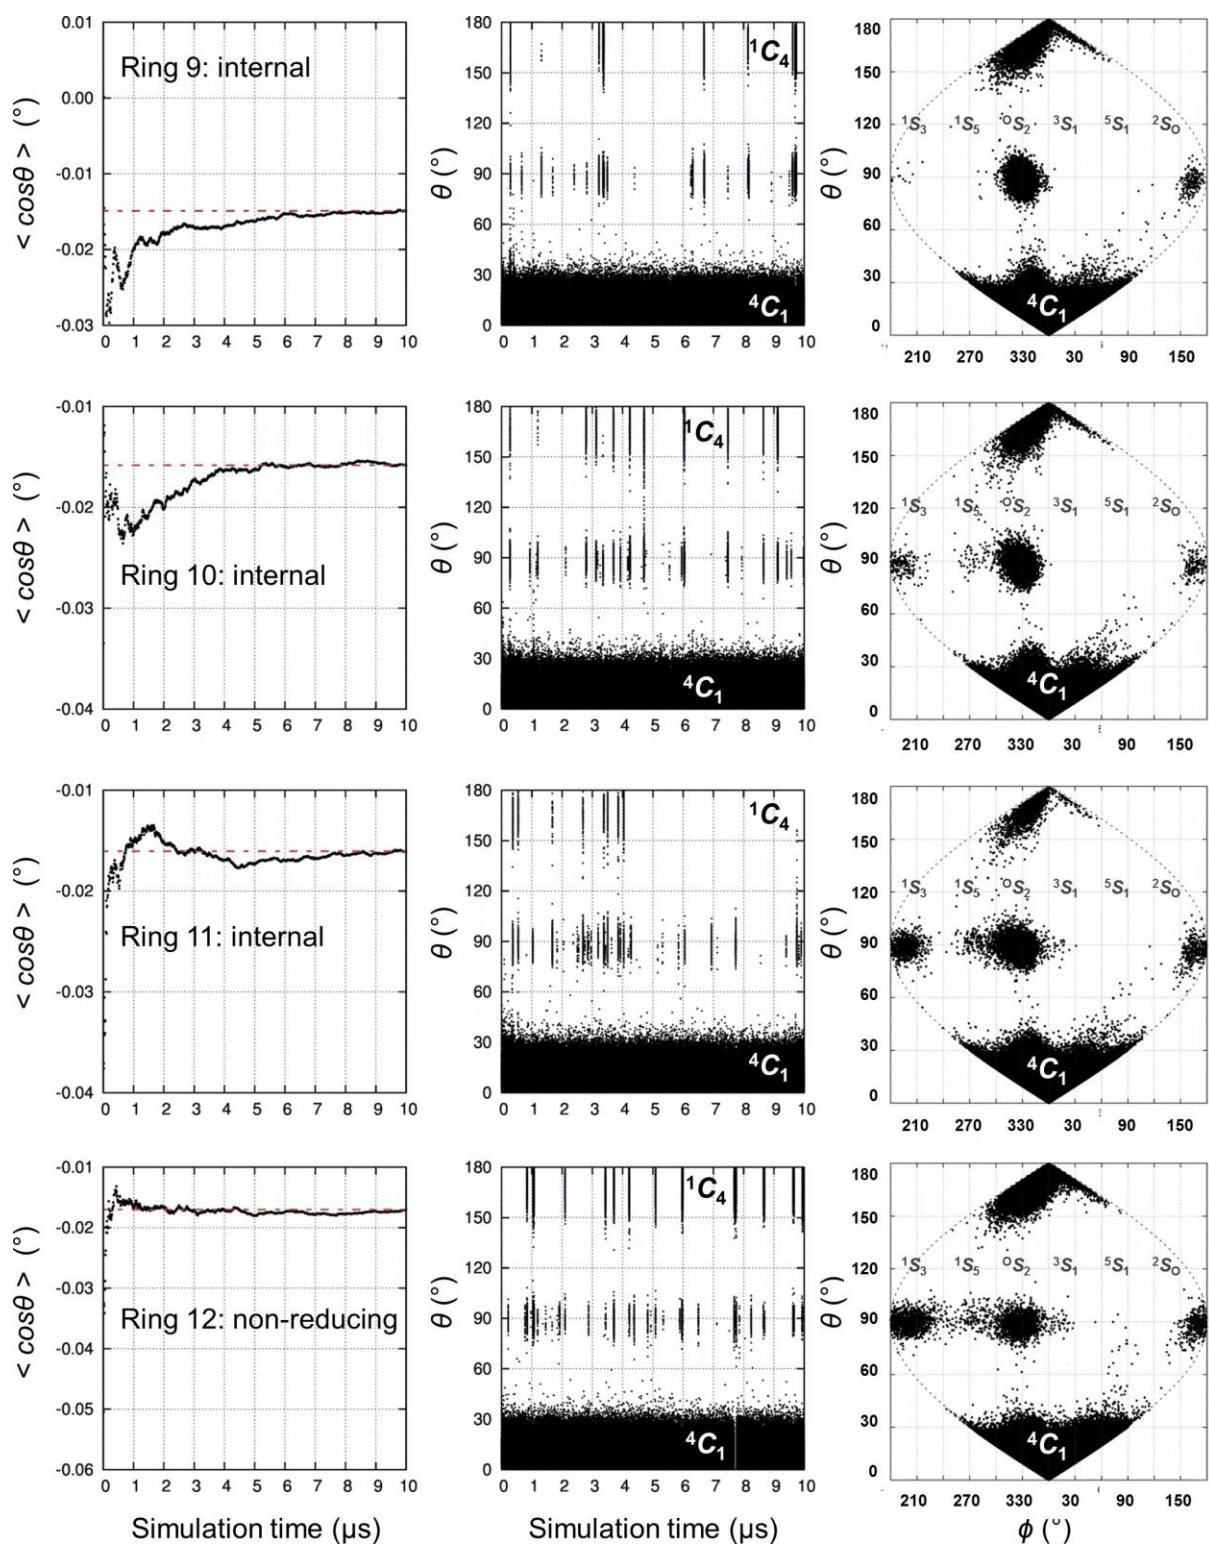

S16 continued

Figure S16. Puckering convergence, time series and sinusoidal projections: **3** (strand B)

Red line denotes simulation average; Glc pyranose rings are numbered from the reducing end

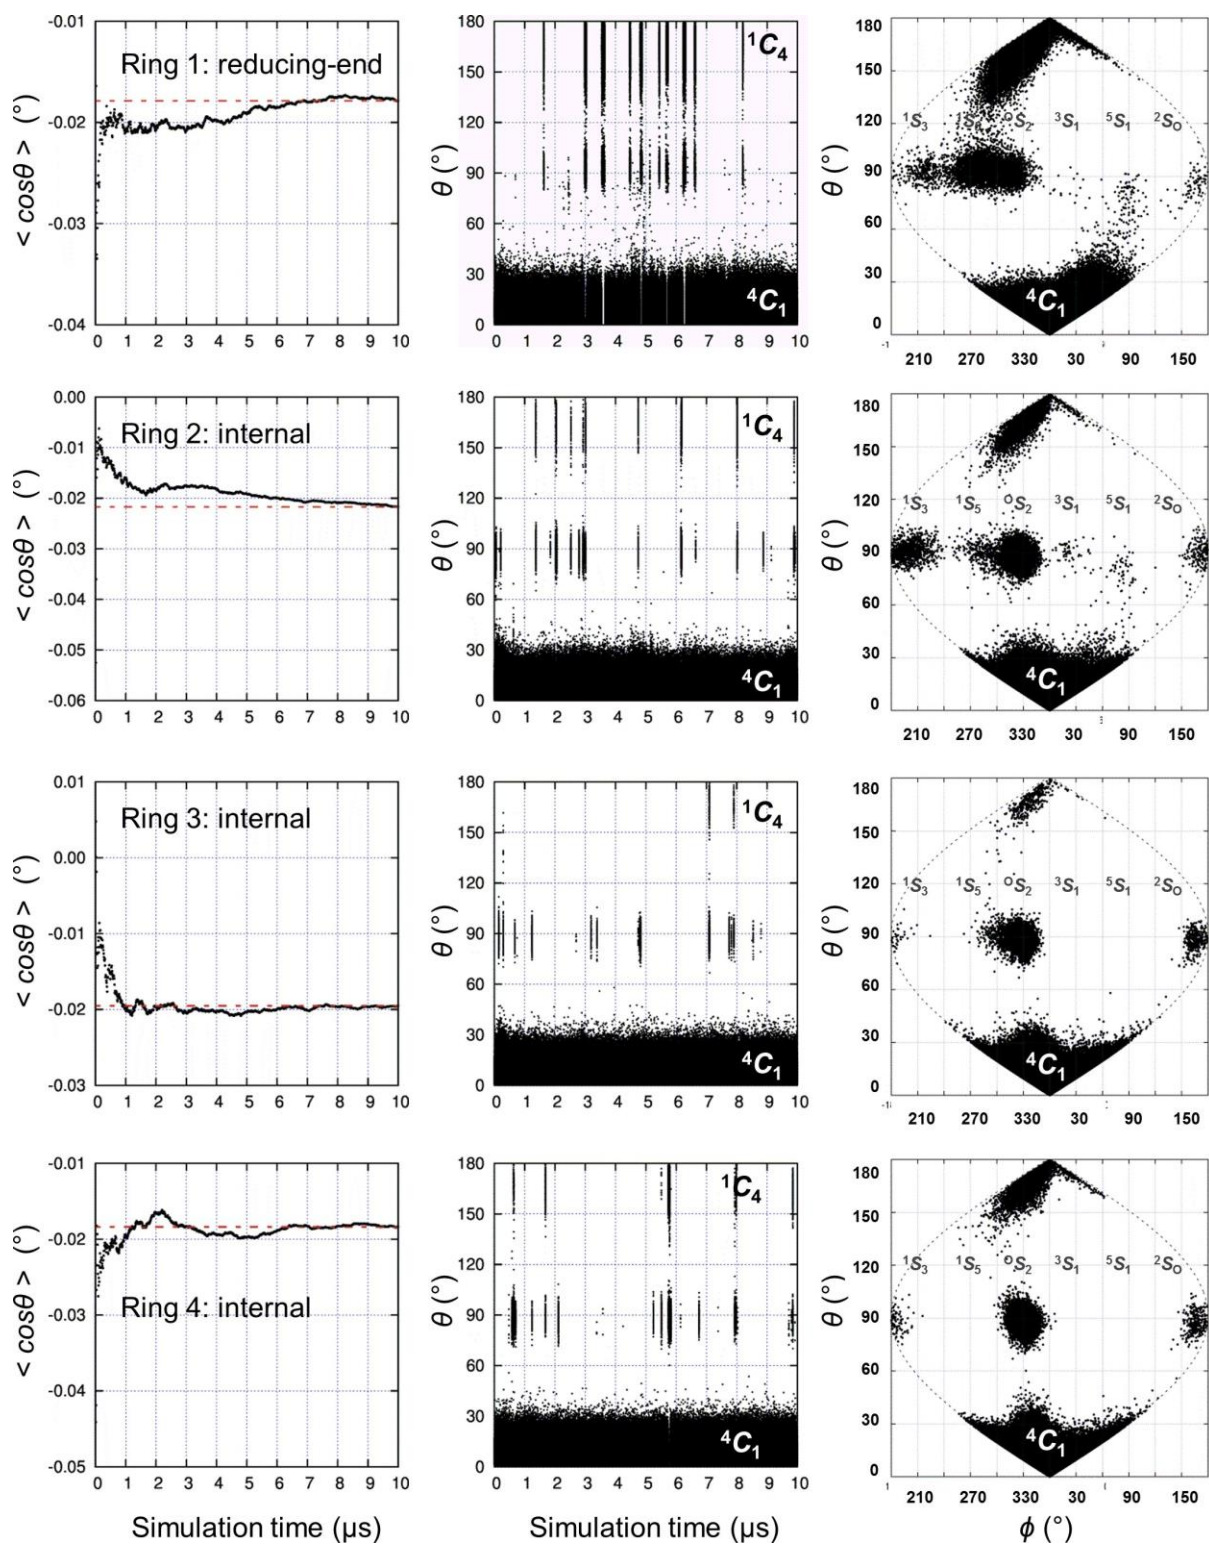

Figure S16. Puckering convergence, time series and sinusoidal projections: **3** (strand B)

Red line denotes simulation average; Glc pyranose rings are numbered from the reducing end

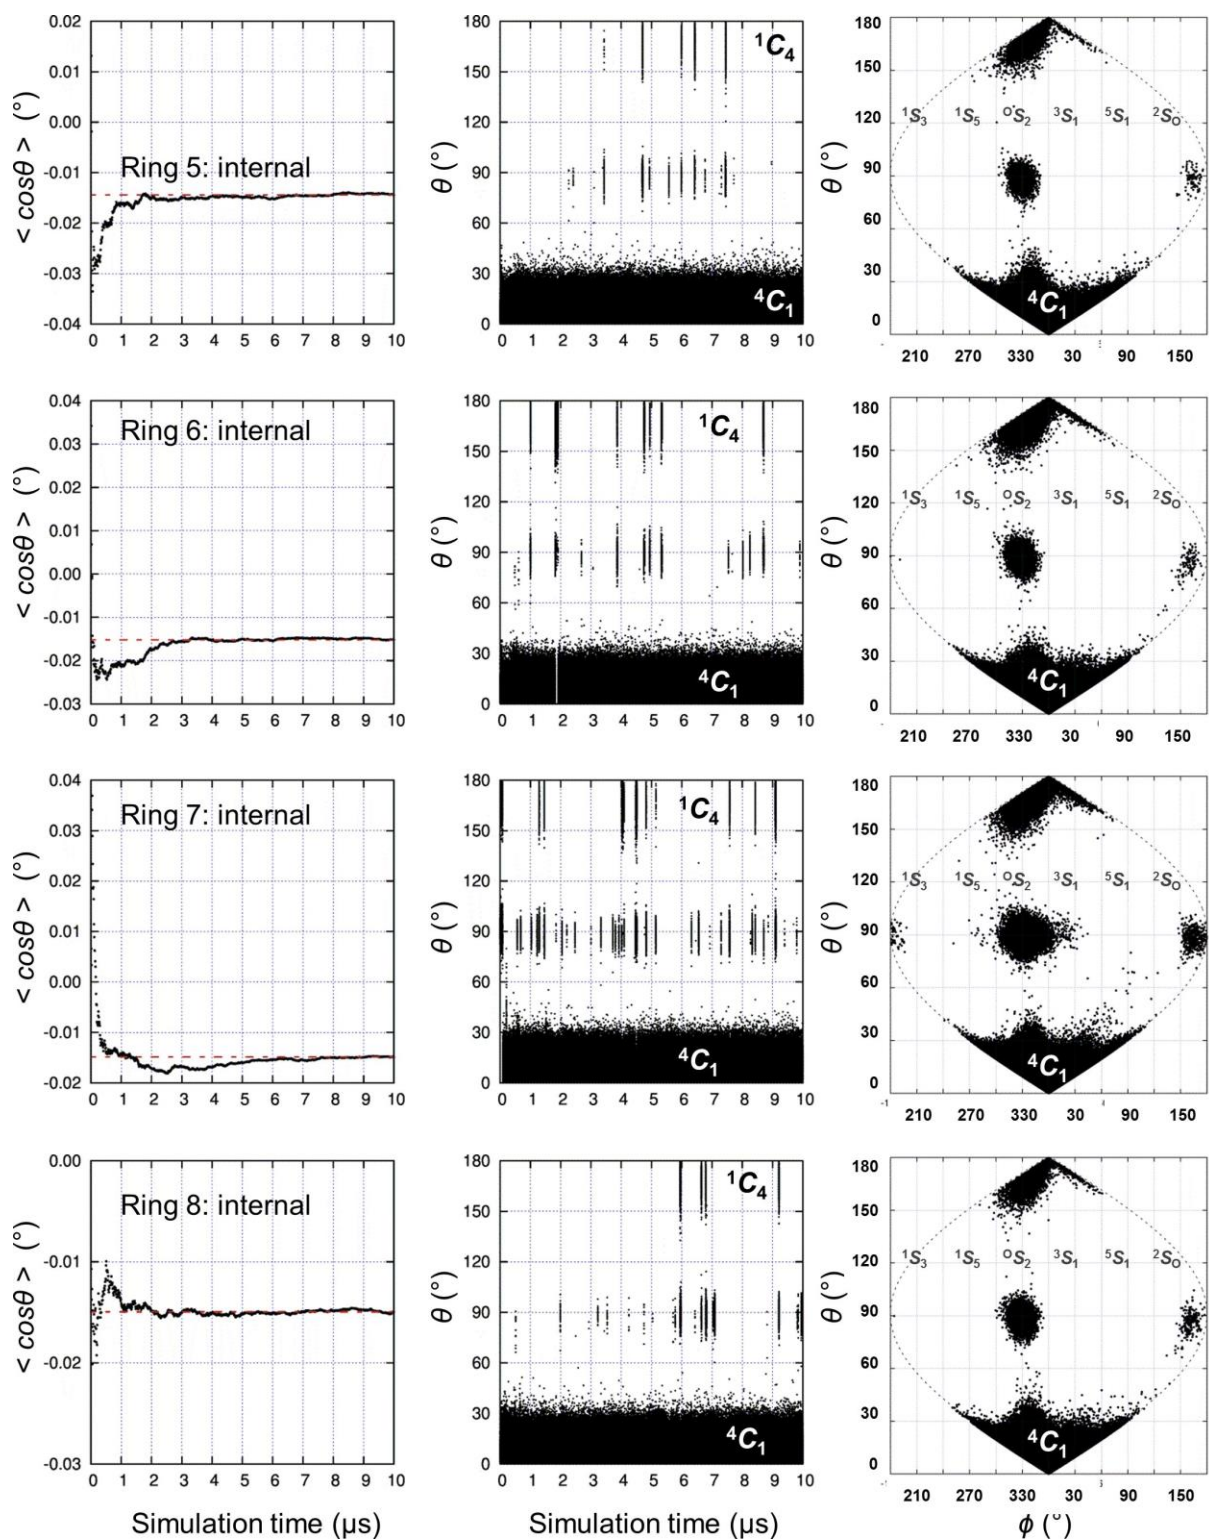

Figure S16. Puckering convergence, time series and sinusoidal projections: **3** (strand B)

Red line denotes simulation average; Glc pyranose rings are numbered from the reducing end

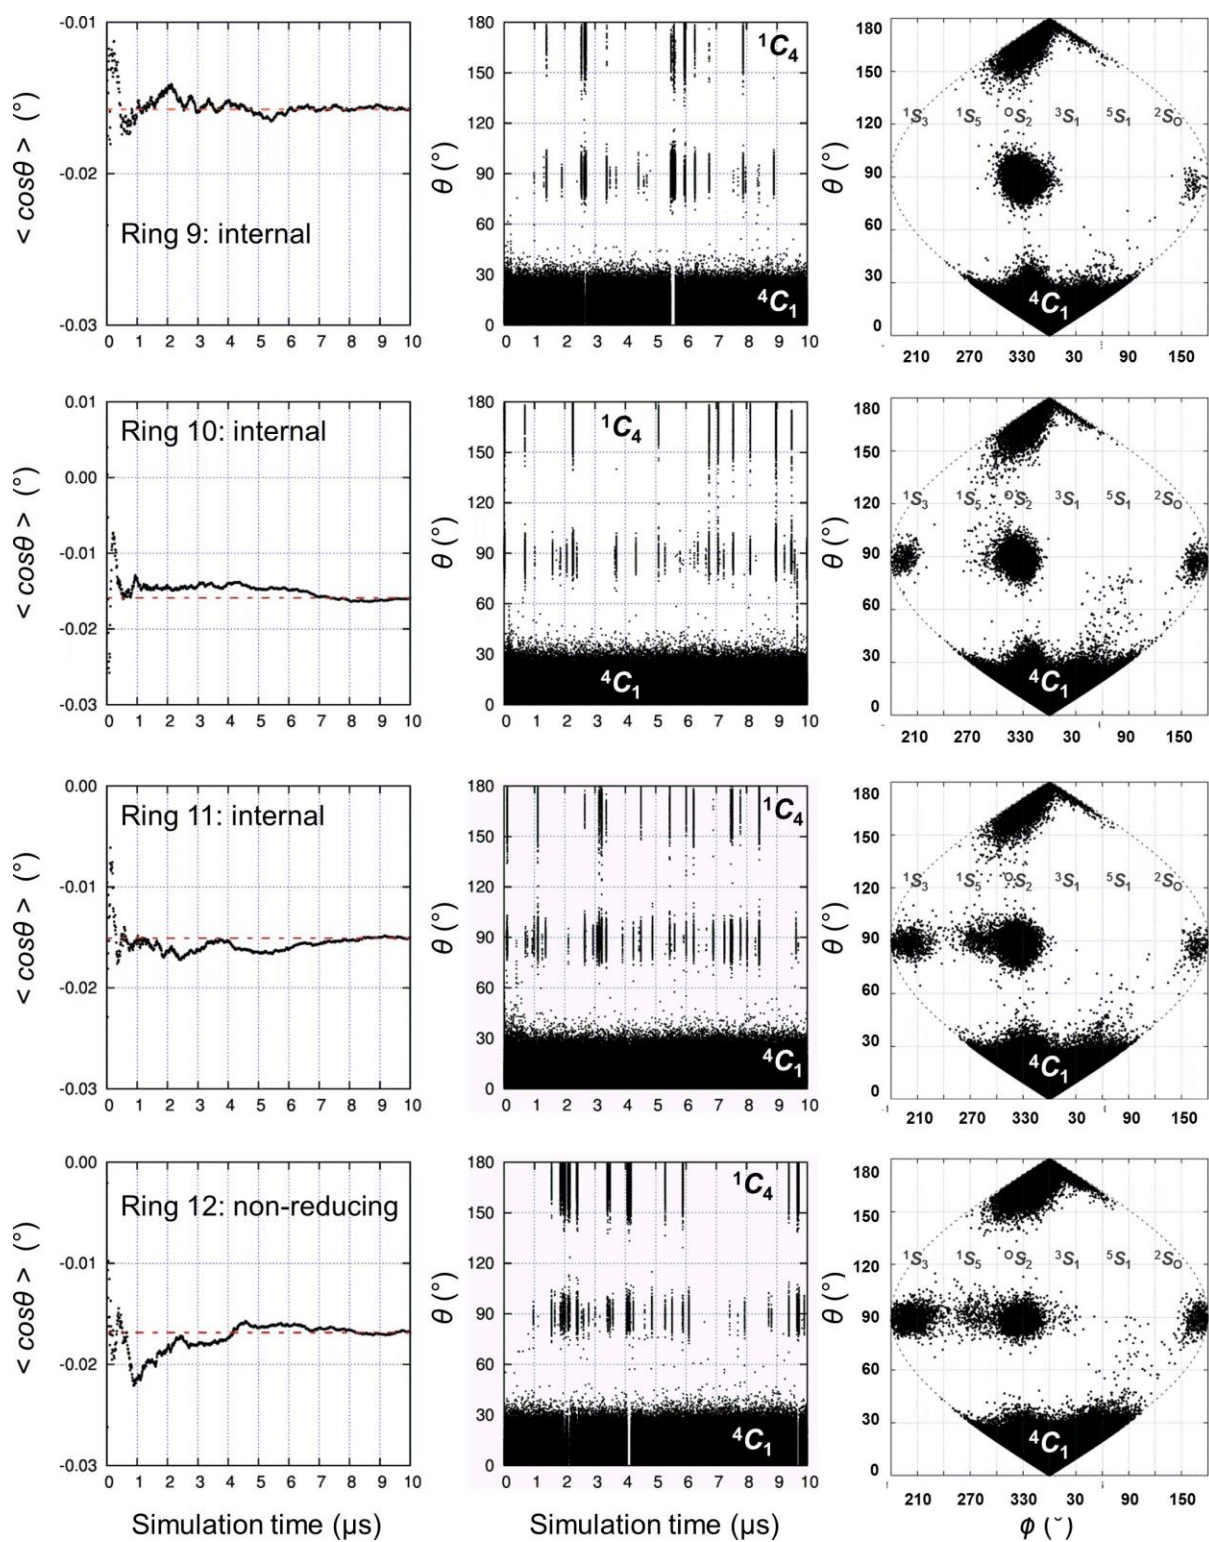

S16 continued



Figure S17. Puckering convergence, time series and sinusoidal projections: **4** (hexasaccharide)

Red line denotes simulation average; Glc pyranose rings are numbered from the reducing end

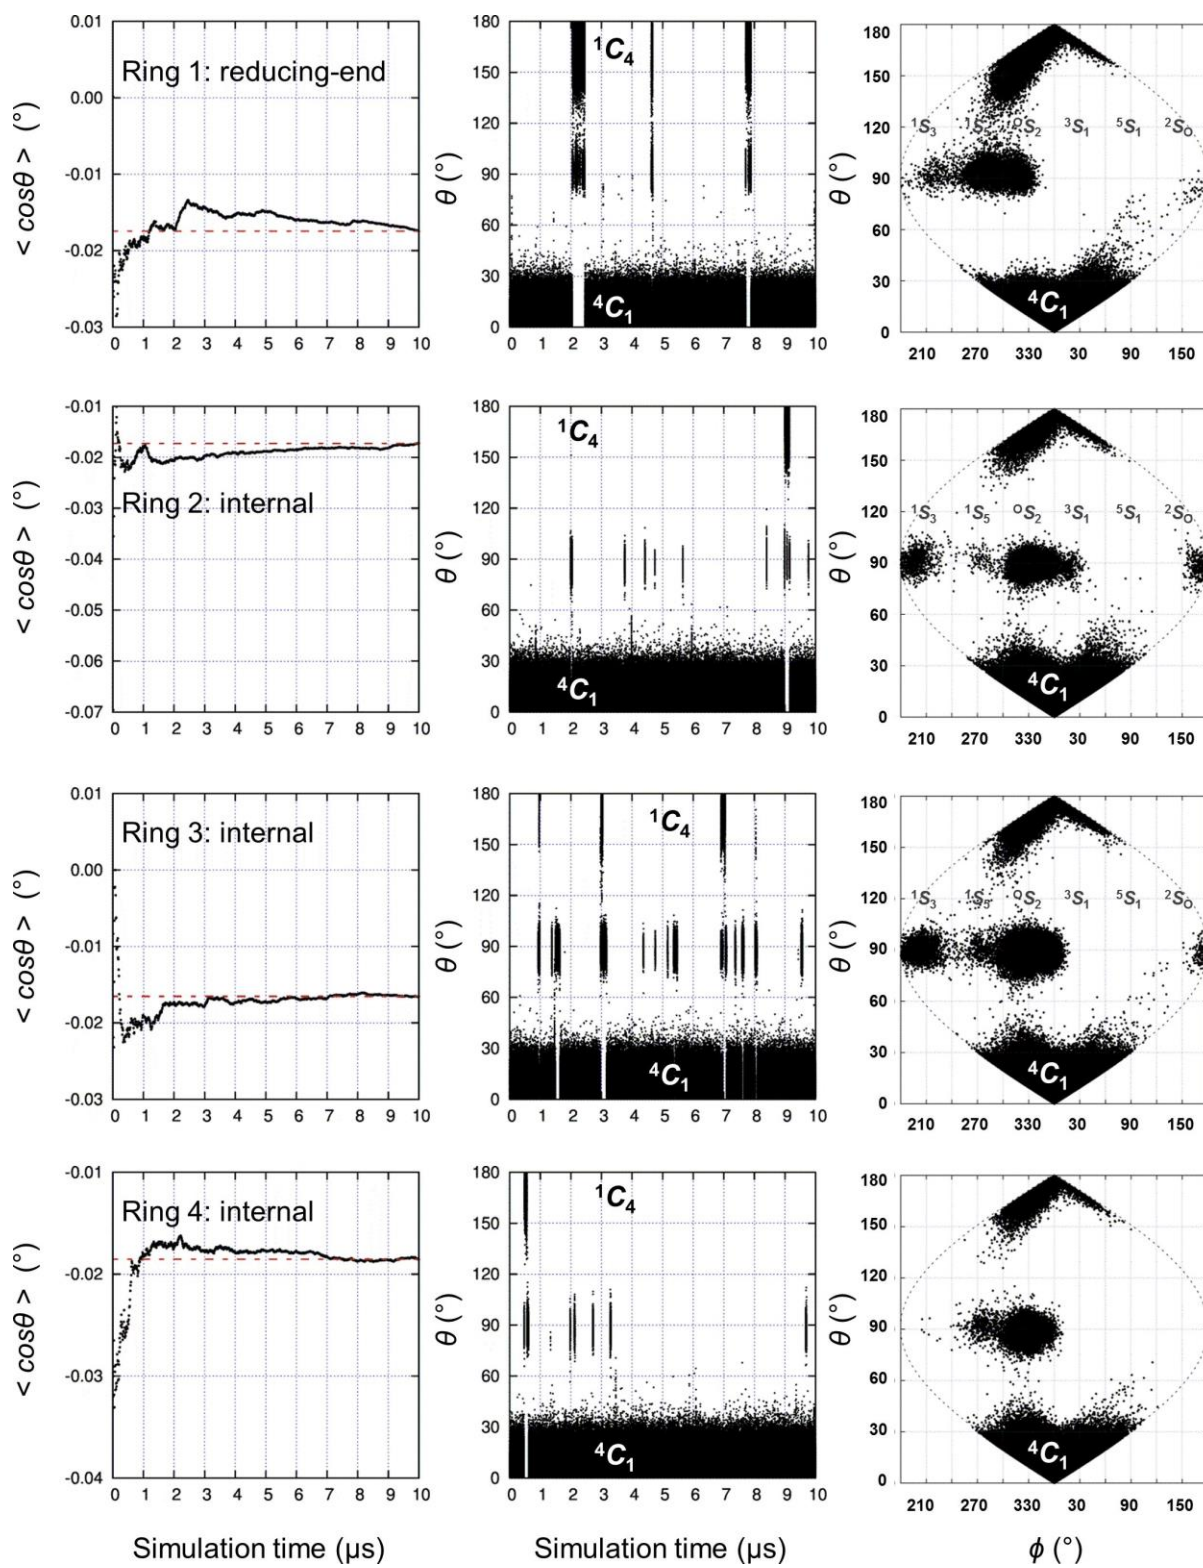

Figure S17. Puckering convergence, time series and sinusoidal projections: **4** (hexasaccharide)

Red line denotes simulation average; Glc pyranose rings are numbered from the reducing end

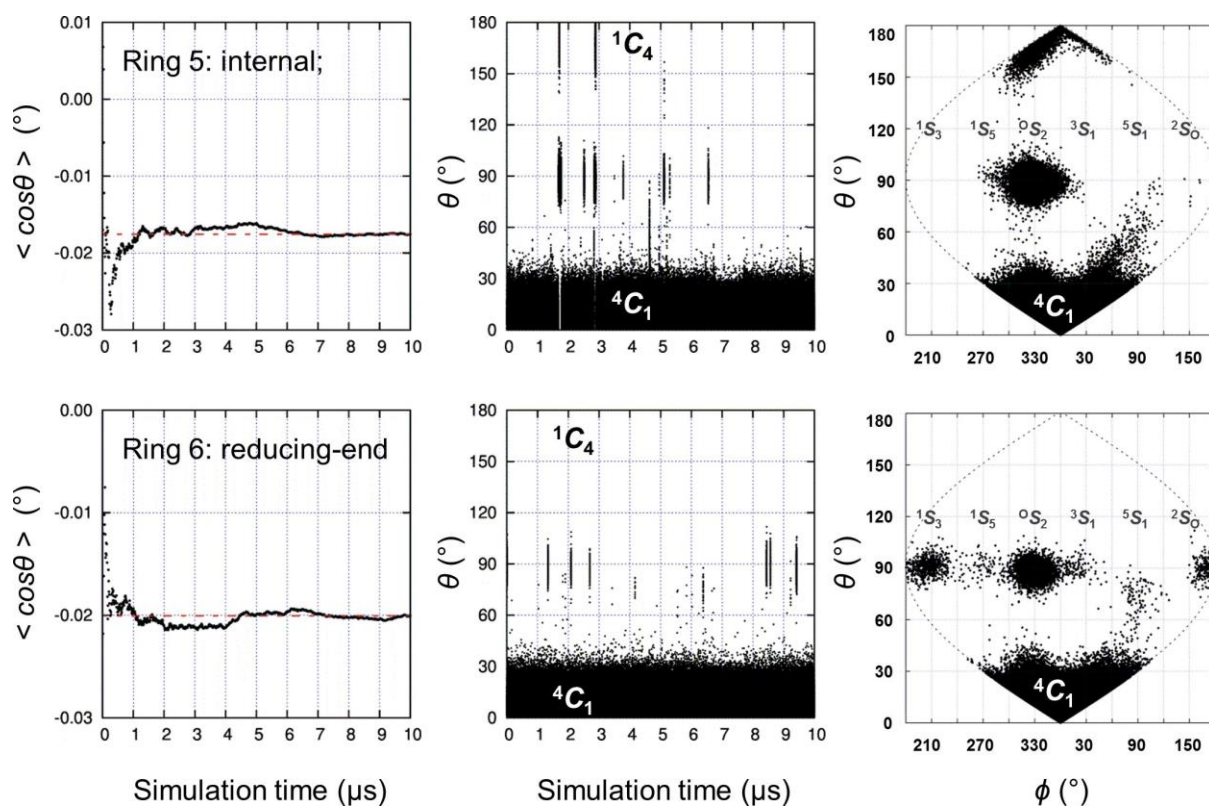

Figure S18. Puckering convergence, time series and sinusoidal projections: **5** and **6**

Red line denotes simulation average; Glc pyranose rings are numbered from the reducing end

(5) - trisaccharide

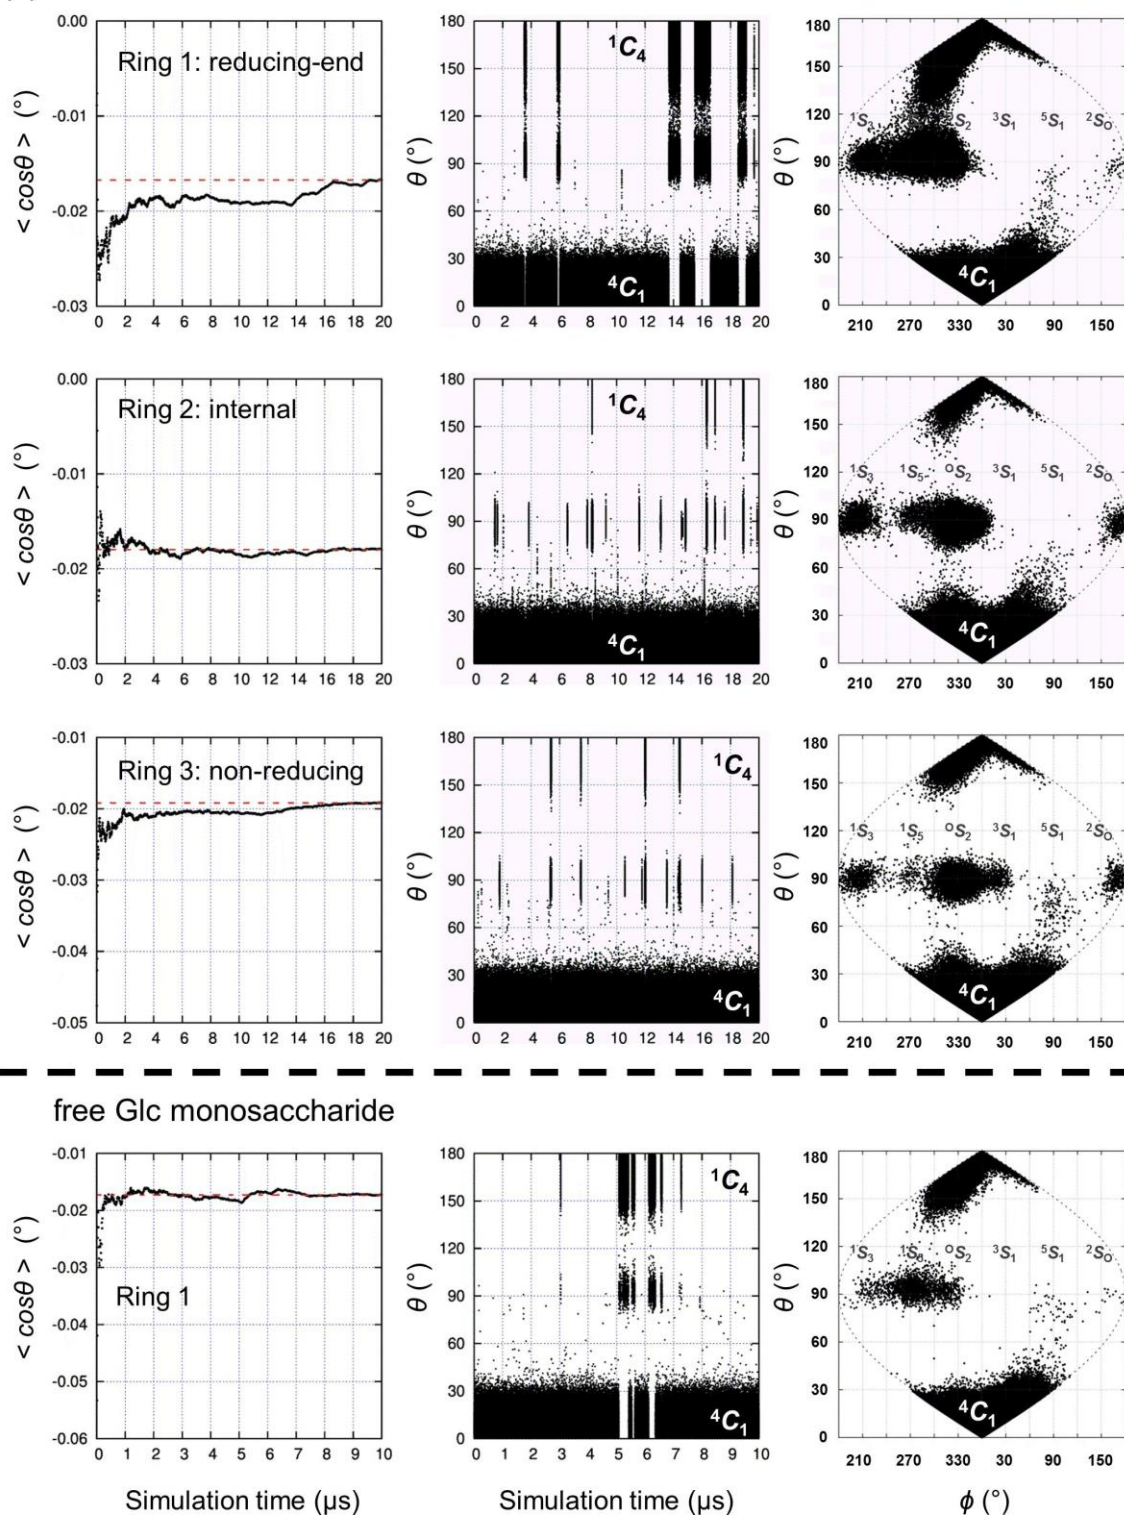

Table S19. Pyranose pucker populations (%) and relative free energies ( $\Delta G$ , kcal mol<sup>-1</sup>) from a 10  $\mu$ s simulation of **1** (numbered from reducing end)

| Glc:1  |       |            | Glc:2  |       |            | Glc:3  |       |            | Glc:4  |       |            | Glc:5  |       |            | Glc:6  |       |            |
|--------|-------|------------|--------|-------|------------|--------|-------|------------|--------|-------|------------|--------|-------|------------|--------|-------|------------|
| Pucker | %     | $\Delta G$ |
| 4C1    | 92.03 | 0.05       | 4C1    | 95.09 | 0.03       | 4C1    | 93.24 | 0.04       | 4C1    | 88.64 | 0.07       | 4C1    | 86.04 | 0.09       | 4C1    | 90.88 | 0.06       |
| 1C4    | 5.47  | 1.72       | OS2    | 2.39  | 2.21       | OS2    | 3.22  | 2.04       | OS2    | 5.46  | 1.72       | OS2    | 5.08  | 1.77       | 3OB    | 2.89  | 2.10       |
| 1S5    | 0.99  | 2.74       | 1C4    | 1.20  | 2.62       | 1C4    | 1.45  | 2.51       | 1C4    | 2.47  | 2.20       | 3OB    | 4.30  | 1.87       | OS2    | 2.74  | 2.13       |
| B25    | 0.82  | 2.85       | B25    | 0.60  | 3.04       | B25    | 0.66  | 2.98       | 3OB    | 1.72  | 2.41       | 1C4    | 2.51  | 2.18       | 1C4    | 1.70  | 2.41       |
| OS2    | 0.29  | 3.47       | 3OB    | 0.18  | 3.76       | 3OB    | 0.52  | 3.11       | B25    | 0.71  | 2.93       | 3S1    | 0.58  | 3.05       | 3S1    | 0.51  | 3.13       |
| 5H4    | 0.12  | 4.01       | 1S5    | 0.11  | 4.03       | 2H1    | 0.18  | 3.76       | 3S1    | 0.18  | 3.75       | B25    | 0.54  | 3.09       | 2H1    | 0.30  | 3.44       |
| 14B    | 0.07  | 4.33       | 1S3    | 0.09  | 4.14       | 3S1    | 0.16  | 3.83       | 2H1    | 0.16  | 3.80       | 2H1    | 0.26  | 3.52       | B25    | 0.30  | 3.44       |
| 2H1    | 0.04  | 4.61       | 2H1    | 0.08  | 4.26       | 1S5    | 0.11  | 4.03       | 1S5    | 0.12  | 3.98       | E1     | 0.20  | 3.70       | E1     | 0.23  | 3.60       |
| 5E     | 0.04  | 4.68       | B30    | 0.05  | 4.55       | E1     | 0.09  | 4.15       | 1S3    | 0.10  | 4.08       | 1S3    | 0.07  | 4.31       | 2E     | 0.10  | 4.11       |
| E4     | 0.04  | 4.71       | 3S1    | 0.04  | 4.63       | 1S3    | 0.07  | 4.34       | E1     | 0.10  | 4.11       | 2E     | 0.07  | 4.33       | 5S1    | 0.08  | 4.22       |
| E1     | 0.03  | 4.77       | E1     | 0.04  | 4.69       | 5S1    | 0.07  | 4.34       | B30    | 0.06  | 4.36       | 1S5    | 0.06  | 4.37       | OH1    | 0.05  | 4.49       |
| 1S3    | 0.03  | 4.87       | 2E     | 0.02  | 4.96       | 2E     | 0.06  | 4.44       | 5H4    | 0.04  | 4.61       | OH1    | 0.05  | 4.46       | 1S5    | 0.05  | 4.50       |
| 2E     | 0.01  | 5.32       | 14B    | 0.02  | 5.00       | B30    | 0.03  | 4.75       | 2E     | 0.04  | 4.61       | 5H4    | 0.05  | 4.54       | 1S3    | 0.04  | 4.68       |
| OH1    | 0.01  | 5.82       | 5S1    | 0.02  | 5.18       | B14    | 0.03  | 4.83       | 5S1    | 0.04  | 4.70       | 5S1    | 0.05  | 4.56       | B30    | 0.03  | 4.78       |
| 5S1    | 0.00  | 5.99       | E5     | 0.01  | 5.33       | 14B    | 0.02  | 5.10       | E4     | 0.02  | 4.99       | E4     | 0.03  | 4.90       | B14    | 0.02  | 4.95       |
| B30    | 0.00  | 5.99       | OH5    | 0.01  | 5.42       | OH1    | 0.02  | 5.12       | 14B    | 0.02  | 5.06       | B30    | 0.03  | 4.92       | 25B    | 0.01  | 5.39       |
| 2H3    | 0.00  | 6.31       | 5H4    | 0.01  | 5.53       | E5     | 0.01  | 5.35       | OH1    | 0.02  | 5.12       | B14    | 0.01  | 5.25       | OE     | 0.01  | 5.52       |
| 2SO    | 0.00  | 6.36       | 2SO    | 0.01  | 5.54       | 5H4    | 0.01  | 5.36       | B14    | 0.02  | 5.20       | OE     | 0.01  | 5.39       | E5     | 0.01  | 5.57       |
| 5HO    | 0.00  | 6.51       | OH1    | 0.01  | 5.77       | OH5    | 0.01  | 5.39       | E5     | 0.01  | 5.32       | 14B    | 0.01  | 5.44       | 2SO    | 0.01  | 5.62       |
| 3H4    | 0.00  | 6.55       | B14    | 0.00  | 5.92       | 2SO    | 0.01  | 5.42       | 5E     | 0.01  | 5.32       | 5E     | 0.01  | 5.49       | OH5    | 0.01  | 5.62       |
| E5     | 0.00  | 6.59       | 5E     | 0.00  | 5.99       | 25B    | 0.01  | 5.58       | 2SO    | 0.01  | 5.39       | E5     | 0.01  | 5.50       | 14B    | 0.01  | 5.63       |
| 3OB    | 0.00  | 6.63       | E4     | 0.00  | 6.01       | OE     | 0.01  | 5.78       | OH5    | 0.01  | 5.52       | OH5    | 0.01  | 5.54       | 5H4    | 0.01  | 5.65       |
| OH5    | 0.00  | 6.77       | 25B    | 0.00  | 6.04       | 5E     | 0.01  | 5.78       | 25B    | 0.01  | 5.83       | 25B    | 0.01  | 5.61       | 2H3    | 0.01  | 5.74       |
| B14    | 0.00  | 6.96       | 2H3    | 0.00  | 6.10       | E4     | 0.01  | 5.80       | OE     | 0.01  | 5.83       | 2SO    | 0.01  | 5.82       | 5E     | 0.00  | 6.07       |
| 25B    | 0.00  | 6.96       | 4H5    | 0.00  | 6.12       | 2H3    | 0.01  | 5.85       | 2H3    | 0.00  | 5.94       | 2H3    | 0.00  | 6.01       | 4H5    | 0.00  | 6.33       |
| E3     | 0.00  | 7.04       | OE     | 0.00  | 6.26       | 4H5    | 0.00  | 6.01       | 5HO    | 0.00  | 6.01       | 4H5    | 0.00  | 6.22       | E4     | 0.00  | 6.33       |
| OE     | 0.00  | 7.24       | E3     | 0.00  | 6.55       | 4E     | 0.00  | 6.72       | 4H5    | 0.00  | 6.14       | 3H4    | 0.00  | 6.48       | 4E     | 0.00  | 6.83       |
| 4H3    | 0.00  | 7.54       | 4E     | 0.00  | 7.04       | 5HO    | 0.00  | 6.77       | 3H4    | 0.00  | 6.51       | 5HO    | 0.00  | 6.51       | 5HO    | 0.00  | 6.83       |
| 4H5    | 0.00  | 7.78       | 3H4    | 0.00  | 7.13       | 3H4    | 0.00  | 7.04       | 4E     | 0.00  | 6.77       | EO     | 0.00  | 6.96       | 3H4    | 0.00  | 6.96       |
| 4E     | 0.00  | 7.78       | 5HO    | 0.00  | 7.37       | E3     | 0.00  | 7.13       | EO     | 0.00  | 7.13       | 4E     | 0.00  | 7.13       | E3     | 0.00  | 7.13       |
|        |       |            | 4H3    | 0.00  | 7.54       | 4H3    | 0.00  | 7.54       | 4H3    | 0.00  | 7.37       | 4H3    | 0.00  | 7.54       | EO     | 0.00  | 7.54       |
|        |       |            | EO     | 0.00  | 8.19       |        |       |            | E3     | 0.00  | 7.37       | E3     | 0.00  | 7.78       | 4H3    | 0.00  | 7.78       |
|        |       |            | 3E     | 0.00  | 8.19       | 1H2    | -     | -          | 3H2    | 0.00  | 7.78       | 1HO    | 0.00  | 7.78       | 1H2    | 0.00  | 8.19       |
|        |       |            |        |       |            | 1E     | -     | -          | 1E     | 0.00  | 8.19       | 1H2    | 0.00  | 8.19       | 3E     | 0.00  | 8.19       |
|        |       |            | 1H2    | -     | -          | EO     | -     | -          | 1HO    | 0.00  | 8.19       | E2     | 0.00  | 8.19       | 1HO    | 0.00  | 8.19       |
|        |       |            | 1E     | -     | -          | 3E     | -     | -          | E2     | 0.00  | 8.19       |        |       |            | E2     | 0.00  | 8.19       |
|        |       |            | 1HO    | -     | -          | 1HO    | -     | -          |        |       |            | 1E     | -     | -          |        |       |            |
|        |       |            | 3H2    | -     | -          | 3H2    | -     | -          | 1H2    | -     | -          | 3E     | -     | -          | 1E     | -     | -          |
|        |       |            | E2     | -     | -          | E2     | -     | -          | 3E     | -     | -          | 3H2    | -     | -          | 3H2    | -     | -          |

Table S19. Pyranose pucker populations (%) and relative free energies ( $\Delta G$ , kcal mol<sup>-1</sup>) from a 10  $\mu$ s simulation of **1** (numbered from reducing end)

| Glc:7  |       |            | Glc:8  |       |            | Glc:9  |       |            | Glc:10 |       |            | Glc:11 |       |            | Glc:12 |       |            |
|--------|-------|------------|--------|-------|------------|--------|-------|------------|--------|-------|------------|--------|-------|------------|--------|-------|------------|
| Pucker | %     | $\Delta G$ |
| 4C1    | 92.34 | 0.05       | 4C1    | 91.41 | 0.05       | 4C1    | 94.31 | 0.03       | 4C1    | 95.61 | 0.03       | 4C1    | 95.43 | 0.03       | 4C1    | 97.36 | 0.02       |
| OS2    | 3.62  | 1.97       | OS2    | 3.94  | 1.92       | OS2    | 2.57  | 2.17       | OS2    | 1.85  | 2.37       | OS2    | 2.48  | 2.19       | 1C4    | 2.13  | 2.28       |
| 1C4    | 1.95  | 2.33       | 1C4    | 2.02  | 2.32       | 1C4    | 0.97  | 2.75       | 1C4    | 1.00  | 2.73       | 1C4    | 0.89  | 2.80       | OS2    | 0.26  | 3.54       |
| 3OB    | 0.91  | 2.79       | 3OB    | 1.36  | 2.55       | 3OB    | 0.60  | 3.04       | B25    | 0.43  | 3.24       | B25    | 0.59  | 3.05       | B25    | 0.06  | 4.40       |
| B25    | 0.51  | 3.13       | B25    | 0.51  | 3.14       | B25    | 0.42  | 3.25       | 1S3    | 0.26  | 3.53       | 3OB    | 0.11  | 4.03       | 1S3    | 0.05  | 4.49       |
| 2H1    | 0.16  | 3.83       | 2H1    | 0.19  | 3.73       | 3S1    | 0.32  | 3.41       | 3OB    | 0.21  | 3.65       | 1S5    | 0.11  | 4.05       | 1S5    | 0.03  | 4.87       |
| 3S1    | 0.10  | 4.09       | E1     | 0.11  | 4.05       | 2H1    | 0.23  | 3.60       | 3S1    | 0.18  | 3.74       | 2H1    | 0.08  | 4.20       | B3O    | 0.02  | 5.02       |
| E1     | 0.08  | 4.24       | 1S5    | 0.09  | 4.17       | E1     | 0.13  | 3.95       | 2H1    | 0.09  | 4.14       | 1S3    | 0.07  | 4.29       | 3OB    | 0.02  | 5.14       |
| 1S5    | 0.07  | 4.27       | 3S1    | 0.08  | 4.23       | 5S1    | 0.11  | 4.03       | B3O    | 0.08  | 4.24       | E1     | 0.04  | 4.68       | 14B    | 0.02  | 5.21       |
| 5S1    | 0.05  | 4.57       | 1S3    | 0.07  | 4.33       | 1S5    | 0.08  | 4.26       | 1S5    | 0.07  | 4.29       | B3O    | 0.04  | 4.69       | 2H1    | 0.02  | 5.22       |
| 1S3    | 0.04  | 4.58       | 2E     | 0.05  | 4.50       | 1S3    | 0.06  | 4.45       | E1     | 0.05  | 4.46       | 5S1    | 0.02  | 4.94       | 2E     | 0.01  | 5.46       |
| 2E     | 0.04  | 4.64       | 5S1    | 0.04  | 4.62       | B14    | 0.05  | 4.46       | 5S1    | 0.04  | 4.64       | 2E     | 0.02  | 4.98       | 2S0    | 0.01  | 5.73       |
| B3O    | 0.02  | 5.07       | B3O    | 0.04  | 4.65       | B3O    | 0.04  | 4.70       | 2E     | 0.02  | 4.96       | 3S1    | 0.02  | 5.06       | E1     | 0.01  | 5.86       |
| B14    | 0.01  | 5.26       | 14B    | 0.02  | 5.07       | 2E     | 0.03  | 4.76       | 14B    | 0.02  | 5.21       | 14B    | 0.02  | 5.20       | E5     | 0.01  | 5.86       |
| OH1    | 0.01  | 5.30       | OH1    | 0.02  | 5.12       | OH1    | 0.02  | 5.15       | B14    | 0.02  | 5.22       | E5     | 0.01  | 5.42       | OH5    | 0.00  | 6.07       |
| OH5    | 0.01  | 5.36       | OH5    | 0.01  | 5.42       | OH5    | 0.01  | 5.38       | OH5    | 0.01  | 5.44       | OH5    | 0.01  | 5.48       | 2H3    | 0.00  | 6.16       |
| E5     | 0.01  | 5.40       | B14    | 0.01  | 5.46       | 14B    | 0.01  | 5.40       | OH1    | 0.01  | 5.45       | 5H4    | 0.01  | 5.52       | 3S1    | 0.00  | 6.33       |
| 5H4    | 0.01  | 5.43       | E5     | 0.01  | 5.50       | E5     | 0.01  | 5.40       | 5H4    | 0.01  | 5.47       | 2S0    | 0.01  | 5.67       | 5H4    | 0.00  | 6.33       |
| 14B    | 0.01  | 5.44       | 5H4    | 0.01  | 5.62       | 2S0    | 0.01  | 5.48       | E5     | 0.01  | 5.50       | OH1    | 0.01  | 5.83       | 5S1    | 0.00  | 6.36       |
| 5E     | 0.01  | 5.76       | 2S0    | 0.01  | 5.66       | 25B    | 0.01  | 5.55       | E4     | 0.01  | 5.77       | 25B    | 0.00  | 5.88       | 4H5    | 0.00  | 6.42       |
| 25B    | 0.01  | 5.83       | 25B    | 0.01  | 5.67       | 5H4    | 0.01  | 5.64       | 2S0    | 0.01  | 5.81       | 5E     | 0.00  | 5.94       | OH1    | 0.00  | 6.51       |
| OE     | 0.01  | 5.84       | 5E     | 0.01  | 5.67       | OE     | 0.00  | 5.90       | OE     | 0.00  | 6.01       | B14    | 0.00  | 5.96       | E4     | 0.00  | 6.59       |
| E4     | 0.00  | 5.95       | OE     | 0.00  | 5.96       | 4H5    | 0.00  | 6.07       | 5E     | 0.00  | 6.16       | E4     | 0.00  | 5.96       | OE     | 0.00  | 6.77       |
| 2S0    | 0.00  | 5.98       | E4     | 0.00  | 6.07       | 2H3    | 0.00  | 6.14       | 25B    | 0.00  | 6.18       | OE     | 0.00  | 6.18       | 5E     | 0.00  | 6.83       |
| 4H5    | 0.00  | 6.20       | 2H3    | 0.00  | 6.10       | E4     | 0.00  | 6.16       | 4H5    | 0.00  | 6.20       | 4H5    | 0.00  | 6.24       | B14    | 0.00  | 6.89       |
| 2H3    | 0.00  | 6.31       | 4H5    | 0.00  | 6.36       | 5E     | 0.00  | 6.18       | 2H3    | 0.00  | 6.31       | 2H3    | 0.00  | 6.33       | 25B    | 0.00  | 7.04       |
| 5HO    | 0.00  | 6.45       | 5HO    | 0.00  | 6.36       | 5HO    | 0.00  | 6.72       | E3     | 0.00  | 7.04       | 4E     | 0.00  | 6.96       | 4E     | 0.00  | 7.04       |
| 4E     | 0.00  | 6.89       | 4E     | 0.00  | 6.89       | 4E     | 0.00  | 7.13       | 4E     | 0.00  | 7.13       | 5HO    | 0.00  | 6.96       | E3     | 0.00  | 7.04       |
| 4H3    | 0.00  | 6.96       | 3H4    | 0.00  | 7.24       | 3H4    | 0.00  | 7.13       | 3H4    | 0.00  | 7.24       | 3H4    | 0.00  | 6.96       | 4H3    | 0.00  | 7.54       |
| E3     | 0.00  | 6.96       | E3     | 0.00  | 7.37       | E3     | 0.00  | 7.24       | 5HO    | 0.00  | 7.37       | E3     | 0.00  | 7.24       | 5HO    | 0.00  | 7.54       |
| 3H4    | 0.00  | 7.13       | 4H3    | 0.00  | 7.54       | EO     | 0.00  | 7.78       | 4H3    | 0.00  | 7.78       | 4H3    | 0.00  | 7.37       | 3H4    | 0.00  | 7.54       |
| EO     | 0.00  | 7.78       | EO     | 0.00  | 8.19       | 4H3    | 0.00  | 8.19       | EO     | 0.00  | 8.19       | 3E     | 0.00  | 8.19       | 3E     | 0.00  | 8.19       |
| 1HO    | 0.00  | 8.19       |        |       |            | 3E     | 0.00  | 8.19       | 3E     | 0.00  | 8.19       | 1HO    | 0.00  | 8.19       |        |       |            |
|        |       |            | 1H2    | -     | -          | 1HO    | 0.00  | 8.19       |        |       |            |        |       |            | 1H2    | -     | -          |
| 1H2    | -     | -          | 1E     | -     | -          |        |       |            | 1H2    | -     | -          | 1H2    | -     | -          | 1E     | -     | -          |
| 1E     | -     | -          | 3E     | -     | -          | 1H2    | -     | -          | 1E     | -     | -          | 1E     | -     | -          | EO     | -     | -          |
| 3E     | -     | -          | 1HO    | -     | -          | 1E     | -     | -          | 1HO    | -     | -          | EO     | -     | -          | 1HO    | -     | -          |
| 3H2    | -     | -          |
| E2     | -     | -          |

S19 continued

Table S20. Pyranose pucker populations (%) and relative free energies ( $\Delta G$ , kcal mol<sup>-1</sup>) from a 10  $\mu$ s simulation of **2** (strand A, numbered from reducing end)

| Glc:1  |       |            | Glc:2  |       |            | Glc:3  |       |            | Glc:4  |       |            | Glc:5  |       |            | Glc:6  |       |            |
|--------|-------|------------|--------|-------|------------|--------|-------|------------|--------|-------|------------|--------|-------|------------|--------|-------|------------|
| Pucker | %     | $\Delta G$ |
| 4C1    | 93.65 | 0.04       | 4C1    | 97.04 | 0.02       | 4C1    | 97.13 | 0.02       | 4C1    | 99.67 | 0.00       | 4C1    | 99.96 | 0.00       | 4C1    | 99.26 | 0.00       |
| 1C4    | 4.88  | 1.79       | OS2    | 1.59  | 2.46       | OS2    | 1.43  | 2.52       | OS2    | 0.13  | 3.94       | 2S0    | 0.01  | 5.42       | 1C4    | 0.51  | 3.13       |
| 1S5    | 0.46  | 3.19       | 1C4    | 0.74  | 2.91       | 1C4    | 0.97  | 2.75       | 1C4    | 0.12  | 3.98       | B30    | 0.01  | 5.61       | OS2    | 0.17  | 3.77       |
| B25    | 0.43  | 3.22       | B25    | 0.27  | 3.50       | 3OB    | 0.22  | 3.63       | B30    | 0.02  | 5.02       | 2H1    | 0.01  | 5.86       | B30    | 0.01  | 5.39       |
| OS2    | 0.21  | 3.66       | 3OB    | 0.11  | 4.02       | B25    | 0.11  | 4.04       | 3OB    | 0.01  | 5.28       | 2H3    | 0.00  | 6.07       | 2S0    | 0.01  | 5.48       |
| 5H4    | 0.12  | 4.00       | 1S5    | 0.05  | 4.55       | 2H1    | 0.03  | 4.80       | 2S0    | 0.01  | 5.59       | E1     | 0.00  | 6.31       | 3OB    | 0.01  | 5.59       |
| 5E     | 0.05  | 4.52       | 2H1    | 0.04  | 4.68       | B30    | 0.02  | 5.02       | 2H1    | 0.01  | 5.86       | 2E     | 0.00  | 6.33       | B25    | 0.01  | 5.74       |
| 2H1    | 0.05  | 4.54       | B30    | 0.03  | 4.74       | 2E     | 0.02  | 5.16       | 1S3    | 0.00  | 5.91       | OH1    | 0.00  | 6.63       | 2H1    | 0.00  | 6.02       |
| 14B    | 0.03  | 4.75       | 1S3    | 0.03  | 4.81       | 1S5    | 0.01  | 5.28       | E1     | 0.00  | 5.92       | OH5    | 0.00  | 6.89       | E1     | 0.00  | 6.14       |
| E1     | 0.03  | 4.78       | E1     | 0.02  | 5.05       | 1S3    | 0.01  | 5.32       | 2E     | 0.00  | 6.07       | E5     | 0.00  | 6.89       | 2H3    | 0.00  | 6.20       |
| E4     | 0.03  | 4.84       | 2E     | 0.02  | 5.18       | E1     | 0.01  | 5.32       | 2H3    | 0.00  | 6.28       | OE     | 0.00  | 6.96       | 2E     | 0.00  | 6.36       |
| 2E     | 0.02  | 5.15       | 2S0    | 0.01  | 5.56       | 2S0    | 0.01  | 5.36       | OH5    | 0.00  | 6.39       | E3     | 0.00  | 6.96       | E3     | 0.00  | 6.59       |
| 1S3    | 0.01  | 5.25       | OH5    | 0.01  | 5.64       | OH5    | 0.00  | 6.05       | OE     | 0.00  | 6.45       | 3OB    | 0.00  | 7.78       | OH1    | 0.00  | 6.83       |
| 5S1    | 0.01  | 5.66       | E5     | 0.01  | 5.66       | OH1    | 0.00  | 6.10       | E5     | 0.00  | 6.48       | 4H5    | 0.00  | 7.78       | OH5    | 0.00  | 6.89       |
| OH1    | 0.01  | 5.87       | 14B    | 0.01  | 5.80       | 5H4    | 0.00  | 6.12       | OH1    | 0.00  | 6.59       | 4H3    | 0.00  | 7.78       | 5E     | 0.00  | 6.89       |
| B30    | 0.00  | 5.92       | OH1    | 0.01  | 5.87       | 2H3    | 0.00  | 6.14       | E3     | 0.00  | 6.96       | 4E     | 0.00  | 8.19       | OE     | 0.00  | 6.96       |
| 2S0    | 0.00  | 6.14       | 5H4    | 0.00  | 5.88       | 3S1    | 0.00  | 6.24       | B25    | 0.00  | 7.13       |        |       |            | 4H5    | 0.00  | 7.13       |
| 2H3    | 0.00  | 6.22       | OE     | 0.00  | 6.10       | E5     | 0.00  | 6.33       | 3S1    | 0.00  | 7.78       | 5S1    | -     | -          | E5     | 0.00  | 7.37       |
| 5HO    | 0.00  | 6.39       | E4     | 0.00  | 6.10       | OE     | 0.00  | 6.42       | 4H5    | 0.00  | 7.78       | B14    | -     | -          | 5HO    | 0.00  | 7.54       |
| 3OB    | 0.00  | 6.42       | 3S1    | 0.00  | 6.26       | 5E     | 0.00  | 6.45       | 4E     | 0.00  | 7.78       | OS2    | -     | -          | 5H4    | 0.00  | 7.54       |
| 25B    | 0.00  | 6.59       | 4H5    | 0.00  | 6.26       | 14B    | 0.00  | 6.48       | 5S1    | 0.00  | 8.19       | B25    | -     | -          | 4H3    | 0.00  | 7.78       |
| OH5    | 0.00  | 6.63       | 5E     | 0.00  | 6.26       | 25B    | 0.00  | 6.51       | B14    | 0.00  | 8.19       | 1S5    | -     | -          | 3S1    | 0.00  | 8.19       |
| E5     | 0.00  | 6.72       | 25B    | 0.00  | 6.51       | E4     | 0.00  | 6.63       | 1S5    | 0.00  | 8.19       | 14B    | -     | -          |        |       |            |
| 3H4    | 0.00  | 6.72       | 5S1    | 0.00  | 6.67       | 4H5    | 0.00  | 6.89       | 14B    | 0.00  | 8.19       | 1S3    | -     | -          | 5S1    | -     | -          |
| B14    | 0.00  | 6.77       | 2H3    | 0.00  | 6.67       | 5HO    | 0.00  | 7.04       | 25B    | 0.00  | 8.19       | 3S1    | -     | -          | B14    | -     | -          |
| OE     | 0.00  | 6.77       | 4E     | 0.00  | 7.04       | E3     | 0.00  | 7.37       | 4H3    | 0.00  | 8.19       | 25B    | -     | -          | 1S5    | -     | -          |
| 4H5    | 0.00  | 7.24       | 3H4    | 0.00  | 7.04       | 4H3    | 0.00  | 7.54       | 5HO    | 0.00  | 8.19       | 1C4    | -     | -          | 14B    | -     | -          |
| 3S1    | 0.00  | 7.78       | E3     | 0.00  | 7.24       | 3H4    | 0.00  | 7.54       | 5E     | 0.00  | 8.19       | 1H2    | -     | -          | 1S3    | -     | -          |
| E3     | 0.00  | 7.78       | 5HO    | 0.00  | 7.37       | 5S1    | 0.00  | 7.78       | E4     | 0.00  | 8.19       | 1E     | -     | -          | 25B    | -     | -          |
|        |       |            | B14    | 0.00  | 7.54       | 4E     | 0.00  | 7.78       | 3H4    | 0.00  | 8.19       | 5HO    | -     | -          | 4E     | -     | -          |
|        |       |            | 4H3    | 0.00  | 7.54       |        |       |            |        |       |            | 5E     | -     | -          | 1H2    | -     | -          |
| 4E     | -     | -          |        |       |            |        |       |            |        |       |            | 5H4    | -     | -          | 1E     | -     | -          |
| 4H3    | -     | -          |        |       |            |        |       |            |        |       |            | E4     | -     | -          | E4     | -     | -          |
| 1H2    | -     | -          | 3H4    | -     | -          | 3H4    | -     | -          |
| 1E     | -     | -          | 1E     | -     | -          | 1E     | -     | -          | 5H4    | -     | -          | EO     | -     | -          | EO     | -     | -          |
| EO     | -     | -          |
| 3E     | -     | -          |
| 1HO    | -     | -          |
| 3H2    | -     | -          |
| E2     | -     | -          |

Table S20. Pyranose pucker populations (%) and relative free energies ( $\Delta G$ , kcal mol<sup>-1</sup>) from a 10  $\mu$ s simulation of **2** (strand A, numbered from reducing end)

| Glc:7  |       |            | Glc:8  |       |            | Glc:9  |       |            | Glc:10 |       |            | Glc:11 |       |            | Glc:12 |       |            |
|--------|-------|------------|--------|-------|------------|--------|-------|------------|--------|-------|------------|--------|-------|------------|--------|-------|------------|
| Pucker | %     | $\Delta G$ |
| 4C1    | 99.97 | 0.00       | 4C1    | 99.54 | 0.00       | 4C1    | 98.27 | 0.01       | 4C1    | 98.15 | 0.01       | 4C1    | 97.14 | 0.02       | 4C1    | 96.90 | 0.02       |
| B3O    | 0.01  | 5.80       | OS2    | 0.28  | 3.48       | OS2    | 1.07  | 2.69       | OS2    | 1.11  | 2.67       | OS2    | 1.57  | 2.46       | 1C4    | 2.34  | 2.23       |
| 2SO    | 0.01  | 5.81       | B25    | 0.07  | 4.28       | 3OB    | 0.56  | 3.07       | 3OB    | 0.37  | 3.32       | 1C4    | 0.71  | 2.94       | OS2    | 0.49  | 3.16       |
| OS2    | 0.00  | 6.02       | 1C4    | 0.03  | 4.85       | 1C4    | 0.03  | 4.92       | 1C4    | 0.21  | 3.66       | 3OB    | 0.21  | 3.65       | B25    | 0.08  | 4.21       |
| 2H3    | 0.00  | 6.14       | B3O    | 0.02  | 5.12       | B3O    | 0.02  | 5.12       | B25    | 0.06  | 4.45       | B25    | 0.20  | 3.67       | 3OB    | 0.04  | 4.63       |
| E5     | 0.00  | 6.22       | 1S5    | 0.01  | 5.29       | 2SO    | 0.01  | 5.45       | B3O    | 0.02  | 5.01       | B3O    | 0.03  | 4.72       | 1S3    | 0.03  | 4.78       |
| 2H1    | 0.00  | 6.26       | 2SO    | 0.01  | 5.29       | B25    | 0.01  | 5.49       | 1S3    | 0.01  | 5.24       | 1S3    | 0.03  | 4.87       | 1S5    | 0.02  | 5.00       |
| E1     | 0.00  | 6.42       | 3OB    | 0.01  | 5.31       | 2H1    | 0.01  | 5.49       | E5     | 0.01  | 5.28       | 1S5    | 0.02  | 4.96       | B3O    | 0.02  | 5.16       |
| E3     | 0.00  | 6.42       | E5     | 0.00  | 5.95       | E5     | 0.01  | 5.63       | OH5    | 0.01  | 5.30       | 2H1    | 0.01  | 5.33       | 2E     | 0.01  | 5.28       |
| OH5    | 0.00  | 6.48       | OH5    | 0.00  | 6.02       | OH5    | 0.01  | 5.80       | 2H1    | 0.01  | 5.67       | OH5    | 0.01  | 5.37       | 2H1    | 0.01  | 5.39       |
| 2E     | 0.00  | 6.83       | 2H1    | 0.00  | 6.20       | E1     | 0.00  | 5.88       | 2SO    | 0.01  | 5.81       | 5H4    | 0.01  | 5.39       | E5     | 0.01  | 5.40       |
| 4H5    | 0.00  | 7.04       | E3     | 0.00  | 6.20       | E3     | 0.00  | 6.24       | E1     | 0.00  | 5.88       | E5     | 0.01  | 5.41       | 14B    | 0.01  | 5.41       |
| OE     | 0.00  | 7.04       | 2H3    | 0.00  | 6.59       | 2E     | 0.00  | 6.24       | 1S5    | 0.00  | 6.02       | E1     | 0.01  | 5.72       | OH5    | 0.01  | 5.68       |
| OH1    | 0.00  | 7.24       | E1     | 0.00  | 6.67       | 2H3    | 0.00  | 6.42       | E3     | 0.00  | 6.20       | 2E     | 0.01  | 5.85       | 2SO    | 0.01  | 5.73       |
| B25    | 0.00  | 7.37       | 4H5    | 0.00  | 6.89       | OE     | 0.00  | 6.48       | 2E     | 0.00  | 6.31       | 2SO    | 0.01  | 5.87       | 2H3    | 0.00  | 5.88       |
| 1S3    | 0.00  | 7.78       | OH1    | 0.00  | 7.04       | 4H5    | 0.00  | 6.77       | 4H5    | 0.00  | 6.48       | E4     | 0.00  | 5.95       | 4H5    | 0.00  | 6.10       |
| 4H3    | 0.00  | 8.19       | OE     | 0.00  | 7.24       | OH1    | 0.00  | 6.83       | OE     | 0.00  | 6.59       | 4H5    | 0.00  | 6.07       | E1     | 0.00  | 6.12       |
|        |       |            | 2E     | 0.00  | 7.24       | 25B    | 0.00  | 7.04       | OH1    | 0.00  | 6.59       | 14B    | 0.00  | 6.24       | 3S1    | 0.00  | 6.20       |
| 5S1    | -     | -          | 4H3    | 0.00  | 7.37       | 5HO    | 0.00  | 7.24       | 2H3    | 0.00  | 6.83       | 5E     | 0.00  | 6.28       | OE     | 0.00  | 6.45       |
| B14    | -     | -          | 5E     | 0.00  | 7.54       | 4H3    | 0.00  | 7.37       | 14B    | 0.00  | 6.89       | OE     | 0.00  | 6.39       | 5H4    | 0.00  | 6.67       |
| 1S5    | -     | -          | 14B    | 0.00  | 7.78       | 5S1    | 0.00  | 7.54       | 4H3    | 0.00  | 6.89       | E3     | 0.00  | 6.42       | 5E     | 0.00  | 6.83       |
| 14B    | -     | -          | E4     | 0.00  | 8.19       | 5E     | 0.00  | 7.78       | E4     | 0.00  | 7.13       | 2H3    | 0.00  | 6.55       | 4E     | 0.00  | 6.89       |
| 3OB    | -     | -          |        |       |            | 1S5    | 0.00  | 8.19       | 5HO    | 0.00  | 7.24       | OH1    | 0.00  | 6.63       | E3     | 0.00  | 6.89       |
| 3S1    | -     | -          | 5S1    | -     | -          | 1S3    | 0.00  | 8.19       | 4E     | 0.00  | 7.37       | 3S1    | 0.00  | 6.67       | OH1    | 0.00  | 6.96       |
| 25B    | -     | -          | B14    | -     | -          | 3S1    | 0.00  | 8.19       | 5E     | 0.00  | 7.54       | 4H3    | 0.00  | 6.83       | E4     | 0.00  | 6.96       |
| 4E     | -     | -          | 1S3    | -     | -          | 4E     | 0.00  | 8.19       | 5H4    | 0.00  | 7.54       | 5S1    | 0.00  | 6.96       | 5HO    | 0.00  | 7.04       |
| 1C4    | -     | -          | 3S1    | -     | -          |        |       |            | 3S1    | 0.00  | 8.19       | B14    | 0.00  | 7.24       | 4H3    | 0.00  | 7.13       |
| 1H2    | -     | -          | 25B    | -     | -          | B14    | -     | -          | EO     | 0.00  | 8.19       | 4E     | 0.00  | 7.24       | 5S1    | 0.00  | 7.37       |
| 1E     | -     | -          | 4E     | -     | -          | 14B    | -     | -          |        |       |            | 5HO    | 0.00  | 7.37       | 25B    | 0.00  | 7.37       |
| 5HO    | -     | -          | 1H2    | -     | -          | 1H2    | -     | -          | 5S1    | -     | -          | 3H4    | 0.00  | 7.54       | B14    | 0.00  | 7.54       |
| 5E     | -     | -          | 1E     | -     | -          | 1E     | -     | -          | B14    | -     | -          | 25B    | 0.00  | 7.78       | 3H4    | 0.00  | 8.19       |
| 5H4    | -     | -          | 5HO    | -     | -          | 5H4    | -     | -          | 25B    | -     | -          |        |       |            | EO     | 0.00  | 8.19       |
| E4     | -     | -          | 5H4    | -     | -          | E4     | -     | -          | 1H2    | -     | -          | 1H2    | -     | -          |        |       |            |
| 3H4    | -     | -          | 3H4    | -     | -          | 3H4    | -     | -          | 1E     | -     | -          | 1E     | -     | -          | 1H2    | -     | -          |
| EO     | -     | -          | EO     | -     | -          | EO     | -     | -          | 3H4    | -     | -          | EO     | -     | -          | 1E     | -     | -          |
| 3E     | -     | -          |
| 1HO    | -     | -          |
| 3H2    | -     | -          |
| E2     | -     | -          |

S20 continued

Table S20. Pyranose pucker populations (%) and relative free energies ( $\Delta G$ , kcal mol<sup>-1</sup>) from a 10  $\mu$ s simulation of **2** (strand B, numbered from reducing end)

| Glc:1  |       |            | Glc:2  |       |            | Glc:3  |       |            | Glc:4  |       |            | Glc:5  |       |            | Glc:6  |       |            |
|--------|-------|------------|--------|-------|------------|--------|-------|------------|--------|-------|------------|--------|-------|------------|--------|-------|------------|
| Pucker | %     | $\Delta G$ |
| 4C1    | 91.46 | 0.05       | 4C1    | 96.81 | 0.02       | 4C1    | 99.22 | 0.00       | 4C1    | 99.23 | 0.00       | 4C1    | 99.95 | 0.00       | 4C1    | 99.96 | 0.00       |
| 1C4    | 6.44  | 1.63       | OS2    | 1.64  | 2.44       | OS2    | 0.40  | 3.28       | 1C4    | 0.31  | 3.42       | OS2    | 0.02  | 4.99       | OS2    | 0.01  | 5.37       |
| 1S5    | 0.74  | 2.91       | 1C4    | 0.91  | 2.79       | 2H1    | 0.07  | 4.30       | OS2    | 0.27  | 3.51       | B25    | 0.01  | 5.63       | 2SO    | 0.01  | 5.75       |
| B25    | 0.64  | 3.00       | B25    | 0.21  | 3.66       | 1C4    | 0.07  | 4.31       | B3O    | 0.04  | 4.69       | B3O    | 0.00  | 6.01       | B3O    | 0.00  | 5.99       |
| OS2    | 0.29  | 3.47       | 3OB    | 0.14  | 3.92       | B25    | 0.05  | 4.49       | 1S3    | 0.03  | 4.77       | 2SO    | 0.00  | 6.31       | B25    | 0.00  | 6.08       |
| 5H4    | 0.13  | 3.93       | 2H1    | 0.05  | 4.49       | 3OB    | 0.03  | 4.78       | B25    | 0.03  | 4.80       | 2H3    | 0.00  | 6.39       | 2H3    | 0.00  | 6.08       |
| 14B    | 0.05  | 4.47       | B3O    | 0.05  | 4.54       | 2E     | 0.03  | 4.80       | 5S1    | 0.01  | 5.25       | 2H1    | 0.00  | 6.42       | OH5    | 0.00  | 6.48       |
| 5E     | 0.05  | 4.50       | 1S3    | 0.04  | 4.58       | B3O    | 0.03  | 4.84       | 2H1    | 0.01  | 5.42       | E1     | 0.00  | 6.67       | 2H1    | 0.00  | 6.59       |
| 2H1    | 0.05  | 4.51       | 1S5    | 0.04  | 4.58       | E1     | 0.03  | 4.92       | 3OB    | 0.01  | 5.47       | E3     | 0.00  | 6.83       | E5     | 0.00  | 6.63       |
| E4     | 0.04  | 4.66       | E1     | 0.02  | 4.93       | 1S3    | 0.02  | 5.03       | 3S1    | 0.01  | 5.54       | OH5    | 0.00  | 6.96       | E1     | 0.00  | 6.77       |
| E1     | 0.03  | 4.82       | 2E     | 0.02  | 5.12       | 1S5    | 0.01  | 5.34       | B14    | 0.01  | 5.73       | 2E     | 0.00  | 6.96       | E3     | 0.00  | 6.77       |
| 1S3    | 0.02  | 4.97       | 2SO    | 0.01  | 5.42       | 2SO    | 0.01  | 5.54       | E1     | 0.01  | 5.75       | E5     | 0.00  | 7.13       | OH1    | 0.00  | 6.89       |
| 2E     | 0.02  | 5.20       | 14B    | 0.01  | 5.64       | OH1    | 0.00  | 5.98       | 2SO    | 0.00  | 5.88       | OH1    | 0.00  | 7.13       | 2E     | 0.00  | 6.96       |
| 5S1    | 0.01  | 5.80       | 5H4    | 0.01  | 5.66       | OH5    | 0.00  | 6.04       | 1S5    | 0.00  | 5.98       | 4H3    | 0.00  | 7.37       | 4H5    | 0.00  | 7.54       |
| OH1    | 0.01  | 5.86       | E5     | 0.01  | 5.67       | E5     | 0.00  | 6.04       | 2E     | 0.00  | 6.01       | OE     | 0.00  | 7.54       | OE     | 0.00  | 7.54       |
| B3O    | 0.00  | 5.94       | OH1    | 0.01  | 5.81       | 14B    | 0.00  | 6.05       | OH1    | 0.00  | 6.33       | 1S5    | 0.00  | 7.78       | 4E     | 0.00  | 7.78       |
| 2SO    | 0.00  | 6.14       | OH5    | 0.01  | 5.84       | 25B    | 0.00  | 6.10       | OE     | 0.00  | 6.42       | 5E     | 0.00  | 8.19       | 4H3    | 0.00  | 7.78       |
| 2H3    | 0.00  | 6.31       | 5E     | 0.00  | 6.04       | 5S1    | 0.00  | 6.22       | 2H3    | 0.00  | 6.45       |        |       |            | 1S5    | 0.00  | 8.19       |
| 3OB    | 0.00  | 6.33       | 3S1    | 0.00  | 6.14       | 2H3    | 0.00  | 6.26       | E5     | 0.00  | 6.51       | 5S1    | -     | -          | 25B    | 0.00  | 8.19       |
| 5HO    | 0.00  | 6.55       | 2H3    | 0.00  | 6.14       | OE     | 0.00  | 6.31       | 14B    | 0.00  | 6.55       | B14    | -     | -          |        |       |            |
| B14    | 0.00  | 6.83       | OE     | 0.00  | 6.16       | 3S1    | 0.00  | 6.45       | OH5    | 0.00  | 6.55       | 14B    | -     | -          | 5S1    | -     | -          |
| E5     | 0.00  | 6.83       | E4     | 0.00  | 6.16       | 5H4    | 0.00  | 6.89       | 5H4    | 0.00  | 6.59       | 1S3    | -     | -          | B14    | -     | -          |
| OE     | 0.00  | 6.83       | 5S1    | 0.00  | 6.31       | E4     | 0.00  | 6.89       | E4     | 0.00  | 6.83       | 3OB    | -     | -          | 14B    | -     | -          |
| OH5    | 0.00  | 6.96       | 4H5    | 0.00  | 6.42       | B14    | 0.00  | 6.96       | 5E     | 0.00  | 7.04       | 3S1    | -     | -          | 1S3    | -     | -          |
| 3S1    | 0.00  | 7.13       | 25B    | 0.00  | 7.04       | E3     | 0.00  | 7.13       | E3     | 0.00  | 7.13       | 25B    | -     | -          | 3OB    | -     | -          |
| 25B    | 0.00  | 7.13       | 3H4    | 0.00  | 7.13       | 4H5    | 0.00  | 7.24       | 25B    | 0.00  | 7.24       | 4H5    | -     | -          | 3S1    | -     | -          |
| 3H4    | 0.00  | 7.13       | 5HO    | 0.00  | 7.24       | 5E     | 0.00  | 7.54       | 3H4    | 0.00  | 7.54       | 4E     | -     | -          | 1C4    | -     | -          |
| E3     | 0.00  | 7.24       | E3     | 0.00  | 7.37       | 5HO    | 0.00  | 7.78       | 4H5    | 0.00  | 7.78       | 1C4    | -     | -          | 1H2    | -     | -          |
| 4H5    | 0.00  | 7.37       | B14    | 0.00  | 7.54       | 4H3    | 0.00  | 8.19       | 5HO    | 0.00  | 7.78       | 1H2    | -     | -          | 1E     | -     | -          |
| 4E     | 0.00  | 8.19       | 4E     | 0.00  | 7.54       |        |       |            | 3E     | 0.00  | 7.78       | 1E     | -     | -          | 5HO    | -     | -          |
| 4H3    | 0.00  | 8.19       | EO     | 0.00  | 8.19       | 4E     | -     | -          | 4H3    | 0.00  | 8.19       | 5HO    | -     | -          | 5E     | -     | -          |
|        |       |            | 3E     | 0.00  | 8.19       | 1H2    | -     | -          | EO     | 0.00  | 8.19       | 5H4    | -     | -          | 5H4    | -     | -          |
| 1H2    | -     | -          |        |       |            | 1E     | -     | -          |        |       |            | E4     | -     | -          | E4     | -     | -          |
| 1E     | -     | -          | 4H3    | -     | -          | 3H4    | -     | -          | 4E     | -     | -          | 3H4    | -     | -          | 3H4    | -     | -          |
| EO     | -     | -          | 1H2    | -     | -          | EO     | -     | -          | 1H2    | -     | -          | EO     | -     | -          | EO     | -     | -          |
| 3E     | -     | -          | 1E     | -     | -          | 3E     | -     | -          | 1E     | -     | -          | 3E     | -     | -          | 3E     | -     | -          |
| 1HO    | -     | -          |
| 3H2    | -     | -          |
| E2     | -     | -          |

S20 continued



Table S20. Pyranose pucker populations (%) and relative free energies ( $\Delta G$ , kcal mol<sup>-1</sup>) from a 10  $\mu$ s simulation of **2** (strand B, numbered from reducing end)

| Glc:7  |       |            | Glc:8  |       |            | Glc:9  |       |            | Glc:10 |       |            | Glc:11 |       |            | Glc:12 |       |            |
|--------|-------|------------|--------|-------|------------|--------|-------|------------|--------|-------|------------|--------|-------|------------|--------|-------|------------|
| Pucker | %     | $\Delta G$ |
| 4C1    | 99.97 | 0.00       | 4C1    | 99.86 | 0.00       | 4C1    | 97.88 | 0.01       | 4C1    | 98.08 | 0.01       | 4C1    | 99.11 | 0.01       | 4C1    | 93.96 | 0.04       |
| B3O    | 0.01  | 5.50       | OS2    | 0.10  | 4.09       | OS2    | 1.22  | 2.61       | OS2    | 1.08  | 2.69       | OS2    | 0.50  | 3.14       | 1C4    | 5.22  | 1.75       |
| 2SO    | 0.01  | 5.73       | B3O    | 0.01  | 5.72       | 3OB    | 0.45  | 3.21       | 1C4    | 0.31  | 3.42       | 1C4    | 0.13  | 3.96       | OS2    | 0.51  | 3.13       |
| 2H3    | 0.00  | 6.20       | 3OB    | 0.01  | 5.75       | 1C4    | 0.30  | 3.45       | 3OB    | 0.23  | 3.60       | 3OB    | 0.07  | 4.32       | B25    | 0.10  | 4.12       |
| 2H1    | 0.00  | 6.26       | 2SO    | 0.00  | 5.90       | B25    | 0.11  | 4.04       | B25    | 0.15  | 3.87       | B25    | 0.05  | 4.49       | 3OB    | 0.05  | 4.52       |
| OH5    | 0.00  | 6.39       | E5     | 0.00  | 5.98       | B3O    | 0.01  | 5.34       | B3O    | 0.04  | 4.63       | B3O    | 0.05  | 4.50       | 1S3    | 0.04  | 4.63       |
| E5     | 0.00  | 6.48       | OH5    | 0.00  | 6.05       | E5     | 0.01  | 5.53       | 1S3    | 0.03  | 4.88       | E5     | 0.01  | 5.28       | 1S5    | 0.03  | 4.90       |
| E1     | 0.00  | 6.55       | B25    | 0.00  | 6.14       | 2SO    | 0.01  | 5.75       | 2H1    | 0.01  | 5.31       | OH5    | 0.01  | 5.35       | B3O    | 0.02  | 5.15       |
| E3     | 0.00  | 6.59       | E1     | 0.00  | 6.20       | OH5    | 0.01  | 5.87       | E5     | 0.01  | 5.32       | 2SO    | 0.01  | 5.40       | 14B    | 0.01  | 5.28       |
| 3OB    | 0.00  | 6.67       | 2H1    | 0.00  | 6.31       | E3     | 0.00  | 6.16       | 2SO    | 0.01  | 5.49       | 2H1    | 0.01  | 5.48       | 2E     | 0.01  | 5.38       |
| OH1    | 0.00  | 6.83       | 2H3    | 0.00  | 6.39       | 2H1    | 0.00  | 6.26       | 1S5    | 0.01  | 5.50       | 1S3    | 0.01  | 5.59       | 2H1    | 0.01  | 5.46       |
| 2E     | 0.00  | 6.96       | E3     | 0.00  | 6.45       | 1S5    | 0.00  | 6.36       | OH5    | 0.01  | 5.51       | E1     | 0.01  | 5.63       | E5     | 0.01  | 5.50       |
| OE     | 0.00  | 7.37       | 2E     | 0.00  | 6.72       | E1     | 0.00  | 6.36       | E1     | 0.01  | 5.57       | 1S5    | 0.00  | 5.88       | 2SO    | 0.01  | 5.72       |
| 4H5    | 0.00  | 7.54       | OE     | 0.00  | 6.96       | OE     | 0.00  | 6.39       | 3S1    | 0.01  | 5.59       | 4H5    | 0.00  | 5.98       | OH5    | 0.01  | 5.84       |
| OS2    | 0.00  | 7.78       | 4H5    | 0.00  | 7.04       | 2H3    | 0.00  | 6.39       | 2E     | 0.00  | 5.88       | 2E     | 0.00  | 6.02       | 4H5    | 0.00  | 5.96       |
| 4E     | 0.00  | 7.78       | 4H3    | 0.00  | 7.04       | 4H5    | 0.00  | 6.51       | 4H5    | 0.00  | 6.24       | E3     | 0.00  | 6.31       | 2H3    | 0.00  | 5.96       |
| 4H3    | 0.00  | 8.19       | OH1    | 0.00  | 7.13       | OH1    | 0.00  | 7.04       | E3     | 0.00  | 6.24       | 3S1    | 0.00  | 6.33       | E1     | 0.00  | 6.10       |
|        |       |            | 4E     | 0.00  | 7.78       | 5E     | 0.00  | 7.04       | OH1    | 0.00  | 6.26       | OE     | 0.00  | 6.45       | 5H4    | 0.00  | 6.10       |
|        |       |            |        |       |            | 4H3    | 0.00  | 7.24       | 14B    | 0.00  | 6.39       | 2H3    | 0.00  | 6.45       | 5E     | 0.00  | 6.36       |
| 5S1    | -     | -          |        |       |            | 2E     | 0.00  | 7.37       | OE     | 0.00  | 6.67       | OH1    | 0.00  | 6.59       | OE     | 0.00  | 6.48       |
| B14    | -     | -          | 5S1    | -     | -          | 5HO    | 0.00  | 7.37       | 2H3    | 0.00  | 6.83       | 4H3    | 0.00  | 6.67       | 3S1    | 0.00  | 6.72       |
| B25    | -     | -          | B14    | -     | -          | 5H4    | 0.00  | 7.37       | 5H4    | 0.00  | 6.83       | 5S1    | 0.00  | 6.89       | E4     | 0.00  | 6.77       |
| 1S5    | -     | -          | 1S5    | -     | -          | 4E     | 0.00  | 7.78       | 4H3    | 0.00  | 7.04       | 5H4    | 0.00  | 7.04       | 5S1    | 0.00  | 6.89       |
| 14B    | -     | -          | 14B    | -     | -          | 3S1    | 0.00  | 8.19       | 5E     | 0.00  | 7.13       | 5E     | 0.00  | 7.13       | 4E     | 0.00  | 7.04       |
| 1S3    | -     | -          | 1S3    | -     | -          |        |       |            | E4     | 0.00  | 7.24       | 14B    | 0.00  | 7.24       | OH1    | 0.00  | 7.04       |
| 3S1    | -     | -          | 3S1    | -     | -          | 5S1    | -     | -          | 25B    | 0.00  | 7.37       | 4E     | 0.00  | 7.37       | E3     | 0.00  | 7.13       |
| 25B    | -     | -          | 25B    | -     | -          | B14    | -     | -          | 3H4    | 0.00  | 7.37       | B14    | 0.00  | 7.78       | 4H3    | 0.00  | 7.24       |
| 1C4    | -     | -          | 1C4    | -     | -          | 14B    | -     | -          | 5S1    | 0.00  | 8.19       | 25B    | 0.00  | 7.78       | 5HO    | 0.00  | 7.24       |
| 1H2    | -     | -          | 1H2    | -     | -          | 1S3    | -     | -          | 4E     | 0.00  | 8.19       | 5HO    | 0.00  | 7.78       | 25B    | 0.00  | 7.37       |
| 1E     | -     | -          | 1E     | -     | -          | 25B    | -     | -          | 5HO    | 0.00  | 8.19       |        |       |            | 3H4    | 0.00  | 7.37       |
| 5HO    | -     | -          | 5HO    | -     | -          | 1H2    | -     | -          |        |       |            | 1H2    | -     | -          | B14    | 0.00  | 7.54       |
| 5E     | -     | -          | 5E     | -     | -          | 1E     | -     | -          | B14    | -     | -          | 1E     | -     | -          | EO     | 0.00  | 8.19       |
| 5H4    | -     | -          | 5H4    | -     | -          | E4     | -     | -          | 1H2    | -     | -          | E4     | -     | -          | 3H2    | 0.00  | 8.19       |
| E4     | -     | -          | E4     | -     | -          | 3H4    | -     | -          | 1E     | -     | -          | 3H4    | -     | -          |        |       |            |
| 3H4    | -     | -          | 3H4    | -     | -          | EO     | -     | -          | EO     | -     | -          | EO     | -     | -          | 1H2    | -     | -          |
| EO     | -     | -          | EO     | -     | -          | 3E     | -     | -          | 3E     | -     | -          | 3E     | -     | -          | 1E     | -     | -          |
| 3E     | -     | -          | 3E     | -     | -          | 1HO    | -     | -          | 1HO    | -     | -          | 1HO    | -     | -          | 3E     | -     | -          |
| 1HO    | -     | -          | 1HO    | -     | -          | 3H2    | -     | -          | 3H2    | -     | -          | 3H2    | -     | -          | 1HO    | -     | -          |
| 3H2    | -     | -          | 3H2    | -     | -          | E2     | -     | -          |
| E2     | -     | -          | E2     | -     | -          |        |       |            |        |       |            |        |       |            |        |       |            |

S20 continued

Table S21. Pyranose pucker populations (%) and relative free energies ( $\Delta G$ , kcal mol<sup>-1</sup>) from a 10  $\mu$ s simulation of **3** (strand A, numbered from reducing end)

| Glc:1  |       |            | Glc:2  |       |            | Glc:3  |       |            | Glc:4  |       |            | Glc:5  |       |            | Glc:6  |       |            |
|--------|-------|------------|--------|-------|------------|--------|-------|------------|--------|-------|------------|--------|-------|------------|--------|-------|------------|
| Pucker | %     | $\Delta G$ |
| 4C1    | 90.04 | 0.06       | 4C1    | 98.15 | 0.01       | 4C1    | 96.44 | 0.02       | 4C1    | 98.20 | 0.01       | 4C1    | 97.97 | 0.01       | 4C1    | 97.97 | 0.01       |
| 1C4    | 8.72  | 1.45       | OS2    | 1.00  | 2.73       | OS2    | 3.10  | 2.06       | OS2    | 1.27  | 2.59       | OS2    | 1.26  | 2.59       | OS2    | 1.55  | 2.47       |
| B25    | 0.34  | 3.36       | 1C4    | 0.53  | 3.10       | 1C4    | 0.23  | 3.60       | 1C4    | 0.43  | 3.23       | 1C4    | 0.66  | 2.98       | 1C4    | 0.28  | 3.50       |
| 1S5    | 0.34  | 3.37       | B25    | 0.11  | 4.04       | B25    | 0.14  | 3.89       | B25    | 0.05  | 4.49       | B25    | 0.03  | 4.89       | B3O    | 0.08  | 4.22       |
| OS2    | 0.17  | 3.80       | B3O    | 0.06  | 4.45       | 3OB    | 0.02  | 5.09       | 3OB    | 0.01  | 5.28       | 2S0    | 0.03  | 4.91       | 2S0    | 0.04  | 4.68       |
| 5H4    | 0.13  | 3.95       | 1S3    | 0.05  | 4.48       | B3O    | 0.02  | 5.15       | OH5    | 0.01  | 5.43       | 3OB    | 0.02  | 5.06       | 3OB    | 0.03  | 4.73       |
| 2H1    | 0.05  | 4.57       | 3OB    | 0.03  | 4.83       | 1S3    | 0.01  | 5.29       | 1S5    | 0.01  | 5.52       | OH5    | 0.01  | 5.28       | B25    | 0.02  | 5.20       |
| 5E     | 0.04  | 4.59       | 5H4    | 0.01  | 5.62       | OH5    | 0.01  | 5.44       | 2S0    | 0.01  | 5.75       | B3O    | 0.01  | 5.38       | OH5    | 0.01  | 5.25       |
| E4     | 0.04  | 4.61       | 1S5    | 0.01  | 5.65       | 2S0    | 0.01  | 5.68       | E5     | 0.00  | 6.12       | E5     | 0.00  | 5.90       | 1S3    | 0.00  | 5.92       |
| 14B    | 0.03  | 4.80       | 2H1    | 0.01  | 5.67       | E5     | 0.01  | 5.85       | B3O    | 0.00  | 6.26       | OE     | 0.00  | 6.33       | OE     | 0.00  | 6.14       |
| E1     | 0.03  | 4.89       | E5     | 0.01  | 5.67       | 5H4    | 0.00  | 6.05       | E3     | 0.00  | 6.67       | 5E     | 0.00  | 6.55       | E5     | 0.00  | 6.18       |
| 1S3    | 0.02  | 5.06       | OH5    | 0.01  | 5.84       | OE     | 0.00  | 6.22       | OE     | 0.00  | 6.83       | E3     | 0.00  | 6.72       | E3     | 0.00  | 6.48       |
| 2E     | 0.02  | 5.20       | 2S0    | 0.01  | 5.85       | 2H1    | 0.00  | 6.36       | 5H4    | 0.00  | 6.89       | 4H5    | 0.00  | 6.89       | E1     | 0.00  | 6.63       |
| 5S1    | 0.01  | 5.37       | E1     | 0.00  | 5.91       | E4     | 0.00  | 6.36       | 5E     | 0.00  | 6.96       | 5H4    | 0.00  | 6.96       | 2H3    | 0.00  | 6.63       |
| B3O    | 0.01  | 5.75       | 2E     | 0.00  | 6.12       | E1     | 0.00  | 6.48       | 14B    | 0.00  | 7.04       | 2H3    | 0.00  | 7.37       | 5HO    | 0.00  | 6.67       |
| 2S0    | 0.01  | 5.86       | 14B    | 0.00  | 6.16       | 1S5    | 0.00  | 6.59       | 2H3    | 0.00  | 7.37       | 2E     | 0.00  | 7.37       | 5E     | 0.00  | 6.72       |
| OH1    | 0.00  | 5.95       | 4H5    | 0.00  | 6.20       | 3S1    | 0.00  | 6.83       | 2H1    | 0.00  | 7.54       | 2H1    | 0.00  | 7.54       | 2H1    | 0.00  | 6.96       |
| 2H3    | 0.00  | 6.10       | E4     | 0.00  | 6.20       | 14B    | 0.00  | 6.89       | 4H3    | 0.00  | 7.54       | E4     | 0.00  | 7.54       | OH1    | 0.00  | 7.04       |
| 25B    | 0.00  | 6.26       | 5E     | 0.00  | 6.36       | 2E     | 0.00  | 6.89       | E4     | 0.00  | 7.54       | E1     | 0.00  | 7.78       | 5H4    | 0.00  | 7.24       |
| 3OB    | 0.00  | 6.48       | OE     | 0.00  | 6.51       | 5E     | 0.00  | 6.89       | 1S3    | 0.00  | 7.78       | 4H3    | 0.00  | 7.78       | 4H5    | 0.00  | 7.54       |
| 5HO    | 0.00  | 6.63       | 2H3    | 0.00  | 6.51       | E3     | 0.00  | 6.96       | E1     | 0.00  | 7.78       | 5HO    | 0.00  | 7.78       | 4H3    | 0.00  | 7.54       |
| 3S1    | 0.00  | 6.72       | OH1    | 0.00  | 6.63       | 2H3    | 0.00  | 6.96       | 4H5    | 0.00  | 7.78       | 1S5    | 0.00  | 8.19       | 2E     | 0.00  | 7.78       |
| 3H4    | 0.00  | 6.77       | 3S1    | 0.00  | 6.72       | 4H5    | 0.00  | 7.13       | 4E     | 0.00  | 7.78       | 25B    | 0.00  | 8.19       | 3H4    | 0.00  | 7.78       |
| OE     | 0.00  | 6.96       | 4E     | 0.00  | 7.13       | 5HO    | 0.00  | 7.24       | 5HO    | 0.00  | 7.78       | OH1    | 0.00  | 8.19       | 14B    | 0.00  | 8.19       |
| B14    | 0.00  | 7.04       | 5S1    | 0.00  | 7.37       | OH1    | 0.00  | 7.37       | OH1    | 0.00  | 8.19       | 3E     | 0.00  | 8.19       | 25B    | 0.00  | 8.19       |
| E5     | 0.00  | 7.04       | E3     | 0.00  | 7.37       | 3H4    | 0.00  | 7.54       | 2E     | 0.00  | 8.19       | 3H2    | 0.00  | 8.19       | E4     | 0.00  | 8.19       |
| E3     | 0.00  | 7.04       | 3H4    | 0.00  | 7.37       | 4H3    | 0.00  | 7.78       | 3H4    | 0.00  | 8.19       |        |       |            | 3E     | 0.00  | 8.19       |
| OH5    | 0.00  | 7.24       | 4H3    | 0.00  | 7.54       | 3E     | 0.00  | 8.19       | 3E     | 0.00  | 8.19       | 5S1    | -     | -          | 3H2    | 0.00  | 8.19       |
| 4H5    | 0.00  | 8.19       | 25B    | 0.00  | 7.78       | 3H2    | 0.00  | 8.19       |        |       |            | B14    | -     | -          |        |       |            |
| 3E     | 0.00  | 8.19       | 5HO    | 0.00  | 7.78       |        |       |            | 5S1    | -     | -          | 14B    | -     | -          | 5S1    | -     | -          |
|        |       |            | 3E     | 0.00  | 8.19       | 5S1    | -     | -          | B14    | -     | -          | 1S3    | -     | -          | B14    | -     | -          |
| 4E     | -     | -          |        |       |            | B14    | -     | -          | 3S1    | -     | -          | 3S1    | -     | -          | 1S5    | -     | -          |
| 4H3    | -     | -          | B14    | -     | -          | 25B    | -     | -          | 25B    | -     | -          | 4E     | -     | -          | 3S1    | -     | -          |
| 1H2    | -     | -          | 1H2    | -     | -          | 4E     | -     | -          | 1H2    | -     | -          | 1H2    | -     | -          | 4E     | -     | -          |
| 1E     | -     | -          | 1E     | -     | -          | 1H2    | -     | -          | 1E     | -     | -          | 1E     | -     | -          | 1H2    | -     | -          |
| EO     | -     | -          | EO     | -     | -          | 1E     | -     | -          | EO     | -     | -          | 3H4    | -     | -          | 1E     | -     | -          |
| 1HO    | -     | -          | 1HO    | -     | -          | EO     | -     | -          | 1HO    | -     | -          | EO     | -     | -          | EO     | -     | -          |
| 3H2    | -     | -          | 3H2    | -     | -          | 1HO    | -     | -          | 3H2    | -     | -          | 1HO    | -     | -          | 1HO    | -     | -          |
| E2     | -     | -          |

Table S21. Pyranose pucker populations (%) and relative free energies ( $\Delta G$ , kcal mol<sup>-1</sup>) from a 10  $\mu$ s simulation of **3** (strand A, numbered from reducing end)

| Glc:7  |       |            | Glc:8  |       |            | Glc:9  |       |            | Glc:10 |       |            | Glc:11 |       |            | Glc:12 |       |            |
|--------|-------|------------|--------|-------|------------|--------|-------|------------|--------|-------|------------|--------|-------|------------|--------|-------|------------|
| Pucker | %     | $\Delta G$ |
| 4C1    | 96.94 | 0.02       | 4C1    | 95.72 | 0.03       | 4C1    | 98.33 | 0.01       | 4C1    | 98.42 | 0.01       | 4C1    | 99.15 | 0.01       | 4C1    | 96.76 | 0.02       |
| OS2    | 1.87  | 2.36       | 1C4    | 2.17  | 2.27       | OS2    | 0.82  | 2.85       | 1C4    | 0.76  | 2.89       | OS2    | 0.44  | 3.22       | 1C4    | 2.86  | 2.11       |
| 1C4    | 1.05  | 2.70       | OS2    | 1.81  | 2.38       | 1C4    | 0.76  | 2.90       | OS2    | 0.70  | 2.94       | 1C4    | 0.15  | 3.85       | OS2    | 0.15  | 3.84       |
| B25    | 0.08  | 4.23       | 3OB    | 0.22  | 3.62       | B25    | 0.02  | 4.93       | B25    | 0.04  | 4.63       | B25    | 0.09  | 4.15       | 1S3    | 0.07  | 4.34       |
| OH5    | 0.02  | 5.21       | B25    | 0.04  | 4.69       | 3OB    | 0.01  | 5.26       | B3O    | 0.02  | 5.19       | B3O    | 0.05  | 4.56       | B3O    | 0.05  | 4.46       |
| 2SO    | 0.01  | 5.35       | OH5    | 0.01  | 5.26       | OH5    | 0.01  | 5.31       | OH5    | 0.01  | 5.28       | 1S3    | 0.04  | 4.62       | B25    | 0.03  | 4.79       |
| B3O    | 0.01  | 5.36       | 2SO    | 0.01  | 5.67       | 2SO    | 0.01  | 5.41       | 3OB    | 0.01  | 5.47       | 2SO    | 0.01  | 5.23       | 3OB    | 0.01  | 5.35       |
| 3OB    | 0.01  | 5.45       | B3O    | 0.00  | 5.99       | B3O    | 0.01  | 5.59       | 2SO    | 0.01  | 5.61       | OH5    | 0.01  | 5.34       | 2SO    | 0.01  | 5.40       |
| E5     | 0.00  | 5.96       | E5     | 0.00  | 6.10       | 2H1    | 0.00  | 6.05       | 1S3    | 0.01  | 5.68       | 3OB    | 0.01  | 5.38       | 1S5    | 0.01  | 5.47       |
| OE     | 0.00  | 6.36       | OE     | 0.00  | 6.28       | E5     | 0.00  | 6.12       | 2H1    | 0.00  | 5.94       | 1S5    | 0.01  | 5.39       | 14B    | 0.01  | 5.62       |
| E3     | 0.00  | 6.55       | 5E     | 0.00  | 6.45       | OE     | 0.00  | 6.28       | E5     | 0.00  | 5.99       | 2H1    | 0.01  | 5.84       | 2H1    | 0.01  | 5.84       |
| 5E     | 0.00  | 6.59       | E3     | 0.00  | 6.51       | E1     | 0.00  | 6.36       | 1S5    | 0.00  | 6.02       | E5     | 0.01  | 5.87       | E5     | 0.01  | 5.86       |
| 5H4    | 0.00  | 6.67       | 1S5    | 0.00  | 6.55       | 2H3    | 0.00  | 6.51       | E1     | 0.00  | 6.28       | 2H3    | 0.00  | 6.20       | 2E     | 0.00  | 6.01       |
| 5HO    | 0.00  | 6.77       | 5H4    | 0.00  | 6.63       | 5H4    | 0.00  | 6.59       | 5H4    | 0.00  | 6.42       | E1     | 0.00  | 6.24       | OH5    | 0.00  | 6.12       |
| E1     | 0.00  | 7.24       | E1     | 0.00  | 6.96       | 2E     | 0.00  | 6.72       | OE     | 0.00  | 6.45       | 2E     | 0.00  | 6.28       | 2H3    | 0.00  | 6.24       |
| 2H1    | 0.00  | 7.37       | 2H3    | 0.00  | 7.13       | 5E     | 0.00  | 6.77       | E3     | 0.00  | 6.48       | E3     | 0.00  | 6.42       | E1     | 0.00  | 6.42       |
| 2H3    | 0.00  | 7.37       | 5HO    | 0.00  | 7.13       | E3     | 0.00  | 6.83       | 2E     | 0.00  | 6.48       | OE     | 0.00  | 6.59       | 3S1    | 0.00  | 6.48       |
| E4     | 0.00  | 7.37       | E4     | 0.00  | 7.37       | 1S3    | 0.00  | 7.24       | 5E     | 0.00  | 6.51       | 5H4    | 0.00  | 6.63       | E3     | 0.00  | 6.51       |
| 4H5    | 0.00  | 7.54       | 4H3    | 0.00  | 7.54       | E4     | 0.00  | 7.24       | 2H3    | 0.00  | 7.04       | 14B    | 0.00  | 6.77       | 5H4    | 0.00  | 6.55       |
| OH1    | 0.00  | 7.54       | 2H1    | 0.00  | 7.78       | 1S5    | 0.00  | 7.37       | OH1    | 0.00  | 7.13       | 4H5    | 0.00  | 6.83       | OE     | 0.00  | 6.72       |
| 2E     | 0.00  | 7.78       | 4H5    | 0.00  | 7.78       | OH1    | 0.00  | 7.37       | 5HO    | 0.00  | 7.13       | 5E     | 0.00  | 6.83       | 4H5    | 0.00  | 6.77       |
| 4E     | 0.00  | 8.19       | 3H4    | 0.00  | 7.78       | 4H5    | 0.00  | 7.78       | E4     | 0.00  | 7.13       | 3S1    | 0.00  | 6.96       | 5S1    | 0.00  | 6.89       |
| 4H3    | 0.00  | 8.19       | 14B    | 0.00  | 8.19       | 5HO    | 0.00  | 7.78       | 14B    | 0.00  | 7.54       | E4     | 0.00  | 6.96       | E4     | 0.00  | 6.96       |
| 3E     | 0.00  | 8.19       | 3S1    | 0.00  | 8.19       | 5S1    | 0.00  | 8.19       | 3H4    | 0.00  | 7.78       | 4H3    | 0.00  | 7.04       | OH1    | 0.00  | 7.04       |
|        |       |            | 4E     | 0.00  | 8.19       | 25B    | 0.00  | 8.19       | 4H5    | 0.00  | 8.19       | OH1    | 0.00  | 7.13       | 5E     | 0.00  | 7.13       |
|        |       |            | OH1    | 0.00  | 8.19       | 4E     | 0.00  | 8.19       | 4H3    | 0.00  | 8.19       | 5HO    | 0.00  | 7.13       | 4E     | 0.00  | 7.54       |
|        |       |            | 2E     | 0.00  | 8.19       | 4H3    | 0.00  | 8.19       | EO     | 0.00  | 8.19       | 4E     | 0.00  | 7.24       | 5HO    | 0.00  | 7.54       |
|        |       |            |        |       |            | EO     | 0.00  | 8.19       |        |       |            | 25B    | 0.00  | 7.54       | B14    | 0.00  | 7.78       |
| 5S1    | -     | -          |        |       |            |        |       |            | 5S1    | -     | -          |        |       |            | 4H3    | 0.00  | 7.78       |
| B14    | -     | -          | 5S1    | -     | -          |        |       |            | B14    | -     | -          | 5S1    | -     | -          | 3H4    | 0.00  | 8.19       |
| 1S5    | -     | -          | B14    | -     | -          | 3E     | 0.00  | 8.19       |
| 14B    | -     | -          | 1S3    | -     | -          | 14B    | -     | -          | 3S1    | -     | -          | 1H2    | -     | -          | 3H2    | 0.00  | 8.19       |
| 1S3    | -     | -          | 25B    | -     | -          | 3S1    | -     | -          | 25B    | -     | -          | 1H2    | -     | -          |        |       |            |
| 3S1    | -     | -          | 1H2    | -     | -          | 1H2    | -     | -          | 4E     | -     | -          | 1E     | -     | -          |        |       |            |
| 25B    | -     | -          | 1E     | -     | -          | 1E     | -     | -          | 1H2    | -     | -          | 3H4    | -     | -          | 25B    | -     | -          |
| 1H2    | -     | -          | EO     | -     | -          | 3H4    | -     | -          | 1E     | -     | -          | EO     | -     | -          | 1H2    | -     | -          |
| 1E     | -     | -          | 3E     | -     | -          | 1E     | -     | -          |
| 3H4    | -     | -          | 1HO    | -     | -          | EO     | -     | -          |
| EO     | -     | -          | 3H2    | -     | -          | 1HO    | -     | -          |
| 1HO    | -     | -          | E2     | -     | -          |
| 3H2    | -     | -          |        |       |            |        |       |            |        |       |            |        |       |            |        |       |            |
| E2     | -     | -          |        |       |            |        |       |            |        |       |            |        |       |            |        |       |            |

S21 continued

Table S21. Pyranose pucker populations (%) and relative free energies ( $\Delta G$ , kcal mol<sup>-1</sup>) from a 10  $\mu$ s simulation of **3** (strand B, numbered from reducing end)

| Glc:1  |       |            | Glc:2  |       |            | Glc:3  |       |            | Glc:4  |       |            | Glc:5  |       |            | Glc:6  |       |            |
|--------|-------|------------|--------|-------|------------|--------|-------|------------|--------|-------|------------|--------|-------|------------|--------|-------|------------|
| Pucker | %     | $\Delta G$ |
| 4C1    | 94.71 | 0.03       | 4C1    | 98.19 | 0.01       | 4C1    | 99.28 | 0.00       | 4C1    | 98.37 | 0.01       | 4C1    | 99.37 | 0.00       | 4C1    | 98.02 | 0.01       |
| 1C4    | 4.57  | 1.83       | OS2    | 1.21  | 2.62       | OS2    | 0.56  | 3.08       | OS2    | 1.03  | 2.71       | 1C4    | 0.32  | 3.40       | 1C4    | 1.46  | 2.51       |
| 1S5    | 0.21  | 3.65       | 1C4    | 0.31  | 3.42       | B25    | 0.06  | 4.42       | 1C4    | 0.49  | 3.16       | OS2    | 0.27  | 3.51       | OS2    | 0.46  | 3.19       |
| B25    | 0.19  | 3.72       | B25    | 0.11  | 4.03       | 1C4    | 0.03  | 4.72       | B25    | 0.03  | 4.91       | OH5    | 0.01  | 5.23       | B25    | 0.02  | 5.16       |
| OS2    | 0.09  | 4.16       | 1S3    | 0.06  | 4.45       | B30    | 0.06  | 5.07       | B30    | 0.02  | 4.98       | B25    | 0.01  | 5.73       | OH5    | 0.01  | 5.35       |
| 5H4    | 0.06  | 4.37       | B30    | 0.04  | 4.62       | 2S0    | 0.02  | 5.19       | 3OB    | 0.02  | 5.01       | 2S0    | 0.00  | 5.88       | 2S0    | 0.01  | 5.59       |
| 2H1    | 0.03  | 4.89       | 1S5    | 0.01  | 5.23       | OH5    | 0.01  | 5.60       | OH5    | 0.01  | 5.39       | B30    | 0.00  | 6.04       | 3OB    | 0.00  | 5.96       |
| 14B    | 0.03  | 4.92       | 3OB    | 0.01  | 5.54       | 3OB    | 0.01  | 5.85       | 2S0    | 0.01  | 5.41       | 3OB    | 0.00  | 6.18       | E5     | 0.00  | 6.12       |
| E4     | 0.02  | 5.05       | E5     | 0.01  | 5.69       | E5     | 0.00  | 6.07       | E5     | 0.00  | 6.08       | E5     | 0.00  | 6.18       | B30    | 0.00  | 6.20       |
| 5E     | 0.02  | 5.06       | 14B    | 0.01  | 5.75       | OE     | 0.00  | 6.31       | OE     | 0.00  | 6.36       | E3     | 0.00  | 6.42       | OE     | 0.00  | 6.33       |
| 1S3    | 0.02  | 5.07       | OH5    | 0.01  | 5.76       | 1S5    | 0.00  | 6.33       | 5H4    | 0.00  | 6.45       | OE     | 0.00  | 6.55       | 5H4    | 0.00  | 6.48       |
| E1     | 0.02  | 5.09       | 2H1    | 0.00  | 5.99       | E3     | 0.00  | 6.45       | E3     | 0.00  | 6.77       | 2H3    | 0.00  | 6.72       | E3     | 0.00  | 6.55       |
| 2E     | 0.01  | 5.46       | 2S0    | 0.00  | 6.01       | 2H3    | 0.00  | 6.67       | 1S3    | 0.00  | 6.83       | 2E     | 0.00  | 7.24       | 5E     | 0.00  | 6.63       |
| B30    | 0.01  | 5.75       | 3S1    | 0.00  | 6.02       | 4H5    | 0.00  | 6.83       | 5E     | 0.00  | 6.83       | 5E     | 0.00  | 7.37       | 2H3    | 0.00  | 6.72       |
| 5S1    | 0.01  | 5.84       | 5S1    | 0.00  | 6.05       | 1S3    | 0.00  | 7.13       | 2H3    | 0.00  | 6.89       | 4H3    | 0.00  | 7.54       | 5HO    | 0.00  | 7.37       |
| 2H3    | 0.00  | 6.08       | 5H4    | 0.00  | 6.28       | 4H3    | 0.00  | 7.13       | 2E     | 0.00  | 7.13       | 5H4    | 0.00  | 7.78       | 2H1    | 0.00  | 7.54       |
| OH1    | 0.00  | 6.14       | E1     | 0.00  | 6.31       | 5H4    | 0.00  | 7.13       | E4     | 0.00  | 7.13       | 2H1    | 0.00  | 8.19       | E1     | 0.00  | 7.54       |
| 2S0    | 0.00  | 6.20       | E4     | 0.00  | 6.33       | 2H1    | 0.00  | 7.37       | 5HO    | 0.00  | 7.37       | OH1    | 0.00  | 8.19       | 4H5    | 0.00  | 7.54       |
| 3OB    | 0.00  | 6.45       | 4H5    | 0.00  | 6.36       | OH1    | 0.00  | 7.37       | 3H4    | 0.00  | 7.54       | 3H4    | 0.00  | 8.19       | OH1    | 0.00  | 7.54       |
| 5HO    | 0.00  | 6.63       | OE     | 0.00  | 6.36       | 5E     | 0.00  | 7.37       | 2H1    | 0.00  | 7.78       |        |       |            | 2E     | 0.00  | 7.78       |
| 3H4    | 0.00  | 6.67       | 2E     | 0.00  | 6.55       | E1     | 0.00  | 7.54       | 4H3    | 0.00  | 7.78       | 5S1    | -     | -          | E4     | 0.00  | 7.78       |
| 3S1    | 0.00  | 6.89       | 5E     | 0.00  | 6.55       | 4E     | 0.00  | 8.19       | OH1    | 0.00  | 8.19       | B14    | -     | -          | 4E     | 0.00  | 8.19       |
| 25B    | 0.00  | 7.24       | B14    | 0.00  | 6.77       | 2E     | 0.00  | 8.19       | 3E     | 0.00  | 8.19       | 1S5    | -     | -          | 4H3    | 0.00  | 8.19       |
| OH5    | 0.00  | 7.24       | OH1    | 0.00  | 6.96       | 5HO    | 0.00  | 8.19       |        |       |            | 14B    | -     | -          | EO     | 0.00  | 8.19       |
| E5     | 0.00  | 7.24       | E3     | 0.00  | 7.24       | E4     | 0.00  | 8.19       | 5S1    | -     | -          | 1S3    | -     | -          | 3E     | 0.00  | 8.19       |
| B14    | 0.00  | 7.37       | 2H3    | 0.00  | 7.24       |        |       |            | B14    | -     | -          | 3S1    | -     | -          |        |       |            |
| 4H5    | 0.00  | 7.37       | 4E     | 0.00  | 7.78       | 5S1    | -     | -          | 1S5    | -     | -          | 25B    | -     | -          | 5S1    | -     | -          |
| E3     | 0.00  | 7.37       | 5HO    | 0.00  | 7.78       | B14    | -     | -          | 14B    | -     | -          | E1     | -     | -          | B14    | -     | -          |
| OE     | 0.00  | 7.78       | 25B    | 0.00  | 8.19       | 14B    | -     | -          | 3S1    | -     | -          | 4H5    | -     | -          | 1S5    | -     | -          |
| 3E     | 0.00  | 7.78       | 3H4    | 0.00  | 8.19       | 3S1    | -     | -          | 25B    | -     | -          | 4E     | -     | -          | 14B    | -     | -          |
|        |       |            |        |       |            | 25B    | -     | -          | E1     | -     | -          | 1H2    | -     | -          | 1S3    | -     | -          |
| 4E     | -     | -          | 4H3    | -     | -          | 1H2    | -     | -          | 4H5    | -     | -          | 1E     | -     | -          | 3S1    | -     | -          |
| 4H3    | -     | -          | 1H2    | -     | -          | 1E     | -     | -          | 4E     | -     | -          | 5HO    | -     | -          | 25B    | -     | -          |
| 1H2    | -     | -          | 1E     | -     | -          | 3H4    | -     | -          | 1H2    | -     | -          | E4     | -     | -          | 1H2    | -     | -          |
| 1E     | -     | -          | EO     | -     | -          | EO     | -     | -          | 1E     | -     | -          | EO     | -     | -          | 1E     | -     | -          |
| EO     | -     | -          | 3E     | -     | -          | 3E     | -     | -          | EO     | -     | -          | 3E     | -     | -          | 3H4    | -     | -          |
| 1HO    | -     | -          |
| 3H2    | -     | -          |
| E2     | -     | -          |

S21 continued

Table S21. Pyranose pucker populations (%) and relative free energies ( $\Delta G$ , kcal mol<sup>-1</sup>) from a 10  $\mu$ s simulation of **3** (strand B, numbered from reducing end)

| Glc:7  |       |            | Glc:8  |       |            | Glc:9  |       |            | Glc:10 |       |            | Glc:11 |       |            | Glc:12 |       |            |
|--------|-------|------------|--------|-------|------------|--------|-------|------------|--------|-------|------------|--------|-------|------------|--------|-------|------------|
| Pucker | %     | $\Delta G$ |
| 4C1    | 96.83 | 0.02       | 4C1    | 98.99 | 0.01       | 4C1    | 96.50 | 0.02       | 4C1    | 98.47 | 0.01       | 4C1    | 97.64 | 0.01       | 4C1    | 95.04 | 0.03       |
| OS2    | 1.52  | 2.48       | OS2    | 0.53  | 3.10       | OS2    | 2.30  | 2.24       | 1C4    | 0.68  | 2.96       | OS2    | 1.29  | 2.58       | 1C4    | 4.38  | 1.86       |
| 1C4    | 1.35  | 2.55       | 1C4    | 0.41  | 3.26       | 1C4    | 0.98  | 2.74       | OS2    | 0.64  | 2.99       | 1C4    | 0.73  | 2.92       | OS2    | 0.24  | 3.58       |
| 3OB    | 0.18  | 3.75       | 2SO    | 0.01  | 5.27       | B25    | 0.11  | 4.02       | B25    | 0.08  | 4.21       | B25    | 0.15  | 3.87       | 1S3    | 0.11  | 4.04       |
| B25    | 0.04  | 4.60       | OH5    | 0.01  | 5.27       | 3OB    | 0.07  | 4.34       | B3O    | 0.04  | 4.70       | 1S3    | 0.06  | 4.44       | B3O    | 0.07  | 4.33       |
| B3O    | 0.02  | 4.96       | B25    | 0.01  | 5.37       | OH5    | 0.01  | 5.29       | 1S3    | 0.02  | 5.17       | B3O    | 0.04  | 4.67       | B25    | 0.05  | 4.50       |
| 2SO    | 0.02  | 5.03       | 3OB    | 0.01  | 5.68       | 2SO    | 0.00  | 5.90       | 2SO    | 0.01  | 5.25       | 1S5    | 0.03  | 4.79       | 1S5    | 0.02  | 4.98       |
| OH5    | 0.01  | 5.32       | B3O    | 0.01  | 5.77       | E5     | 0.00  | 5.96       | OH5    | 0.01  | 5.28       | 3OB    | 0.01  | 5.25       | 3OB    | 0.02  | 5.09       |
| 3S1    | 0.01  | 5.76       | E5     | 0.00  | 6.01       | B3O    | 0.00  | 6.02       | 2H1    | 0.01  | 5.77       | OH5    | 0.01  | 5.46       | 14B    | 0.01  | 5.28       |
| 2H1    | 0.00  | 6.04       | 2H3    | 0.00  | 6.48       | 2H1    | 0.00  | 6.36       | 3OB    | 0.01  | 5.86       | 2SO    | 0.01  | 5.60       | 2SO    | 0.01  | 5.30       |
| E5     | 0.00  | 6.33       | OE     | 0.00  | 6.63       | OE     | 0.00  | 6.42       | 5H4    | 0.00  | 5.88       | 2H1    | 0.01  | 5.61       | 2H1    | 0.01  | 5.49       |
| E3     | 0.00  | 6.51       | E3     | 0.00  | 6.67       | 2E     | 0.00  | 6.48       | E1     | 0.00  | 5.96       | E5     | 0.01  | 5.64       | 2E     | 0.01  | 5.58       |
| 5E     | 0.00  | 6.51       | 2H1    | 0.00  | 6.96       | 5E     | 0.00  | 6.48       | E5     | 0.00  | 6.01       | 14B    | 0.01  | 5.85       | 2H3    | 0.00  | 5.88       |
| E1     | 0.00  | 6.55       | E1     | 0.00  | 6.96       | 5H4    | 0.00  | 6.67       | 1S5    | 0.00  | 6.16       | 5H4    | 0.00  | 6.12       | E1     | 0.00  | 6.08       |
| OE     | 0.00  | 6.59       | 5E     | 0.00  | 7.13       | E3     | 0.00  | 6.72       | 5E     | 0.00  | 6.22       | 2E     | 0.00  | 6.14       | E5     | 0.00  | 6.16       |
| 2E     | 0.00  | 6.72       | 2E     | 0.00  | 7.24       | 5HO    | 0.00  | 6.77       | E3     | 0.00  | 6.28       | E1     | 0.00  | 6.20       | 3S1    | 0.00  | 6.26       |
| 5H4    | 0.00  | 6.72       | OH1    | 0.00  | 7.37       | E1     | 0.00  | 6.89       | 2E     | 0.00  | 6.39       | 5E     | 0.00  | 6.45       | OH5    | 0.00  | 6.28       |
| 1S5    | 0.00  | 6.83       | 4H3    | 0.00  | 7.54       | E4     | 0.00  | 6.96       | OE     | 0.00  | 6.51       | 4H5    | 0.00  | 6.55       | OH1    | 0.00  | 6.59       |
| 5HO    | 0.00  | 6.96       | 5HO    | 0.00  | 7.54       | 4H5    | 0.00  | 7.13       | 2H3    | 0.00  | 6.51       | OE     | 0.00  | 6.55       | 5E     | 0.00  | 6.67       |
| OH1    | 0.00  | 7.24       | 5H4    | 0.00  | 7.78       | OH1    | 0.00  | 7.13       | 5S1    | 0.00  | 6.67       | E3     | 0.00  | 6.77       | 4H5    | 0.00  | 6.72       |
| 2H3    | 0.00  | 7.37       | 4E     | 0.00  | 8.19       | 4H3    | 0.00  | 7.37       | E4     | 0.00  | 6.77       | 2H3    | 0.00  | 6.77       | E3     | 0.00  | 6.72       |
| 4H5    | 0.00  | 7.54       |        |       |            | 2H3    | 0.00  | 7.54       | 4H5    | 0.00  | 7.04       | OH1    | 0.00  | 6.83       | 5S1    | 0.00  | 6.83       |
| E4     | 0.00  | 7.78       | 5S1    | -     | -          | 1S5    | 0.00  | 7.78       | 5HO    | 0.00  | 7.04       | E4     | 0.00  | 6.89       | 5H4    | 0.00  | 6.83       |
| 5S1    | 0.00  | 8.19       | B14    | -     | -          | 3H4    | 0.00  | 8.19       | B14    | 0.00  | 7.37       | 5HO    | 0.00  | 6.96       | E4     | 0.00  | 6.83       |
| 14B    | 0.00  | 8.19       | 1S5    | -     | -          |        |       |            | OH1    | 0.00  | 7.37       | 4H3    | 0.00  | 7.04       | OE     | 0.00  | 6.96       |
| 1S3    | 0.00  | 8.19       | 14B    | -     | -          | 5S1    | -     | -          | 4E     | 0.00  | 7.54       | 4E     | 0.00  | 7.37       | 5HO    | 0.00  | 7.04       |
| 4H3    | 0.00  | 8.19       | 1S3    | -     | -          | B14    | -     | -          | 3H4    | 0.00  | 7.78       | 25B    | 0.00  | 7.78       | 25B    | 0.00  | 7.54       |
| 3H4    | 0.00  | 8.19       | 3S1    | -     | -          | 14B    | -     | -          | 3S1    | 0.00  | 8.19       | 3H4    | 0.00  | 7.78       | 3H4    | 0.00  | 7.54       |
|        |       |            | 25B    | -     | -          | 1S3    | -     | -          | 25B    | 0.00  | 8.19       | 3S1    | 0.00  | 8.19       | B14    | 0.00  | 7.78       |
| B14    | -     | -          | 4H5    | -     | -          | 3S1    | -     | -          | 4H3    | 0.00  | 8.19       | 3E     | 0.00  | 8.19       | 4E     | 0.00  | 7.78       |
| 25B    | -     | -          | 1H2    | -     | -          | 25B    | -     | -          |        |       |            |        |       |            | 4H3    | 0.00  | 7.78       |
| 4E     | -     | -          | 1E     | -     | -          | 4E     | -     | -          | 14B    | -     | -          | 5S1    | -     | -          |        |       |            |
| 1H2    | -     | -          | E4     | -     | -          | 1H2    | -     | -          | 1H2    | -     | -          | B14    | -     | -          | 1H2    | -     | -          |
| 1E     | -     | -          | 3H4    | -     | -          | 1E     | -     | -          | 1E     | -     | -          | 1H2    | -     | -          | 1E     | -     | -          |
| EO     | -     | -          | 1E     | -     | -          | EO     | -     | -          |
| 3E     | -     | -          | EO     | -     | -          | 3E     | -     | -          |
| 1HO    | -     | -          |
| 3H2    | -     | -          |
| E2     | -     | -          |

S21 continued

Table S22. Pyranose pucker populations (%) and relative free energies ( $\Delta G$ , kcal mol<sup>-1</sup>) from a 10  $\mu$ s simulations of **4** (from reducing end)

| (4)<br>Glc:1 |       |            | (4)<br>Glc:2 |       |            | (4)<br>Glc:3 |       |            | (4)<br>Glc:4 |       |            | (4)<br>Glc:5 |       |            | (4)<br>Glc:6 |       |            |
|--------------|-------|------------|--------------|-------|------------|--------------|-------|------------|--------------|-------|------------|--------------|-------|------------|--------------|-------|------------|
| Pucker       | %     | $\Delta G$ |
| <b>4C1</b>   | 93.59 | 0.04       | <b>4C1</b>   | 97.28 | 0.02       | <b>4C1</b>   | 91.25 | 0.05       | <b>4C1</b>   | 97.38 | 0.02       | <b>4C1</b>   | 97.60 | 0.01       | <b>4C1</b>   | 99.30 | 0.00       |
| <b>1C4</b>   | 5.56  | 1.71       | <b>1C4</b>   | 1.51  | 2.49       | <b>OS2</b>   | 5.18  | 1.76       | <b>OS2</b>   | 1.46  | 2.50       | <b>OS2</b>   | 1.72  | 2.41       | <b>OS2</b>   | 0.49  | 3.16       |
| <b>1S5</b>   | 0.26  | 3.54       | <b>OS2</b>   | 0.74  | 2.91       | <b>1C4</b>   | 1.56  | 2.47       | <b>1C4</b>   | 0.83  | 2.84       | <b>1C4</b>   | 0.26  | 3.53       | <b>1S3</b>   | 0.04  | 4.60       |
| <b>B25</b>   | 0.24  | 3.57       | <b>3OB</b>   | 0.19  | 3.71       | <b>3OB</b>   | 1.24  | 2.60       | <b>3OB</b>   | 0.13  | 3.94       | <b>B25</b>   | 0.16  | 3.82       | <b>3OB</b>   | 0.04  | 4.64       |
| <b>OS2</b>   | 0.15  | 3.86       | <b>B3O</b>   | 0.06  | 4.45       | <b>B25</b>   | 0.41  | 3.27       | <b>3OB</b>   | 0.10  | 4.11       | <b>3OB</b>   | 0.15  | 3.86       | <b>B25</b>   | 0.03  | 4.74       |
| <b>5H4</b>   | 0.07  | 4.35       | <b>1S3</b>   | 0.05  | 4.50       | <b>1S3</b>   | 0.17  | 3.78       | <b>1S5</b>   | 0.03  | 4.78       | <b>2H1</b>   | 0.03  | 4.75       | <b>B3O</b>   | 0.02  | 4.96       |
| <b>14B</b>   | 0.03  | 4.89       | <b>B25</b>   | 0.05  | 4.50       | <b>B3O</b>   | 0.06  | 4.40       | <b>E5</b>    | 0.02  | 5.14       | <b>E5</b>    | 0.02  | 5.19       | <b>2H1</b>   | 0.01  | 5.46       |
| <b>5E</b>    | 0.02  | 4.95       | <b>3S1</b>   | 0.02  | 5.02       | <b>1S5</b>   | 0.03  | 4.73       | <b>OH5</b>   | 0.01  | 5.37       | <b>E1</b>    | 0.02  | 5.19       | <b>E5</b>    | 0.01  | 5.49       |
| <b>1S3</b>   | 0.02  | 5.08       | <b>E5</b>    | 0.02  | 5.03       | <b>E5</b>    | 0.02  | 5.02       | <b>2H1</b>   | 0.01  | 5.66       | <b>OH5</b>   | 0.01  | 5.44       | <b>3S1</b>   | 0.01  | 5.73       |
| <b>2H1</b>   | 0.02  | 5.18       | <b>E1</b>    | 0.01  | 5.32       | <b>14B</b>   | 0.01  | 5.25       | <b>4H5</b>   | 0.01  | 5.73       | <b>2E</b>    | 0.01  | 5.51       | <b>2SO</b>   | 0.01  | 5.74       |
| <b>E4</b>    | 0.02  | 5.19       | <b>2H1</b>   | 0.01  | 5.34       | <b>OH5</b>   | 0.01  | 5.35       | <b>E1</b>    | 0.00  | 5.96       | <b>1S5</b>   | 0.00  | 5.88       | <b>2E</b>    | 0.01  | 5.76       |
| <b>E1</b>    | 0.01  | 5.32       | <b>OH5</b>   | 0.01  | 5.42       | <b>5H4</b>   | 0.01  | 5.56       | <b>2E</b>    | 0.00  | 6.12       | <b>4H5</b>   | 0.00  | 5.88       | <b>1S5</b>   | 0.01  | 5.82       |
| <b>2E</b>    | 0.01  | 5.73       | <b>1S5</b>   | 0.01  | 5.49       | <b>2H1</b>   | 0.01  | 5.68       | <b>14B</b>   | 0.00  | 6.24       | <b>2H3</b>   | 0.00  | 6.36       | <b>OH5</b>   | 0.01  | 5.86       |
| <b>B3O</b>   | 0.00  | 5.99       | <b>4H5</b>   | 0.01  | 5.53       | <b>4H5</b>   | 0.01  | 5.75       | <b>5H4</b>   | 0.00  | 6.33       | <b>OH1</b>   | 0.00  | 6.45       | <b>14B</b>   | 0.01  | 5.87       |
| <b>2SO</b>   | 0.00  | 6.42       | <b>2SO</b>   | 0.01  | 5.56       | <b>E1</b>    | 0.00  | 5.88       | <b>2H3</b>   | 0.00  | 6.42       | <b>3S1</b>   | 0.00  | 6.67       | <b>E1</b>    | 0.00  | 5.92       |
| <b>E5</b>    | 0.00  | 6.63       | <b>2E</b>    | 0.01  | 5.78       | <b>2E</b>    | 0.00  | 5.90       | <b>OE</b>    | 0.00  | 6.77       | <b>4E</b>    | 0.00  | 6.67       | <b>5S1</b>   | 0.00  | 5.98       |
| <b>OH1</b>   | 0.00  | 6.63       | <b>14B</b>   | 0.00  | 6.26       | <b>E4</b>    | 0.00  | 6.16       | <b>5E</b>    | 0.00  | 6.77       | <b>OE</b>    | 0.00  | 6.67       | <b>4H5</b>   | 0.00  | 5.99       |
| <b>2H3</b>   | 0.00  | 6.63       | <b>OE</b>    | 0.00  | 6.36       | <b>5E</b>    | 0.00  | 6.26       | <b>OH1</b>   | 0.00  | 6.83       | <b>5S1</b>   | 0.00  | 6.72       | <b>2H3</b>   | 0.00  | 6.36       |
| <b>OH5</b>   | 0.00  | 6.72       | <b>5H4</b>   | 0.00  | 6.39       | <b>2H3</b>   | 0.00  | 6.36       | <b>E4</b>    | 0.00  | 6.83       | <b>5E</b>    | 0.00  | 6.77       | <b>OH1</b>   | 0.00  | 6.59       |
| <b>5HO</b>   | 0.00  | 6.83       | <b>4E</b>    | 0.00  | 6.45       | <b>2SO</b>   | 0.00  | 6.48       | <b>4E</b>    | 0.00  | 6.89       | <b>25B</b>   | 0.00  | 6.89       | <b>OE</b>    | 0.00  | 6.63       |
| <b>E3</b>    | 0.00  | 6.96       | <b>2H3</b>   | 0.00  | 6.67       | <b>4E</b>    | 0.00  | 6.55       | <b>1S3</b>   | 0.00  | 7.13       | <b>5H4</b>   | 0.00  | 6.96       | <b>B14</b>   | 0.00  | 6.89       |
| <b>OE</b>    | 0.00  | 7.04       | <b>OH1</b>   | 0.00  | 6.77       | <b>OE</b>    | 0.00  | 6.59       | <b>5HO</b>   | 0.00  | 7.13       | <b>2SO</b>   | 0.00  | 7.13       | <b>25B</b>   | 0.00  | 6.89       |
| <b>5S1</b>   | 0.00  | 7.13       | <b>E4</b>    | 0.00  | 6.83       | <b>5HO</b>   | 0.00  | 6.96       | <b>4H3</b>   | 0.00  | 7.37       | <b>E3</b>    | 0.00  | 7.13       | <b>E3</b>    | 0.00  | 6.96       |
| <b>3H4</b>   | 0.00  | 7.13       | <b>E3</b>    | 0.00  | 7.24       | <b>3S1</b>   | 0.00  | 7.04       | <b>E3</b>    | 0.00  | 7.37       | <b>5HO</b>   | 0.00  | 7.13       | <b>4E</b>    | 0.00  | 7.04       |
| <b>4H5</b>   | 0.00  | 7.37       | <b>4H3</b>   | 0.00  | 7.54       | <b>25B</b>   | 0.00  | 7.04       | <b>3E</b>    | 0.00  | 8.19       | <b>E4</b>    | 0.00  | 7.78       | <b>4H3</b>   | 0.00  | 7.54       |
| <b>4H3</b>   | 0.00  | 7.37       | <b>5E</b>    | 0.00  | 7.54       | <b>E3</b>    | 0.00  | 7.13       |              |       |            | <b>4H3</b>   | 0.00  | 8.19       | <b>5E</b>    | 0.00  | 8.19       |
| <b>3OB</b>   | 0.00  | 7.54       | <b>5S1</b>   | 0.00  | 7.78       | <b>OH1</b>   | 0.00  | 7.13       | <b>5S1</b>   | -     | -          | <b>EO</b>    | 0.00  | 8.19       | <b>3E</b>    | 0.00  | 8.19       |
| <b>25B</b>   | 0.00  | 7.78       | <b>B14</b>   | 0.00  | 8.19       | <b>3H4</b>   | 0.00  | 7.54       | <b>B14</b>   | -     | -          |              |       |            | <b>3H2</b>   | 0.00  | 8.19       |
| <b>3E</b>    | 0.00  | 8.19       | <b>5HO</b>   | 0.00  | 8.19       | <b>EO</b>    | 0.00  | 7.78       | <b>B3O</b>   | -     | -          | <b>B14</b>   | -     | -          |              |       |            |
|              |       |            | <b>3H4</b>   | 0.00  | 8.19       | <b>3E</b>    | 0.00  | 8.19       | <b>3S1</b>   | -     | -          | <b>14B</b>   | -     | -          | <b>1C4</b>   | -     | -          |
| <b>B14</b>   | -     | -          | <b>EO</b>    | 0.00  | 8.19       |              |       |            | <b>2SO</b>   | -     | -          | <b>1S3</b>   | -     | -          | <b>1H2</b>   | -     | -          |
| <b>3S1</b>   | -     | -          | <b>3H2</b>   | 0.00  | 8.19       | <b>5S1</b>   | -     | -          | <b>25B</b>   | -     | -          | <b>B3O</b>   | -     | -          | <b>1E</b>    | -     | -          |
| <b>4E</b>    | -     | -          |              |       |            | <b>B14</b>   | -     | -          | <b>1H2</b>   | -     | -          | <b>1H2</b>   | -     | -          | <b>5HO</b>   | -     | -          |
| <b>1H2</b>   | -     | -          | <b>25B</b>   | -     | -          | <b>4H3</b>   | -     | -          | <b>1E</b>    | -     | -          | <b>1E</b>    | -     | -          | <b>5H4</b>   | -     | -          |
| <b>1E</b>    | -     | -          | <b>1H2</b>   | -     | -          | <b>1H2</b>   | -     | -          | <b>3H4</b>   | -     | -          | <b>3H4</b>   | -     | -          | <b>E4</b>    | -     | -          |
| <b>EO</b>    | -     | -          | <b>1E</b>    | -     | -          | <b>1E</b>    | -     | -          | <b>EO</b>    | -     | -          | <b>3E</b>    | -     | -          | <b>3H4</b>   | -     | -          |
| <b>1HO</b>   | -     | -          | <b>3E</b>    | -     | -          | <b>1HO</b>   | -     | -          | <b>1HO</b>   | -     | -          | <b>1HO</b>   | -     | -          | <b>EO</b>    | -     | -          |
| <b>3H2</b>   | -     | -          | <b>1HO</b>   | -     | -          | <b>3H2</b>   | -     | -          | <b>3H2</b>   | -     | -          | <b>3H2</b>   | -     | -          | <b>1HO</b>   | -     | -          |
| <b>E2</b>    | -     | -          |

Table S23. Pyranose pucker populations (%) and relative free energies ( $\Delta G$ , kcal mol<sup>-1</sup>) from 20 and 10  $\mu$ s simulations of **5** and **6** (from reducing end)

| (6)    |       |            | (5)    |       |            | (5)    |       |            | (5)    |       |            |
|--------|-------|------------|--------|-------|------------|--------|-------|------------|--------|-------|------------|
| Pucker | Glc:1 | $\Delta G$ | Pucker | Glc:1 | $\Delta G$ | Pucker | Glc:2 | $\Delta G$ | Pucker | Glc:3 | $\Delta G$ |
|        | %     |            |        | %     |            |        | %     |            |        | %     |            |
| 4C1    | 92.54 | 0.05       | 4C1    | 85.83 | 0.09       | 4C1    | 96.96 | 0.02       | 4C1    | 97.87 | 0.01       |
| 1C4    | 7.21  | 1.56       | 1C4    | 12.21 | 1.25       | OS2    | 2.09  | 2.29       | 1C4    | 1.14  | 2.65       |
| 1S5    | 0.09  | 4.14       | 1S5    | 0.62  | 3.02       | 1C4    | 0.39  | 3.29       | OS2    | 0.74  | 2.91       |
| B25    | 0.05  | 4.56       | B25    | 0.57  | 3.06       | B25    | 0.18  | 3.73       | 3OB    | 0.08  | 4.26       |
| 14B    | 0.02  | 5.00       | OS2    | 0.37  | 3.33       | 3OB    | 0.17  | 3.77       | B25    | 0.05  | 4.47       |
| 2H1    | 0.02  | 5.18       | 5H4    | 0.14  | 3.90       | 1S3    | 0.05  | 4.46       | 1S3    | 0.03  | 4.90       |
| OS2    | 0.02  | 5.22       | 14B    | 0.07  | 4.28       | B3O    | 0.03  | 4.81       | B3O    | 0.02  | 5.14       |
| 2E     | 0.01  | 5.37       | 1S3    | 0.06  | 4.42       | 1S5    | 0.03  | 4.88       | 3S1    | 0.01  | 5.30       |
| 5H4    | 0.01  | 5.38       | 5E     | 0.06  | 4.45       | E5     | 0.02  | 5.07       | E5     | 0.01  | 5.49       |
| E1     | 0.01  | 5.48       | E4     | 0.03  | 4.76       | 2H1    | 0.02  | 5.18       | 2H1    | 0.01  | 5.56       |
| 1S3    | 0.01  | 5.52       | 2H1    | 0.02  | 5.18       | E1     | 0.01  | 5.30       | 1S5    | 0.01  | 5.70       |
| 5E     | 0.01  | 5.78       | E1     | 0.01  | 5.43       | OH5    | 0.01  | 5.41       | 2E     | 0.01  | 5.74       |
| E4     | 0.00  | 5.96       | 2E     | 0.00  | 5.89       | 4H5    | 0.01  | 5.66       | 2S0    | 0.01  | 5.78       |
| 5S1    | 0.00  | 6.31       | B3O    | 0.00  | 5.98       | 14B    | 0.01  | 5.78       | OH5    | 0.00  | 5.90       |
| 2H3    | 0.00  | 6.31       | 3OB    | 0.00  | 6.22       | 2E     | 0.01  | 5.83       | E1     | 0.00  | 6.04       |
| OH1    | 0.00  | 6.51       | 5HO    | 0.00  | 6.31       | 2S0    | 0.00  | 5.95       | 4H5    | 0.00  | 6.07       |
| 25B    | 0.00  | 6.72       | OH1    | 0.00  | 6.53       | 2H3    | 0.00  | 6.37       | 5S1    | 0.00  | 6.11       |
| 5HO    | 0.00  | 6.72       | 2H3    | 0.00  | 6.51       | 4E     | 0.00  | 6.43       | 14B    | 0.00  | 6.12       |
| B14    | 0.00  | 6.83       | 5S1    | 0.00  | 6.61       | OH1    | 0.00  | 6.48       | 2H3    | 0.00  | 6.31       |
| 2S0    | 0.00  | 6.89       | 3H4    | 0.00  | 6.72       | 5E     | 0.00  | 6.53       | 5H4    | 0.00  | 6.77       |
| E3     | 0.00  | 6.89       | 2S0    | 0.00  | 6.77       | OE     | 0.00  | 6.63       | OE     | 0.00  | 6.86       |
| B3O    | 0.00  | 6.96       | OH5    | 0.00  | 6.77       | 5H4    | 0.00  | 6.65       | B14    | 0.00  | 7.13       |
| E5     | 0.00  | 7.13       | E5     | 0.00  | 6.86       | E4     | 0.00  | 7.18       | 25B    | 0.00  | 7.18       |
| OE     | 0.00  | 7.13       | E3     | 0.00  | 6.92       | 4H3    | 0.00  | 7.24       | OH1    | 0.00  | 7.18       |
| OH5    | 0.00  | 7.24       | 4H5    | 0.00  | 7.65       | 3S1    | 0.00  | 7.45       | 5E     | 0.00  | 7.18       |
| 3OB    | 0.00  | 7.37       | OE     | 0.00  | 7.45       | 5HO    | 0.00  | 7.45       | E4     | 0.00  | 7.18       |
| 4H5    | 0.00  | 8.19       | 4E     | 0.00  | 7.78       | 3H4    | 0.00  | 7.45       | E3     | 0.00  | 7.37       |
| 4H3    | 0.00  | 8.19       | B14    | 0.00  | 8.19       | 5S1    | 0.00  | 7.65       | 4E     | 0.00  | 7.54       |
| 3H4    | 0.00  | 8.19       | 25B    | 0.00  | 8.19       | E3     | 0.00  | 7.54       | 3H4    | 0.00  | 7.95       |
|        |       |            |        |       |            | B14    | 0.00  | 8.60       |        |       |            |
|        |       |            |        |       |            | 25B    | 0.00  | 8.19       | 4H3    | -     | -          |
| 3S1    | -     | -          | 3S1    | -     | -          |        |       |            | 1H2    | -     | -          |
| 4E     | -     | -          | 4H3    | -     | -          | 1H2    | -     | -          | 1E     | -     | -          |
| 1H2    | -     | -          | 1H2    | -     | -          | 1E     | -     | -          | 5HO    | -     | -          |
| 1E     | -     | -          | 1E     | -     | -          | EO     | -     | -          | EO     | -     | -          |
| EO     | -     | -          | EO     | -     | -          | 3E     | -     | -          | 3E     | -     | -          |
| 3E     | -     | -          | 3E     | -     | -          | 1HO    | -     | -          | 1HO    | -     | -          |
| 1HO    | -     | -          | 1HO    | -     | -          | 3H2    | -     | -          | 3H2    | -     | -          |
| 3H2    | -     | -          | 3H2    | -     | -          | E2     | -     | -          | E2     | -     | -          |
| E2     | -     | -          | E2     | -     | -          |        |       |            |        |       |            |





S24: Time series of first hydration shell water occupancy and  $R_g$  in **1** (dodecasaccharide)

Water occupancy was computed using the Amber12 tool ptraj (keyword "watershell")

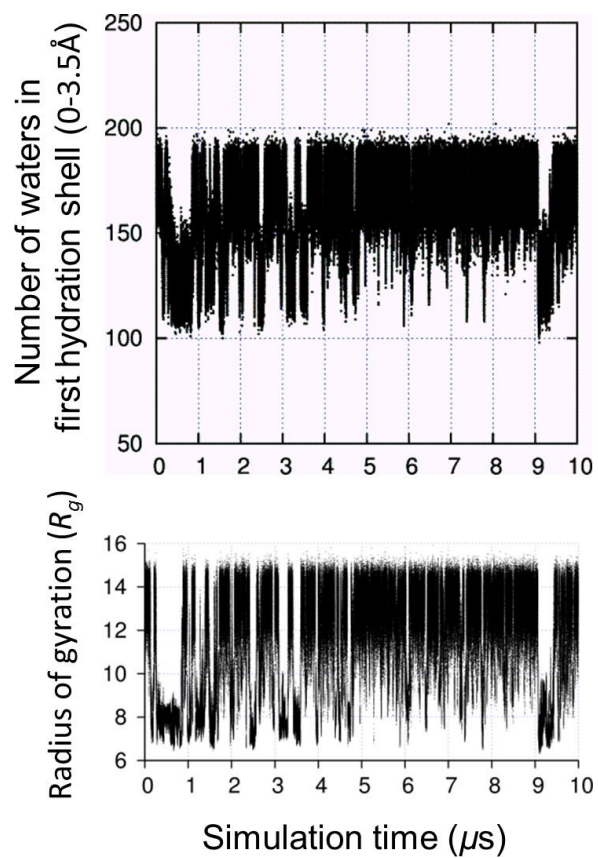

S25: Experimental  $^1\text{H}$ - $^1\text{H}$  three-bond vicinal spin-couplings ( $^3J_{\text{HH}}$ )

- Experimental errors are estimated to be  $\pm 0.2$  Hz

Experimental Data

|          | Tafazzoli et. al. <sup>1</sup> | Roshind et. al. <sup>2</sup> | Roshind et. al. <sup>2</sup> |
|----------|--------------------------------|------------------------------|------------------------------|
|          | <b>1</b>                       | <b>1</b>                     | <b>2</b>                     |
| $J_{12}$ | 3.8                            | 3.8                          | 3.9                          |
| $J_{23}$ | 9.8                            | 9.9                          | 9.9                          |
| $J_{34}$ | 9.1                            | 9.0                          | 9.2                          |
| $J_{45}$ | 10.0                           | 10.1                         | 10.1                         |

(1) Tafazzoli, M.; Grhiasi, M. *Carbohydr Res* **2007**, *342*, 2086.

(2) Roshind, M. U.; Tahtinen, P.; Niemitz, M.; Sjhohn, R. *Carbohydr Res* **2008**, *343*, 101

S26 Calculated  $^1\text{H}$ - $^1\text{H}$  three-bond vicinal spin-couplings ( $^3J_{\text{HH}}$ ): **1** (dodecasaccharide, 10  $\mu\text{s}$  simulation)

- $\mu\text{s}$  simulations were split into 1  $\mu\text{s}$  sub-sets to compute standard deviations (STDEV)
- $^3J_{\text{HH}}$  values were calculated using substituent-adjusted Karplus equations of Altona and Haasnoot
- Glc pyranose rings are numbered from the reducing end

| Glc                       | 1   | 2   | 3   | 4   | 5   | 6   | 7   | 8   | 9   | 10  | 11  | 12  |
|---------------------------|-----|-----|-----|-----|-----|-----|-----|-----|-----|-----|-----|-----|
| $J_{12}$                  | 3.0 | 3.4 | 3.4 | 3.4 | 3.5 | 3.4 | 3.4 | 3.4 | 3.4 | 3.4 | 3.4 | 3.3 |
| $J_{23}$                  | 7.5 | 7.6 | 7.5 | 7.3 | 7.1 | 7.4 | 7.4 | 7.4 | 7.5 | 7.6 | 7.6 | 7.7 |
| $J_{34}$                  | 7.2 | 7.4 | 7.3 | 7.0 | 6.8 | 7.1 | 7.1 | 7.2 | 7.3 | 7.4 | 7.4 | 7.4 |
| $J_{45}$                  | 7.8 | 8.2 | 8.1 | 7.9 | 7.7 | 7.9 | 8.0 | 8.0 | 8.1 | 8.1 | 8.2 | 8.1 |
| $J_{12} \pm \text{STDEV}$ | 0.1 | 0.0 | 0.0 | 0.0 | 0.1 | 0.1 | 0.1 | 0.0 | 0.0 | 0.0 | 0.0 | 0.1 |
| $J_{23} \pm \text{STDEV}$ | 0.3 | 0.1 | 0.2 | 0.4 | 0.6 | 0.4 | 0.3 | 0.2 | 0.1 | 0.1 | 0.1 | 0.2 |
| $J_{34} \pm \text{STDEV}$ | 0.3 | 0.1 | 0.3 | 0.5 | 0.8 | 0.5 | 0.3 | 0.3 | 0.1 | 0.2 | 0.2 | 0.2 |
| $J_{45} \pm \text{STDEV}$ | 0.3 | 0.1 | 0.1 | 0.3 | 0.5 | 0.3 | 0.2 | 0.2 | 0.1 | 0.1 | 0.1 | 0.2 |

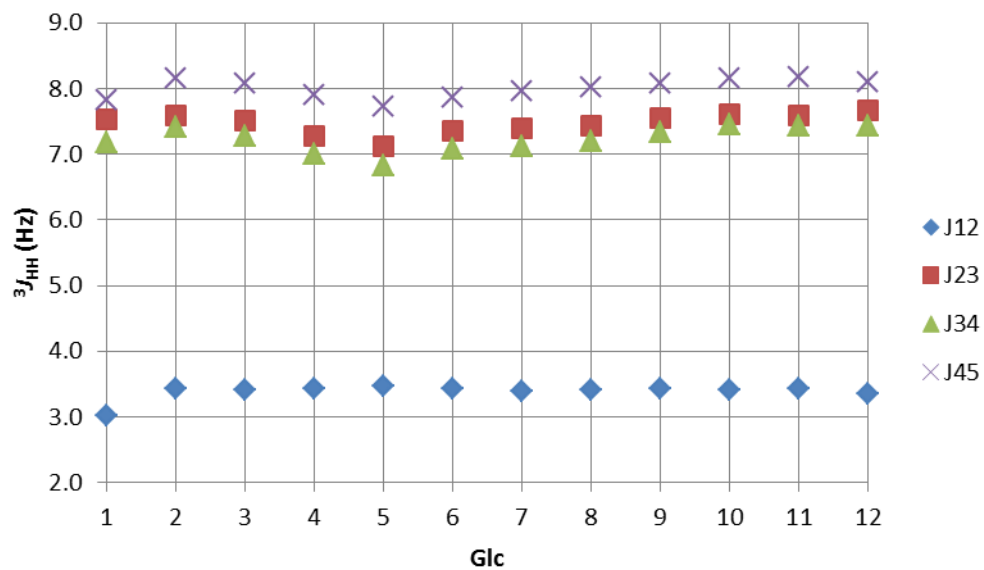

S27: Calculated  $^3J_{\text{HH}}$  values: antiparallel double-helix **2** (10  $\mu\text{s}$  simulation), strand A

- $\mu\text{s}$  simulations were split into 1  $\mu\text{s}$  sub-sets to compute standard deviations (STDEV)
- $^3J_{\text{HH}}$  values were calculated using substituent-adjusted Karplus equations of Altona and Haasnoot
- Glc pyranose rings are numbered from the reducing end

| Glc                       | 1   | 2   | 3   | 4   | 5   | 6   | 7   | 8   | 9   | 10  | 11  | 12  |
|---------------------------|-----|-----|-----|-----|-----|-----|-----|-----|-----|-----|-----|-----|
| $J_{12}$                  | 3.0 | 3.4 | 3.3 | 3.3 | 3.3 | 3.3 | 3.4 | 3.5 | 3.5 | 3.6 | 3.6 | 3.4 |
| $J_{23}$                  | 7.6 | 7.7 | 7.8 | 8.0 | 8.1 | 8.1 | 8.2 | 8.1 | 8.0 | 7.9 | 7.8 | 7.6 |
| $J_{34}$                  | 7.3 | 7.6 | 7.6 | 7.9 | 8.0 | 8.1 | 8.2 | 8.2 | 8.1 | 8.1 | 7.8 | 7.4 |
| $J_{45}$                  | 7.9 | 8.2 | 8.2 | 8.3 | 8.3 | 8.3 | 8.4 | 8.4 | 8.3 | 8.3 | 8.3 | 8.1 |
| $J_{12} \pm \text{STDEV}$ | 0.1 | 0.0 | 0.0 | 0.0 | 0.0 | 0.1 | 0.0 | 0.0 | 0.0 | 0.0 | 0.0 | 0.1 |
| $J_{23} \pm \text{STDEV}$ | 0.2 | 0.2 | 0.2 | 0.1 | 0.1 | 0.1 | 0.0 | 0.1 | 0.2 | 0.1 | 0.1 | 0.2 |
| $J_{34} \pm \text{STDEV}$ | 0.2 | 0.2 | 0.2 | 0.2 | 0.1 | 0.2 | 0.1 | 0.1 | 0.3 | 0.1 | 0.2 | 0.2 |
| $J_{45} \pm \text{STDEV}$ | 0.2 | 0.1 | 0.1 | 0.0 | 0.0 | 0.1 | 0.0 | 0.0 | 0.1 | 0.1 | 0.1 | 0.2 |

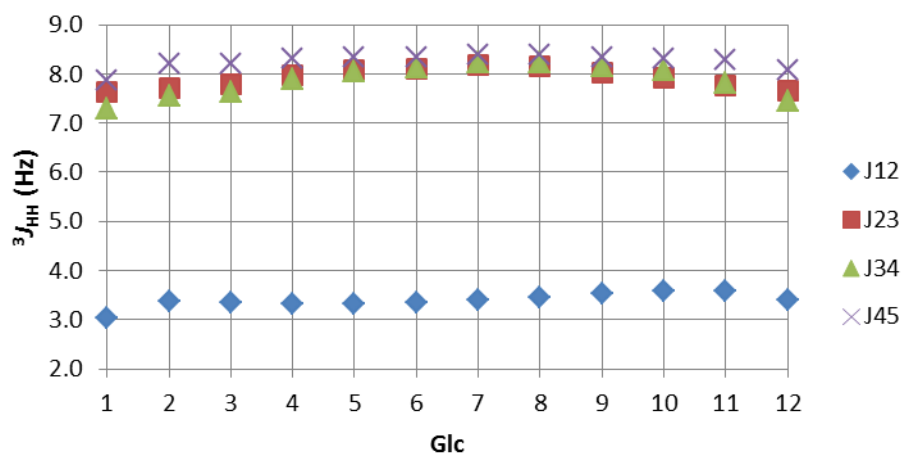

S27: Calculated  $^3J_{\text{HH}}$  values: antiparallel double-helix 2 (10  $\mu\text{s}$  simulation), strand B

- $\mu\text{s}$  simulations were split into 1  $\mu\text{s}$  sub-sets to compute standard deviations (STDEV)
- $^3J_{\text{HH}}$  values were calculated using substituent-adjusted Karplus equations of Altona and Haasnoot
- Glc pyranose rings are numbered from the reducing end

| Glc                       | 1   | 2   | 3   | 4   | 5   | 6   | 7   | 8   | 9   | 10  | 11  | 12  |
|---------------------------|-----|-----|-----|-----|-----|-----|-----|-----|-----|-----|-----|-----|
| $J_{12}$                  | 3.0 | 3.4 | 3.3 | 3.3 | 3.3 | 3.4 | 3.4 | 3.5 | 3.5 | 3.6 | 3.6 | 3.4 |
| $J_{23}$                  | 7.5 | 7.7 | 7.9 | 8.0 | 8.1 | 8.1 | 8.2 | 8.2 | 8.0 | 7.9 | 7.9 | 7.5 |
| $J_{34}$                  | 7.2 | 7.6 | 7.7 | 7.8 | 8.0 | 8.2 | 8.2 | 8.2 | 8.1 | 8.1 | 8.0 | 7.3 |
| $J_{45}$                  | 7.8 | 8.2 | 8.3 | 8.3 | 8.3 | 8.4 | 8.4 | 8.4 | 8.3 | 8.3 | 8.3 | 7.9 |
| $J_{12} \pm \text{STDEV}$ | 0.1 | 0.0 | 0.0 | 0.0 | 0.0 | 0.1 | 0.0 | 0.0 | 0.0 | 0.1 | 0.0 | 0.1 |
| $J_{23} \pm \text{STDEV}$ | 0.3 | 0.2 | 0.1 | 0.2 | 0.1 | 0.1 | 0.0 | 0.0 | 0.2 | 0.1 | 0.0 | 0.4 |
| $J_{34} \pm \text{STDEV}$ | 0.4 | 0.3 | 0.2 | 0.3 | 0.2 | 0.1 | 0.0 | 0.1 | 0.3 | 0.2 | 0.1 | 0.4 |
| $J_{45} \pm \text{STDEV}$ | 0.4 | 0.2 | 0.0 | 0.1 | 0.0 | 0.0 | 0.0 | 0.0 | 0.1 | 0.1 | 0.0 | 0.5 |

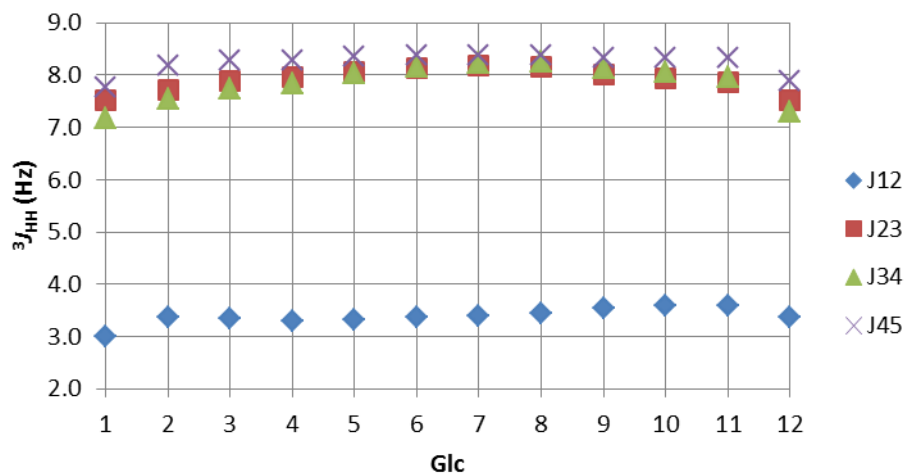

S27 continued

S28: Calculated  $^3J_{\text{HH}}$  values: parallel double-helix **3** (10  $\mu\text{s}$  simulation), strand A

- $\mu\text{s}$  simulations were split into 1  $\mu\text{s}$  sub-sets to compute standard deviations (STDEV)
- $^3J_{\text{HH}}$  values were calculated using substituent-adjusted Karplus equations of Altona and Haasnoot
- Glc pyranose rings are numbered from the reducing end

| Glc                       | 1   | 2   | 3   | 4   | 5   | 6   | 7   | 8   | 9   | 10  | 11  | 12  |
|---------------------------|-----|-----|-----|-----|-----|-----|-----|-----|-----|-----|-----|-----|
| $J_{12}$                  | 3.0 | 3.5 | 3.6 | 3.6 | 3.7 | 3.7 | 3.7 | 3.6 | 3.7 | 3.7 | 3.7 | 3.4 |
| $J_{23}$                  | 7.5 | 7.7 | 7.6 | 7.7 | 7.7 | 7.7 | 7.6 | 7.6 | 7.7 | 7.7 | 7.7 | 7.7 |
| $J_{34}$                  | 7.1 | 7.8 | 7.7 | 7.9 | 7.9 | 7.9 | 7.8 | 7.8 | 7.9 | 7.9 | 8.0 | 7.5 |
| $J_{45}$                  | 7.6 | 8.3 | 8.3 | 8.3 | 8.3 | 8.3 | 8.3 | 8.2 | 8.3 | 8.3 | 8.4 | 8.1 |
| $J_{12} \pm \text{STDEV}$ | 0.1 | 0.0 | 0.0 | 0.1 | 0.0 | 0.1 | 0.1 | 0.1 | 0.1 | 0.1 | 0.1 | 0.0 |
| $J_{23} \pm \text{STDEV}$ | 0.5 | 0.1 | 0.3 | 0.1 | 0.1 | 0.2 | 0.2 | 0.3 | 0.1 | 0.1 | 0.0 | 0.1 |
| $J_{34} \pm \text{STDEV}$ | 0.5 | 0.2 | 0.4 | 0.1 | 0.1 | 0.4 | 0.3 | 0.4 | 0.1 | 0.1 | 0.1 | 0.1 |
| $J_{45} \pm \text{STDEV}$ | 0.6 | 0.1 | 0.1 | 0.0 | 0.1 | 0.1 | 0.1 | 0.4 | 0.1 | 0.1 | 0.0 | 0.1 |

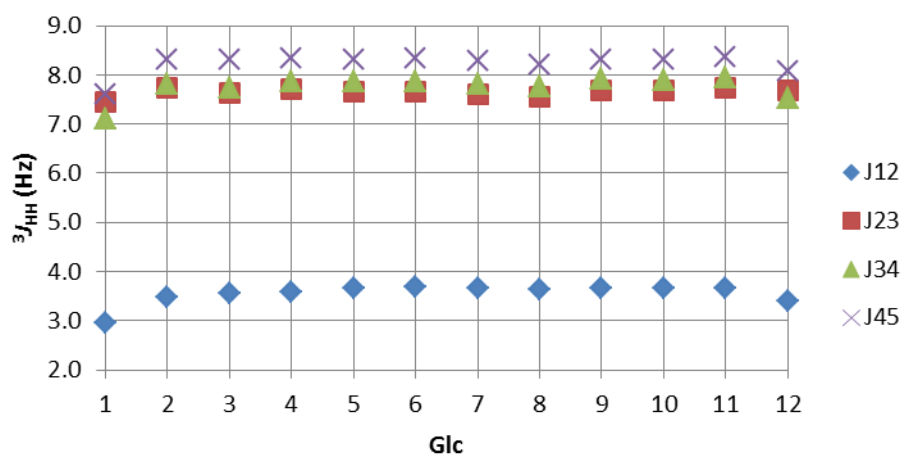

S28: Calculated  $^3J_{\text{HH}}$  values: parallel double-helix **3** (10  $\mu\text{s}$  simulation), strand B

- $\mu\text{s}$  simulations were split into 1  $\mu\text{s}$  sub-sets to compute standard deviations (STDEV)
- $^3J_{\text{HH}}$  values were calculated using substituent-adjusted Karplus equations of Altona and Haasnoot
- Glc pyranose rings are numbered from the reducing end

| Glc                       | 1   | 2   | 3   | 4   | 5   | 6   | 7   | 8   | 9   | 10  | 11  | 12  |
|---------------------------|-----|-----|-----|-----|-----|-----|-----|-----|-----|-----|-----|-----|
| $J_{12}$                  | 3.0 | 3.5 | 3.6 | 3.6 | 3.7 | 3.7 | 3.7 | 3.7 | 3.7 | 3.6 | 3.6 | 3.3 |
| $J_{23}$                  | 7.7 | 7.7 | 7.8 | 7.7 | 7.7 | 7.7 | 7.6 | 7.7 | 7.6 | 7.7 | 7.7 | 7.6 |
| $J_{34}$                  | 7.4 | 7.8 | 7.9 | 7.9 | 8.0 | 7.9 | 7.8 | 8.0 | 7.8 | 7.9 | 7.9 | 7.4 |
| $J_{45}$                  | 7.9 | 8.3 | 8.4 | 8.3 | 8.4 | 8.3 | 8.3 | 8.4 | 8.3 | 8.3 | 8.3 | 7.9 |
| $J_{12} \pm \text{STDEV}$ | 0.1 | 0.0 | 0.0 | 0.0 | 0.1 | 0.1 | 0.1 | 0.1 | 0.1 | 0.1 | 0.1 | 0.1 |
| $J_{23} \pm \text{STDEV}$ | 0.3 | 0.1 | 0.1 | 0.1 | 0.0 | 0.2 | 0.2 | 0.1 | 0.3 | 0.1 | 0.1 | 0.2 |
| $J_{34} \pm \text{STDEV}$ | 0.3 | 0.2 | 0.1 | 0.2 | 0.1 | 0.2 | 0.3 | 0.1 | 0.4 | 0.1 | 0.1 | 0.2 |
| $J_{45} \pm \text{STDEV}$ | 0.4 | 0.0 | 0.0 | 0.1 | 0.0 | 0.2 | 0.2 | 0.1 | 0.2 | 0.1 | 0.1 | 0.4 |

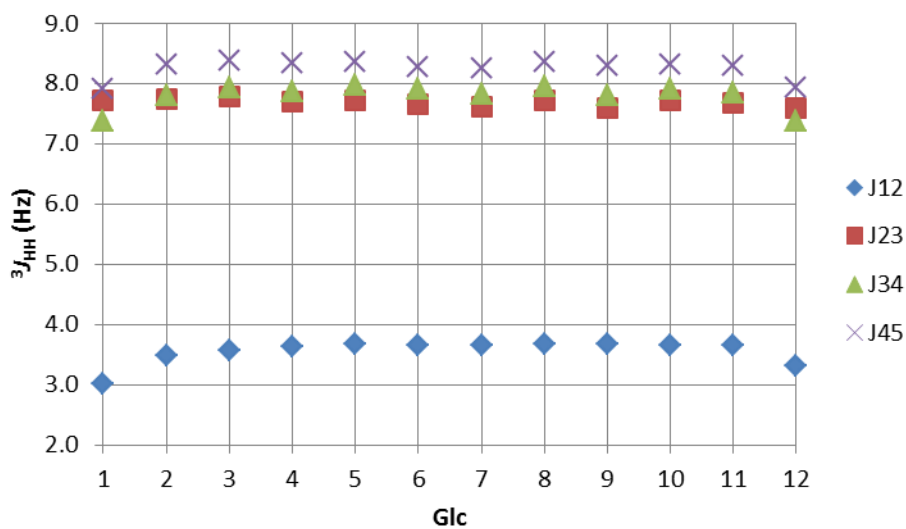

S28 continued

S29: Calculated  $^3J_{\text{HH}}$  values: 4 (hexasaccharide, 10  $\mu\text{s}$  simulation)

- $\mu\text{s}$  simulations were split into 1  $\mu\text{s}$  sub-sets to compute standard deviations (STDEV)
- $^3J_{\text{HH}}$  values were calculated using substituent-adjusted Karplus equations of Altona and Haasnoot
- Glc pyranose rings are numbered from the reducing end

|                           | CAL | CAL | CAL | CAL | CAL | CAL |
|---------------------------|-----|-----|-----|-----|-----|-----|
| Glc                       | 1   | 2   | 3   | 4   | 5   | 6   |
| $J_{12}$                  | 3.0 | 3.4 | 3.4 | 3.3 | 3.4 | 3.3 |
| $J_{23}$                  | 7.7 | 7.7 | 7.5 | 7.8 | 7.8 | 7.8 |
| $J_{34}$                  | 7.5 | 7.7 | 7.4 | 7.7 | 7.8 | 7.6 |
| $J_{45}$                  | 7.9 | 8.2 | 8.1 | 8.2 | 8.3 | 8.3 |
| $J_{12} \pm \text{STDEV}$ | 0.2 | 0.1 | 0.1 | 0.0 | 0.0 | 0.0 |
| $J_{23} \pm \text{STDEV}$ | 0.7 | 0.2 | 0.3 | 0.2 | 0.2 | 0.0 |
| $J_{34} \pm \text{STDEV}$ | 0.7 | 0.3 | 0.4 | 0.3 | 0.3 | 0.0 |
| $J_{45} \pm \text{STDEV}$ | 0.9 | 0.3 | 0.2 | 0.2 | 0.1 | 0.0 |

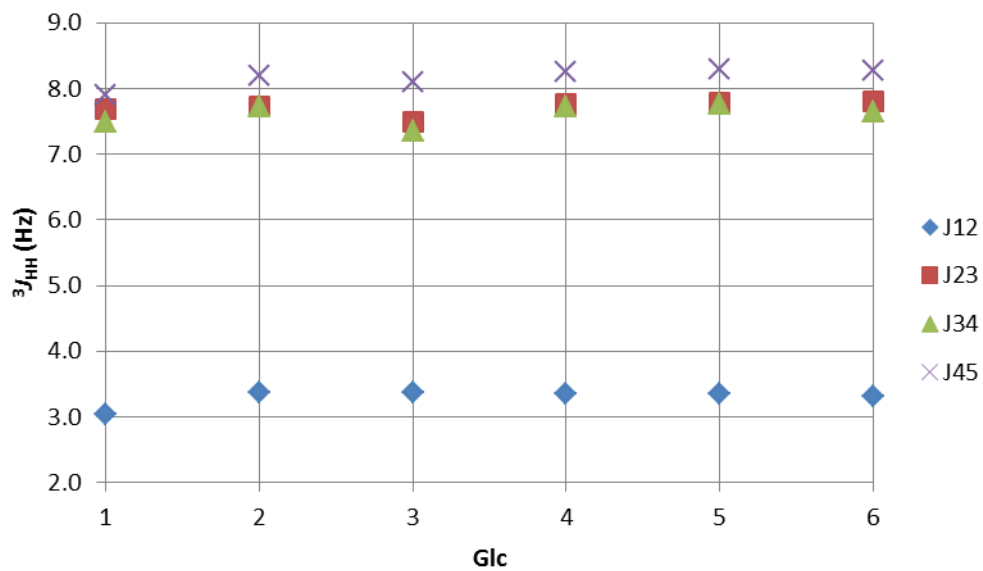



S30: Calculated  $^3J_{\text{HH}}$  values: **5** (trisaccharide) and **6** (monosaccharide) (10 and 20  $\mu\text{s}$  simulations)

- $\mu\text{s}$  simulations were split into 1  $\mu\text{s}$  sub-sets to compute standard deviations (STDEV)
- $^3J_{\text{HH}}$  values were calculated using substituent-adjusted Karplus equations of Altona and Haasnoot
- Glc pyranose rings are numbered from the reducing end

|                           | <b>(6)</b> | <b>(5)</b> | <b>(5)</b> | <b>(5)</b> |
|---------------------------|------------|------------|------------|------------|
|                           | <b>1</b>   | <b>1</b>   | <b>2</b>   | <b>3</b>   |
| $J_{12}$                  | 3.0        | 2.9        | 3.4        | 3.3        |
| $J_{23}$                  | 7.6        | 7.3        | 7.7        | 7.7        |
| $J_{34}$                  | 7.1        | 7.1        | 7.7        | 7.6        |
| $J_{45}$                  | 7.7        | 7.4        | 8.3        | 8.2        |
| $J_{12} \pm \text{STDEV}$ | 0.3        | 0.3        | 0.0        | 0.0        |
| $J_{23} \pm \text{STDEV}$ | 0.8        | 1.0        | 0.2        | 0.1        |
| $J_{34} \pm \text{STDEV}$ | 0.7        | 1.1        | 0.3        | 0.2        |
| $J_{45} \pm \text{STDEV}$ | 1.1        | 1.3        | 0.1        | 0.2        |

Table S31: Analysis of  $\alpha$ -D-Glc puckers in 174 high-resolution Protein Data Bank entries ( $< 2\text{\AA}$ )

Computed Cremer-Pople parameters are tabulated for entries with non- $^4\text{C}_1$  Glc puckers ( $\theta > 60^\circ$ ).

| PDB_ID | Ring | $\theta(^\circ)$ | $\phi(^\circ)$ | Q    | Unique |
|--------|------|------------------|----------------|------|--------|
| 4BFN   | 1    | 67               | 215            | 0.60 |        |
| 4BFN   | 4    | 90               | 222            | 0.76 | 1      |
| 2BQP   | 1    | 180              | 152            | 0.61 | 1      |
| 3U2W   | 1    | 77               | 226            | 0.66 | 1      |
| 3TSA   | 1    | 84               | 192            | 0.52 | 1      |
| 3GD9   | 1    | 63               | 238            | 0.51 | 1      |
| 3L2M   | 13   | 88               | 134            | 0.73 | 1      |
| 3UYL   | 1    | 66               | 230            | 0.59 | 1      |
| 2BHY   | 2    | 60               | 227            | 0.56 | 1      |
| 2VXJ   | 2    | 74               | 205            | 0.65 | 1      |
| 1GEG   | 2    | 90               | 191            | 0.73 |        |
| 1GEG   | 3    | 89               | 207            | 0.74 |        |
| 1GEG   | 4    | 90               | 212            | 0.74 |        |
| 1GEG   | 5    | 89               | 196            | 0.74 |        |
| 1GEG   | 6    | 87               | 179            | 0.75 |        |
| 1GEG   | 7    | 89               | 209            | 0.75 |        |
| 1GEG   | 8    | 90               | 186            | 0.73 | 1      |
| 1JDC   | 4    | 62               | 197            | 0.51 | 1      |
| 1Q6C   | 2    | 85               | 232            | 0.74 | 1      |
| 1UH4   | 7    | 76               | 179            | 0.59 | 1      |
| 1PPF   | 1    | 93               | 330            | 0.72 | 1      |
| 4AFC   | 2    | 99               | 194            | 0.74 | 1      |
| 1QSG   | 1    | 76               | 257            | 0.72 | 1      |
| 3U2V   | 1    | 90               | 211            | 0.80 |        |
| 3U2V   | 3    | 84               | 213            | 0.75 | 1      |
| 3U2V   | 8    | 92               | 234            | 0.76 |        |
| 3U2V   | 9    | 99               | 233            | 0.76 | 1      |
| 1QJW   | 1    | 92               | 157            | 0.67 |        |
| 1QJW   | 3    | 91               | 155            | 0.68 | 1      |
| Total  |      |                  |                |      | 19     |

**PDB entries analysed ( $< 1.5\text{\AA}$  resolution):** 1C58, 1EU1, 1GWM, 1H5V, 1HX0, 1K3I, 1OJJ, 1PWB, 1S5M, 1UOZ, 1W8T, 1WDR, 2J72, 2J73, 2JEN, 2X6W, 2X6X, 2X6Y, 3AXI, 3BC9, 3CHB, 3O8M, 3OEA, 3OG2, 3OGV, 3U2U, 4BFN, 4BFO, 4FCH

**29 in total**

**PDB entries analysed ( $1.5\text{-}2.0\text{\AA}$  resolution):** 1ANF, 1BYB, 1CEL, 1CXL, 1CZA, 1D3C, 1DO1, 1DO3, 1DO4, 1DO7, 1E3Z, 1E5J, 1ELJ, 1EZ9, 1FQA, 1FQB, 1G94, 1GEG, 1GWW, 1H5U, 1JDC, 1JDD, 1JG9, 1K72, 1KCL, 1L5W, 1LAX, 1LES, 1NE7, 1NSZ, 1OFC, 1OGO, 1OH3, 1OJK, 1P2D, 1PPF, 1Q2E, 1Q6C, 1Q6E, 1QFO, 1QJW, 1QSG, 1RPI, 1TYW, 1UA4, 1UH4, 1UKS, 1V2B, 1V3H, 1V3I, 1VEM, 1WDS, 1WLW, 1WPC, 1XIF, 1Y4C, 1Z32, 2A2Q, 2AER, 2ASV, 2ATI, 2B3B, 2BHY, 2BQP, 2BWA, 2BXY, 2BXZ, 2BY0, 2BY1, 2BY2, 2BY3, 2C3W, 2C4F, 2CN3, 2D3N, 2ESR, 2F2E, 2FH6, 2FH8, 2FHB, 2FHC, 2FHF, 2GJP, 2GVY, 2HIS, 2HYR, 2JJB, 2PYD, 2V8L, 2VJJ, 2VXJ, 2X85, 2XG9, 2Z8G, 2ZOX, 2ZYO, 3A4A, 3AXH, 3AZT, 3BLP, 3BMW, 3BZ4, 3C6S, 3CZG, 3DHP, 3F9M, 3FW3, 3GD9, 3HG3, 3L2M, 3LSM, 3MBP, 3MKK, 3O0W, 3OGR, 3OGS, 3OLE, 3OLI, 3S9C, 3SIT, 3T7O, 3TSA, 3U2V, 3U2W, 3UYL, 3V0W, 3VEV, 3VF6, 3VMO, 3W7S, 3WBA, 3WBE, 4AD4, 4AD5, 4AF9, 4AFC, 4AL9, 4B4R, 4DCH, 4DGR, 4DO6, 4H7V, 4ISE, 4KWU, 4MBP

**145 in total**

S32: Radii of gyration: averages, means and standard deviations

Averages (AVE), means and standard deviations of  $R_g$  from each 1  $\mu\text{s}$  time window during each 10  $\mu\text{s}$  simulation of **1**, **2**, and **3**

| <b>(1) Single-stranded amylose</b> |             |       | <b>(2) Antiparallel double-helix</b> |             |            | <b>(3) Parallel double-helix</b> |             |            |
|------------------------------------|-------------|-------|--------------------------------------|-------------|------------|----------------------------------|-------------|------------|
| $\mu\text{s}$                      | AVE         | STDEV | $\mu\text{s}$                        | AVE         | STDEV      | $\mu\text{s}$                    | AVE         | STDEV      |
| 1                                  | 9.4         | 2.5   | 1                                    | <u>12.7</u> | <u>1.0</u> | 1                                | <u>11.7</u> | <u>2.2</u> |
| 2                                  | 10.4        | 2.5   | 2                                    | 13.6        | 0.8        | 2                                | 14.2        | 0.7        |
| 3                                  | 11.4        | 2.5   | 3                                    | 13.8        | 0.7        | 3                                | 14.4        | 0.3        |
| 4                                  | 10.7        | 2.7   | 4                                    | 13.5        | 1.0        | 4                                | 14.4        | 0.2        |
| 5                                  | 11.9        | 2.2   | 5                                    | 13.4        | 0.8        | 5                                | 14.5        | 0.3        |
| 6                                  | 12.8        | 1.4   | 6                                    | 12.8        | 1.0        | 6                                | 14.3        | 0.5        |
| 7                                  | 12.2        | 1.9   | 7                                    | 13.2        | 0.8        | 7                                | 14.4        | 0.5        |
| 8                                  | 12.3        | 2.0   | 8                                    | 12.8        | 0.8        | 8                                | 14.6        | 0.3        |
| 9                                  | 12.8        | 1.4   | 9                                    | 12.9        | 0.8        | 9                                | 14.5        | 0.4        |
| 10                                 | 10.7        | 2.6   | 10                                   | 13.0        | 1.0        | 10                               | 14.5        | 0.3        |
| <b>MEAN(1-10)</b>                  | <b>11.5</b> |       | <b>MEAN(2-10)</b>                    | <b>13.2</b> |            | <b>MEAN(2-10)</b>                | <b>14.4</b> |            |
| <b>STDEV(1-10)</b>                 | <b>1.1</b>  |       | <b>STDEV(2-10)</b>                   | <b>0.3</b>  |            | <b>STDEV(2-10)</b>               | <b>0.1</b>  |            |

Underlined values indicate the initial 1  $\mu\text{s}$  excluded for calculation of molecular properties for **2** and **3**

S33: Occupancy of the *anti*  $\psi$  geometry in each linkage from 10 and 20  $\mu$ s simulations of **1-5**

| Link      | strandA |     | strandB |     | Hexa- | Tri- |
|-----------|---------|-----|---------|-----|-------|------|
|           | 1       | 2   | 2       | 3   | 4     | 5    |
| <b>1</b>  | 0.9     | 0.7 | 1.1     | 1.2 | 0.0   | 0.1  |
| <b>2</b>  | 1.6     | 0.3 | 1.1     | 0.0 | 0.1   | 1.9  |
| <b>3</b>  | 0.9     | 0.2 | 0.0     | 3.5 | 1.7   |      |
| <b>4</b>  | 2.7     | 0.0 | 0.0     | 0.0 | 0.0   |      |
| <b>5</b>  | 2.9     | 0.0 | 0.0     | 0.0 | 8.8   |      |
| <b>6</b>  | 4.1     | 0.0 | 0.0     | 0.0 | 0.0   |      |
| <b>7</b>  | 2.0     | 0.0 | 0.0     | 0.0 | 0.1   |      |
| <b>8</b>  | 1.5     | 0.0 | 0.0     | 0.0 | 0.0   |      |
| <b>9</b>  | 1.5     | 0.0 | 0.0     | 0.0 | 0.3   |      |
| <b>10</b> | 1.0     | 0.2 | 0.0     | 0.0 | 0.0   |      |
| <b>11</b> | 1.5     | 0.2 | 0.5     | 0.3 | 0.0   |      |

Table reports percentage residence of negative glycosidic  $\psi$  torsion values (derived from time series).

Linkages are numbered from the reducing end.

S34: Classification of the 38 canonical pyranose ring puckers

|            |     |   |                |   |     |   |     |   |              |   |     |
|------------|-----|---|----------------|---|-----|---|-----|---|--------------|---|-----|
| <b>4C1</b> | -1  | < | $\theta^\circ$ | < | 36  | & | -16 | < | $\phi^\circ$ | < | 345 |
| <b>OE</b>  | 36  | < | $\theta^\circ$ | < | 72  | & | -16 | < | $\phi^\circ$ | < | 15  |
| <b>OH1</b> | 36  | < | $\theta^\circ$ | < | 72  | & | 15  | < | $\phi^\circ$ | < | 45  |
| <b>E1</b>  | 36  | < | $\theta^\circ$ | < | 72  | & | 45  | < | $\phi^\circ$ | < | 75  |
| <b>2H1</b> | 36  | < | $\theta^\circ$ | < | 72  | & | 75  | < | $\phi^\circ$ | < | 105 |
| <b>2E</b>  | 36  | < | $\theta^\circ$ | < | 72  | & | 105 | < | $\phi^\circ$ | < | 135 |
| <b>2H3</b> | 36  | < | $\theta^\circ$ | < | 72  | & | 135 | < | $\phi^\circ$ | < | 165 |
| <b>E3</b>  | 36  | < | $\theta^\circ$ | < | 72  | & | 165 | < | $\phi^\circ$ | < | 195 |
| <b>4H3</b> | 36  | < | $\theta^\circ$ | < | 72  | & | 195 | < | $\phi^\circ$ | < | 225 |
| <b>4E</b>  | 36  | < | $\theta^\circ$ | < | 72  | & | 225 | < | $\phi^\circ$ | < | 255 |
| <b>4H5</b> | 36  | < | $\theta^\circ$ | < | 72  | & | 255 | < | $\phi^\circ$ | < | 285 |
| <b>E5</b>  | 36  | < | $\theta^\circ$ | < | 72  | & | 285 | < | $\phi^\circ$ | < | 315 |
| <b>OH5</b> | 36  | < | $\theta^\circ$ | < | 72  | & | 315 | < | $\phi^\circ$ | < | 345 |
| <b>3OB</b> | 72  | < | $\theta^\circ$ | < | 108 | & | -16 | < | $\phi^\circ$ | < | 15  |
| <b>3S1</b> | 72  | < | $\theta^\circ$ | < | 108 | & | 15  | < | $\phi^\circ$ | < | 45  |
| <b>B14</b> | 72  | < | $\theta^\circ$ | < | 108 | & | 45  | < | $\phi^\circ$ | < | 75  |
| <b>5S1</b> | 72  | < | $\theta^\circ$ | < | 108 | & | 75  | < | $\phi^\circ$ | < | 105 |
| <b>25B</b> | 72  | < | $\theta^\circ$ | < | 108 | & | 105 | < | $\phi^\circ$ | < | 135 |
| <b>25O</b> | 72  | < | $\theta^\circ$ | < | 108 | & | 135 | < | $\phi^\circ$ | < | 165 |
| <b>B3O</b> | 72  | < | $\theta^\circ$ | < | 108 | & | 165 | < | $\phi^\circ$ | < | 195 |
| <b>1S3</b> | 72  | < | $\theta^\circ$ | < | 108 | & | 195 | < | $\phi^\circ$ | < | 225 |
| <b>14B</b> | 72  | < | $\theta^\circ$ | < | 108 | & | 225 | < | $\phi^\circ$ | < | 255 |
| <b>1S5</b> | 72  | < | $\theta^\circ$ | < | 108 | & | 255 | < | $\phi^\circ$ | < | 285 |
| <b>B25</b> | 72  | < | $\theta^\circ$ | < | 108 | & | 285 | < | $\phi^\circ$ | < | 315 |
| <b>OS2</b> | 72  | < | $\theta^\circ$ | < | 108 | & | 315 | < | $\phi^\circ$ | < | 345 |
| <b>EO</b>  | 108 | < | $\theta^\circ$ | < | 144 | & | -16 | < | $\phi^\circ$ | < | 15  |
| <b>1HO</b> | 108 | < | $\theta^\circ$ | < | 144 | & | 15  | < | $\phi^\circ$ | < | 45  |
| <b>1E</b>  | 108 | < | $\theta^\circ$ | < | 144 | & | 45  | < | $\phi^\circ$ | < | 75  |
| <b>1H2</b> | 108 | < | $\theta^\circ$ | < | 144 | & | 75  | < | $\phi^\circ$ | < | 105 |
| <b>E2</b>  | 108 | < | $\theta^\circ$ | < | 144 | & | 105 | < | $\phi^\circ$ | < | 135 |
| <b>3H2</b> | 108 | < | $\theta^\circ$ | < | 144 | & | 135 | < | $\phi^\circ$ | < | 165 |
| <b>3E</b>  | 108 | < | $\theta^\circ$ | < | 144 | & | 165 | < | $\phi^\circ$ | < | 195 |
| <b>3H4</b> | 108 | < | $\theta^\circ$ | < | 144 | & | 195 | < | $\phi^\circ$ | < | 225 |
| <b>E4</b>  | 108 | < | $\theta^\circ$ | < | 144 | & | 225 | < | $\phi^\circ$ | < | 255 |
| <b>5H4</b> | 108 | < | $\theta^\circ$ | < | 144 | & | 255 | < | $\phi^\circ$ | < | 285 |
| <b>5E</b>  | 108 | < | $\theta^\circ$ | < | 144 | & | 285 | < | $\phi^\circ$ | < | 315 |
| <b>5HO</b> | 108 | < | $\theta^\circ$ | < | 144 | & | 315 | < | $\phi^\circ$ | < | 345 |
| <b>1C4</b> | 144 | < | $\theta^\circ$ | < | 180 | & | -16 | < | $\phi^\circ$ | < | 345 |

$\theta$  and  $\phi$  are the Cremer-Pople azimuthal and meridian angles, respectively.
